# Supplementary material for: Influence of Intraoral Scanners, Operators, and Data Processing on Dimensional Accuracy of Dental Casts for Unsupervised Clinical Machine Learning: An In Vitro Comparative Study
Source: Hindawi journal article supplement (doi:10.1155/2023/7542813), 2023-11-22
Supplement: f1 [file 7542813.f1.pdf]

# Influence of intraoral scanners, operators, and data processing on dimensional accuracy of dental casts for unsupervised clinical machine learning: An invitro comparative study

## Supplementary File

### Contents

|                                                                                                          |    |
|----------------------------------------------------------------------------------------------------------|----|
| The fundamentals of vision transformer computing .....                                                   | 2  |
| Table S1. Hausdorff's Distance Data table of native scans (Lab scanner considered standard) .....        | 3  |
| Table S2. Hausdorff's Distance Data table of augmented scans (Lab scanner considered standard) .....     | 4  |
| Table S3. Hausdorff's Distance Data table comparing native dataset vs augmented dataset .....            | 5  |
| Table S4. Root mean square error (RMSE) value of native scans (Lab scanner considered standard) ...      | 6  |
| Table S5. Root mean square error (RMSE) value of augmented scans (Lab scanner considered standard) ..... | 7  |
| Heatmaps of Native scans generated through Hausdorff's distance evaluation .....                         | 8  |
| IOS1 + OP1 .....                                                                                         | 8  |
| IOS1 + OP2 .....                                                                                         | 16 |
| IOS2 + OP1 .....                                                                                         | 24 |
| IOS2 + OP2 .....                                                                                         | 32 |
| Heatmaps of Augmented scans generated through Hausdorff's distance evaluation.....                       | 40 |
| IOS1 + OP1 .....                                                                                         | 40 |
| IOS1 + OP2 .....                                                                                         | 48 |
| IOS2 + OP1 .....                                                                                         | 56 |
| IOS2 + OP2 .....                                                                                         | 64 |
| Table S6. Validation Accuracy outcomes from 3DVIT.....                                                   | 72 |
| Additional References .....                                                                              | 73 |

## The fundamentals of vision transformer computing

Vision Transformers<sup>i</sup> break an image into patches, which are flattened and linearly projected to obtain their representations. These representations are then processed by a transformer encoder, a powerful neural network architecture for sequence modeling. The transformer encoder<sup>ii</sup> captures spatial relationships and dependencies between patches, enabling the model to understand the image's content. Finally, a multilayer perceptron<sup>iii</sup> (MLP) head is used to make predictions based on the encoded information.

The linear projection of flattened patches is obtained by multiplying the patch matrix with a learnable weight matrix. This projection transforms the pixel-level information into a higher-dimensional representation, enhancing the model's ability to capture complex patterns.

The transformer encoder consists of multiple layers, each composed of self-attention mechanisms<sup>iv</sup> and feed-forward neural networks. Self-attention allows the model to weigh the importance of different patches based on their relationships, while the feed-forward networks introduce non-linear transformations to enhance feature representation<sup>v</sup>.

The MLP head takes the encoded features and performs additional transformations and computations to produce the final predictions. It typically includes multiple layers with nonlinear activation functions to learn complex decision boundaries<sup>vi</sup>.

Patch + Position embedding<sup>vii</sup> is used to provide spatial information<sup>viii</sup> to the model. It combines the patch embeddings with positional encodings, which encode the spatial location of each patch. This enables the model to understand the arrangement and context of patches within the image, improving its ability to recognize objects and understand the image's structure.

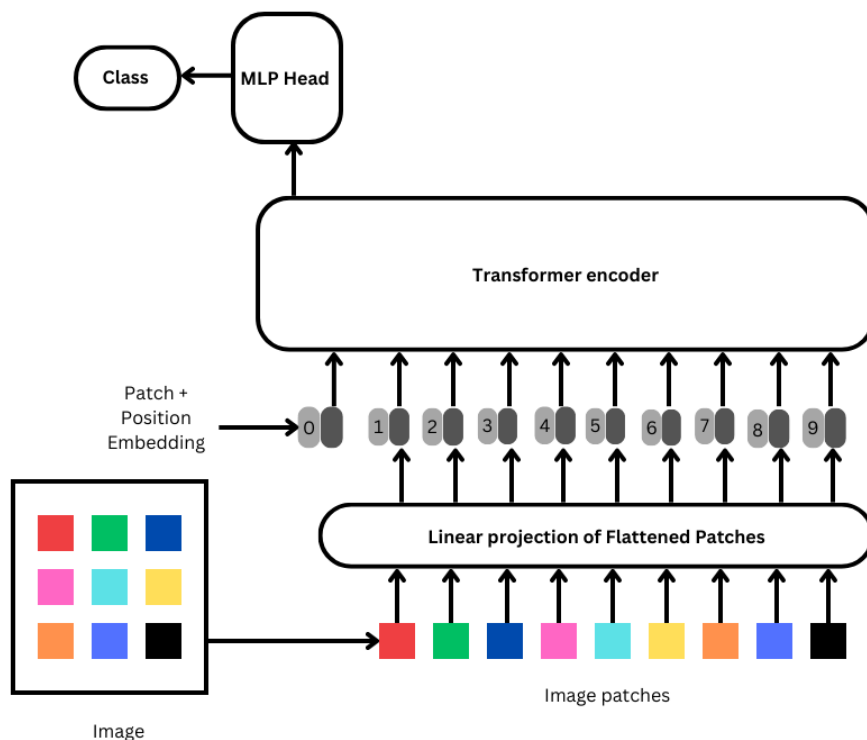

Table S1. Hausdorff's Distance Data table of native scans (Lab scanner considered standard)

| Sample           | IOS1 + OP1  |           | IOS1 + OP2  |           | IOS2 + OP1  |           | IOS2 + OP2  |           |
|------------------|-------------|-----------|-------------|-----------|-------------|-----------|-------------|-----------|
|                  | <i>Mean</i> | <i>SD</i> | <i>Mean</i> | <i>SD</i> | <i>Mean</i> | <i>SD</i> | <i>Mean</i> | <i>SD</i> |
| 3D printed lower | 0.67        | 2.00      | 0.77        | 1.33      | 2.01        | 2.66      | 2.28        | 2.27      |
| 3D printed upper | 0.52        | 1.22      | 0.47        | 1.11      | 2.78        | 0.72      | 0.68        | 1.41      |
| 01 Lower         | 0.06        | 0.29      | 0.25        | 0.59      | 0.12        | 0.59      | 1.04        | 2.17      |
| 01 Upper         | 0.01        | 0.10      | 0.29        | 0.83      | 0.12        | 0.60      | 0.18        | 0.65      |
| 02 Lower         | 0.03        | 0.16      | 0.38        | 0.60      | 0.09        | 0.25      | 0.11        | 0.25      |
| 02 Upper         | 0.00        | 0.03      | 0.21        | 0.44      | 0.30        | 0.66      | 0.12        | 0.28      |
| 03 Lower         | 0.39        | 0.74      | 0.81        | 1.92      | 0.66        | 1.34      | 0.16        | 0.35      |
| 03 Upper         | 0.08        | 0.22      | 0.31        | 0.99      | 0.01        | 0.07      | 0.04        | 0.13      |
| 04 Lower         | 0.00        | 0.03      | 0.17        | 0.48      | 0.01        | 0.08      | 0.00        | 0.05      |
| 04 Upper         | 0.00        | 0.03      | 0.20        | 0.71      | 0.01        | 0.08      | 0.12        | 0.64      |
| 05 Lower         | 0.00        | 0.04      | 0.00        | 0.05      | 0.01        | 0.05      | 0.05        | 0.26      |
| 05 Upper         | 0.64        | 2.55      | 0.02        | 0.11      | 0.05        | 0.14      | 0.02        | 0.08      |
| 06 Lower         | 0.09        | 0.26      | 0.02        | 0.10      | 0.02        | 0.09      | 0.00        | 0.05      |
| 06 Upper         | 0.00        | 0.03      | 0.00        | 0.03      | 0.01        | 0.06      | 0.02        | 0.07      |
| 07 Lower         | 0.09        | 0.30      | 0.01        | 0.06      | 0.00        | 0.06      | -0.00       | 0.11      |
| 07 Upper         | 0.00        | 0.11      | 0.00        | 0.12      | 0.01        | 0.13      | 0.06        | 0.31      |
| 08 Lower         | 0.02        | 0.12      | 0.01        | 0.43      | 0.00        | 0.07      | 0.01        | 0.06      |
| 08 Upper         | 0.08        | 0.33      | 0.01        | 0.04      | -0.01       | 0.06      | 0.00        | 0.06      |
| 09 Lower         | 0.05        | 0.23      | 0.01        | 0.07      | 0.00        | 0.05      | -0.01       | 0.09      |
| 09 Upper         | 0.07        | 0.38      | 0.00        | 0.06      | -0.00       | 0.09      | 0.00        | 0.06      |
| 10 Lower         | 0.18        | 0.53      | 0.00        | 0.03      | 0.01        | 0.08      | 0.00        | 0.07      |
| 10 Upper         | 0.09        | 0.28      | 0.00        | 0.04      | 0.02        | 0.09      | 0.01        | 0.07      |

Table S2. Hausdorff's Distance Data table of augmented scans (Lab scanner considered standard)

| Sample           | IOS1 + OP1  |           | IOS1 + OP2  |           | IOS2 + OP1  |           | IOS2 + OP2  |           |
|------------------|-------------|-----------|-------------|-----------|-------------|-----------|-------------|-----------|
|                  | <i>Mean</i> | <i>SD</i> | <i>Mean</i> | <i>SD</i> | <i>Mean</i> | <i>SD</i> | <i>Mean</i> | <i>SD</i> |
| 3D printed lower | 0.85        | 0.88      | 0.91        | 0.96      | 1.13        | 1.06      | 1.22        | 1.12      |
| 3D printed upper | 0.64        | 1.21      | 0.58        | 1.15      | 0.32        | 0.74      | 0.55        | 1.11      |
| 01 Lower         | 0.25        | 0.49      | 0.15        | 0.43      | 0.03        | 0.17      | 0.16        | 0.43      |
| 01 Upper         | 0.42        | 0.68      | 0.40        | 0.70      | 0.82        | 1.01      | 0.03        | 0.19      |
| 02 Lower         | 0.06        | 0.27      | 0.04        | 0.24      | 0.05        | 0.22      | 0.02        | 0.13      |
| 02 Upper         | 0.00        | 0.10      | 0.02        | 0.13      | 0.25        | 0.49      | 0.00        | 0.05      |
| 03 Lower         | 0.07        | 0.31      | 0.28        | 0.64      | 0.02        | 0.13      | 0.47        | 0.69      |
| 03 Upper         | 0.03        | 0.19      | 0.03        | 0.17      | 0.09        | 0.31      | 0.01        | 0.11      |
| 04 Lower         | 0.06        | 0.32      | 0.17        | 0.49      | 0.15        | 0.47      | 0.09        | 0.34      |
| 04 Upper         | 0.00        | 0.06      | 0.04        | 0.26      | 0.25        | 0.58      | 0.09        | 0.41      |
| 05 Lower         | 0.33        | 0.74      | 0.13        | 0.44      | 0.31        | 0.63      | 0.06        | 0.26      |
| 05 Upper         | 0.04        | 0.24      | 0.03        | 0.18      | 0.05        | 0.27      | 0.01        | 0.11      |
| 06 Lower         | 0.27        | 0.57      | 0.04        | 0.20      | 0.05        | 0.26      | 0.07        | 0.30      |
| 06 Upper         | 0.16        | 0.50      | 0.02        | 0.16      | 0.00        | 0.06      | 0.03        | 0.23      |
| 07 Lower         | 0.04        | 0.21      | 0.04        | 0.27      | 0.19        | 0.51      | 0.20        | 0.52      |
| 07 Upper         | 0.02        | 0.29      | 0.01        | 0.14      | 0.01        | 0.11      | 0.01        | 0.12      |
| 08 Lower         | 0.22        | 0.57      | 0.03        | 0.21      | 0.26        | 0.67      | 0.23        | 0.64      |
| 08 Upper         | 0.18        | 0.55      | 0.01        | 0.09      | 0.02        | 0.19      | 0.00        | 0.06      |
| 09 Lower         | 0.01        | 0.07      | 0.05        | 0.29      | 0.09        | 0.31      | 0.05        | 0.29      |
| 09 Upper         | 0.00        | 0.07      | 0.00        | 0.09      | 0.00        | 0.80      | 0.00        | 0.06      |
| 10 Lower         | 0.01        | 0.11      | 0.04        | 0.28      | 0.01        | 0.15      | 0.06        | 0.31      |
| 10 Upper         | 0.04        | 0.23      | 0.02        | 0.14      | 0.00        | 0.08      | 0.02        | 0.16      |



Table S3. Hausdorff's Distance Data table comparing native dataset vs augmented dataset

| Sample              | <b>IOS1 + OP1</b> |           | <b>IOS1 + OP2</b> |           | <b>IOS2 + OP1</b> |           | <b>IOS2 + OP2</b> |           |
|---------------------|-------------------|-----------|-------------------|-----------|-------------------|-----------|-------------------|-----------|
|                     | <i>Mean</i>       | <i>SD</i> | <i>Mean</i>       | <i>SD</i> | <i>Mean</i>       | <i>SD</i> | <i>Mean</i>       | <i>SD</i> |
| Standard Scan Lower | -0.01             | 1.27      | -0.19             | 0.56      | -0.25             | 0.24      | -0.25             | 0.26      |
| Standard Scan Upper | -0.24             | 0.24      | -0.25             | 0.24      | -0.25             | 0.25      | -0.25             | 0.25      |
| 01 Lower            | -0.34             | 1.03      | -0.19             | 0.62      | -0.25             | 0.24      | -0.25             | 0.25      |
| 01 Upper            | -0.28             | 0.91      | -0.15             | 0.31      | -0.25             | 0.25      | -0.25             | 0.25      |
| 02 Lower            | -0.18             | 0.41      | -0.24             | 0.24      | 0.04              | 0.32      | -0.24             | 0.25      |
| 02 Upper            | -0.35             | 1.53      | -0.03             | 0.44      | -0.24             | 0.24      | -0.25             | 0.25      |
| 03 Lower            | -0.24             | 0.24      | -0.33             | 0.69      | -0.24             | 0.25      | -0.24             | 0.24      |
| 03 Upper            | -0.24             | 0.24      | -0.40             | 0.39      | -0.24             | 0.24      | -0.24             | 0.25      |
| 04 Lower            | -0.24             | 0.24      | -0.04             | 0.94      | 0.11              | 1.15      | -0.24             | 0.24      |
| 04 Upper            | -0.25             | 0.24      | -0.25             | 0.25      | -0.25             | 0.25      | -0.25             | 0.25      |
| 05 Lower            | -0.06             | 0.64      | 0.63              | 1.08      | -0.25             | 0.24      | -0.25             | 0.24      |
| 05 Upper            | -0.22             | 0.37      | 0.39              | 0.65      | -0.25             | 0.25      | -0.25             | 0.25      |
| 06 Lower            | -0.09             | 0.73      | -0.11             | 0.40      | -0.24             | 0.24      | -0.24             | 0.24      |
| 06 Upper            | -0.16             | 1.66      | -0.02             | 0.28      | -0.24             | 0.24      | -0.24             | 0.24      |
| 07 Lower            | -0.26             | 0.60      | -0.12             | 0.69      | -0.25             | 0.25      | -0.24             | 0.25      |
| 07 Upper            | -0.25             | 0.24      | -0.26             | 0.33      | -0.25             | 0.25      | -0.25             | 0.24      |
| 08 Lower            | -0.24             | 0.24      | -0.25             | 0.24      | -0.08             | 0.79      | -0.25             | 0.25      |
| 08 Upper            | -0.25             | 0.25      | -0.21             | 0.51      | -0.25             | 0.24      | -0.25             | 0.25      |
| 09 Lower            | -0.29             | 0.83      | -0.47             | 1.17      | -1.51             | 2.67      | -0.25             | 0.24      |
| 09 Upper            | -0.38             | 1.34      | -0.80             | 0.92      | -0.25             | 0.25      | -0.25             | 0.25      |
| 10 Lower            | -0.29             | 0.69      | -0.24             | 0.25      | -0.25             | 0.25      | -0.25             | 0.25      |
| 10 Upper            | -0.34             | 0.64      | 0.57              | 0.67      | -0.25             | 0.25      | -0.25             | 0.25      |

Table S4. Root mean square error (RMSE) value of native scans (Lab scanner considered standard)

| <b>Sample</b>    | <b>IOS1 + OP1</b> | <b>IOS1 + OP2</b> | <b>IOS2 + OP1</b> | <b>IOS2 + OP2</b> |
|------------------|-------------------|-------------------|-------------------|-------------------|
| 3D printed lower | 45.592983         | 38.9476           | 31.056149         | 32.168015         |
| 3D printed upper | 42.052273         | 37.73743          | 35.311436         | 39.21446          |
| 01 Lower         | 23.070724         | 26.402708         | 35.60772          | 33.52077          |
| 01 Upper         | 31.969397         | 31.011934         | 32.658222         | 32.65341          |
| 02 Lower         | 23.083122         | 29.666405         | 27.338987         | 27.462332         |
| 02 Upper         | 26.099634         | 27.454845         | 25.079912         | 32.09955          |
| 03 Lower         | 29.106987         | 29.765272         | 24.014301         | 24.339241         |
| 03 Upper         | 32.56765          | 29.22785          | 32.80361          | 27.956861         |
| 04 Lower         | 33.072926         | 31.765627         | 24.806719         | 31.952013         |
| 04 Upper         | 32.69865          | 32.925186         | 32.43568          | 34.8358           |
| 05 Lower         | 23.372362         | 28.37013          | 33.99208          | 28.571321         |
| 05 Upper         | 34.46011          | 34.004467         | 36.85757          | 28.254255         |
| 06 Lower         | 36.63631          | 32.888386         | 29.925455         | 33.902706         |
| 06 Upper         | 32.107513         | 35.434784         | 35.682487         | 34.608845         |
| 07 Lower         | 39.02781          | 38.91666          | 35.74593          | 36.64801          |
| 07 Upper         | 32.42329          | 38.787815         | 42.57793          | 44.75692          |
| 08 Lower         | 44.34486          | 43.341362         | 36.067356         | 34.568687         |
| 08 Upper         | 38.134407         | 42.669678         | 36.4228           | 38.708588         |
| 09 Lower         | 44.88963          | 36.243538         | 40.705765         | 41.046017         |
| 09 Upper         | 42.817547         | 43.990326         | 42.82798          | 40.398357         |
| 10 Lower         | 40.534733         | 40.532368         | 35.96939          | 38.32908          |
| 10 Upper         | 42.13337          | 43.919724         | 31.883114         | 39.756035         |

Table S5. Root mean square error (RMSE) value of augmented scans (Lab scanner considered standard)

| <b>Sample</b>    | <b>IOS1 + OP1</b> | <b>IOS1 + OP2</b> | <b>IOS2 + OP1</b> | <b>IOS2 + OP2</b> |
|------------------|-------------------|-------------------|-------------------|-------------------|
| 3D printed lower | 40.876526         | 35.67165          | 38.4983           | 41.759415         |
| 3D printed upper | 37.7054           | 37.7874           | 36.2992           | 33.30922          |
| 01 Lower         | 29.085054         | 30.982618         | 29.137104         | 28.051573         |
| 01 Upper         | 29.311043         | 31.835842         | 30.377565         | 28.87961          |
| 02 Lower         | 25.306435         | 24.397924         | 28.33862          | 26.252106         |
| 02 Upper         | 24.893188         | 26.910402         | 26.556591         | 25.77872          |
| 03 Lower         | 28.179375         | 26.505123         | 26.551205         | 28.077421         |
| 03 Upper         | 27.749464         | 29.717903         | 28.262337         | 27.2906           |
| 04 Lower         | 28.944967         | 30.578037         | 27.357243         | 26.916603         |
| 04 Upper         | 28.906042         | 32.10417          | 30.43464          | 28.674036         |
| 05 Lower         | 27.283772         | 30.540447         | 27.920826         | 28.335173         |
| 05 Upper         | 28.718754         | 29.854498         | 30.50984          | 27.815712         |
| 06 Lower         | 36.119183         | 36.08557          | 29.566982         | 30.200222         |
| 06 Upper         | 32.807705         | 33.448742         | 31.276346         | 32.635025         |
| 07 Lower         | 33.718903         | 41.9308           | 37.44348          | 41.159588         |
| 07 Upper         | 41.12976          | 38.338356         | 35.214233         | 37.727325         |
| 08 Lower         | 42.583145         | 38.304127         | 34.7351           | 39.37779          |
| 08 Upper         | 39.3416           | 40.844105         | 34.54722          | 37.043526         |
| 09 Lower         | 33.9195           | 37.704353         | 34.870102         | 36.272152         |
| 09 Upper         | 42.10982          | 41.194107         | 38.42807          | 38.704857         |
| 10 Lower         | 35.2847           | 31.48099          | 33.068676         | 28.518589         |
| 10 Upper         | 34.283962         | 35.07485          | 34.43549          | 33.76017          |

Heatmaps of Native scans generated through Hausdorff's distance evaluation

IOS1 + OP1

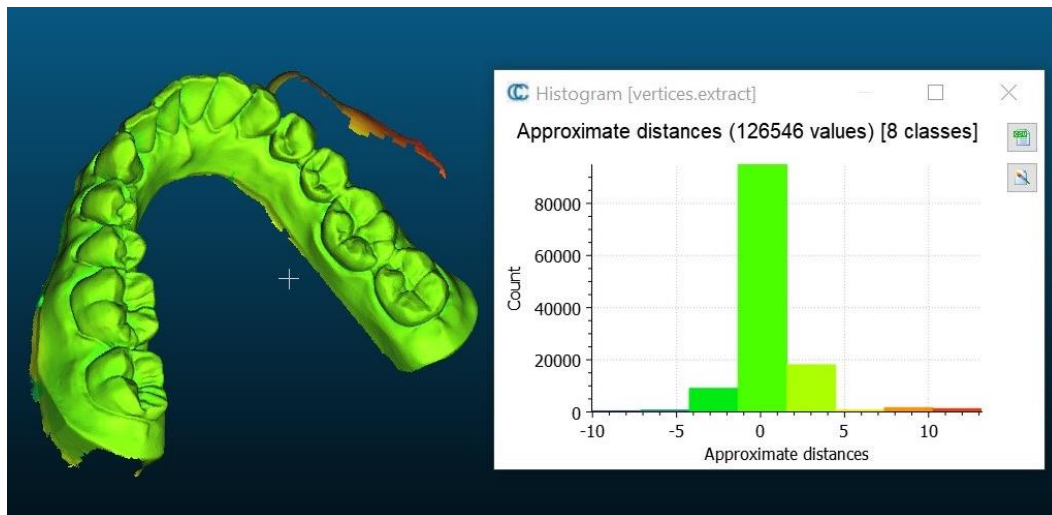

Fig 1: J standard model lower jaw.

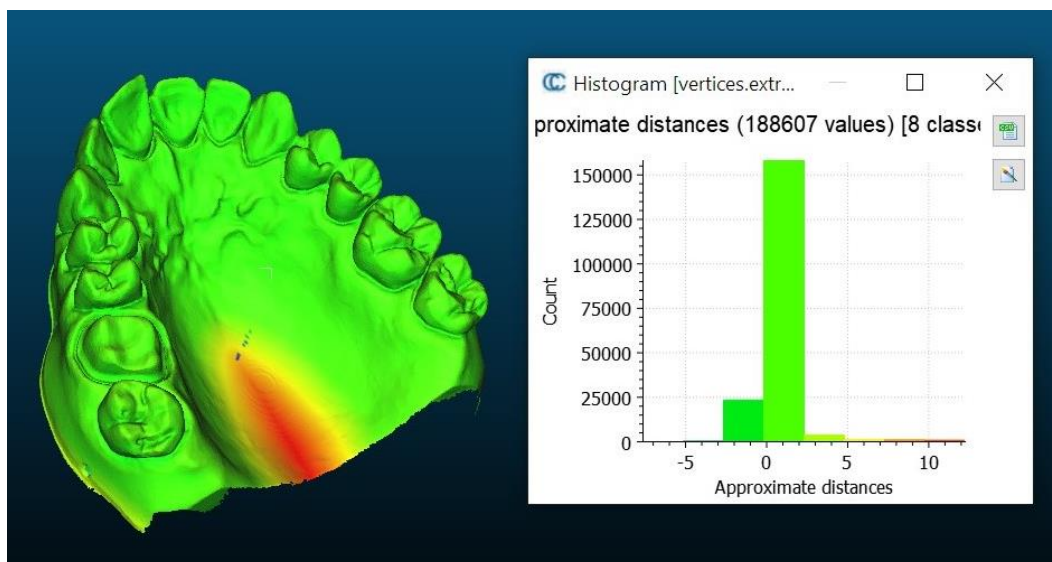

Fig 2: J standard model upper jaw .

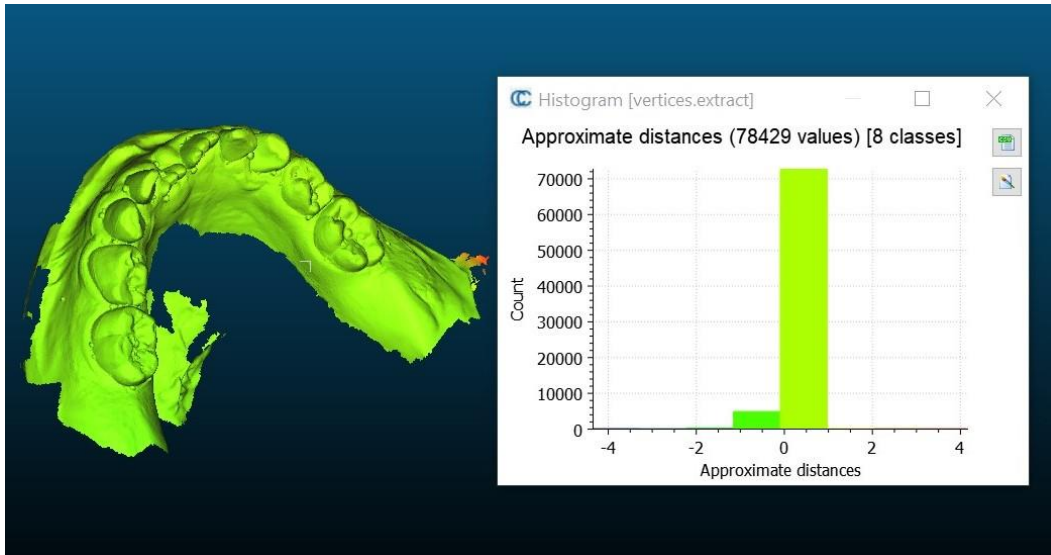

Fig 3: J01 lower jaw .

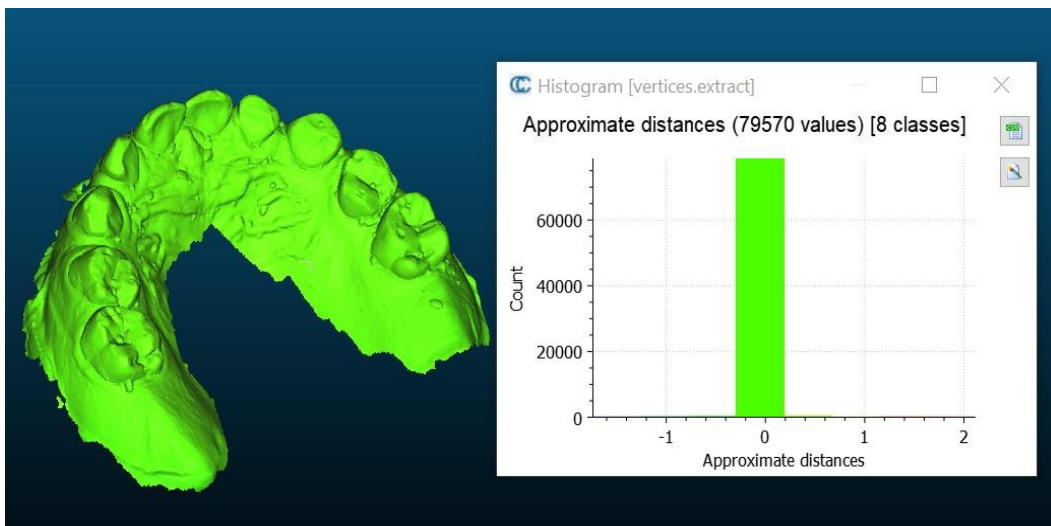

Fig 4: J01 upper jaw .

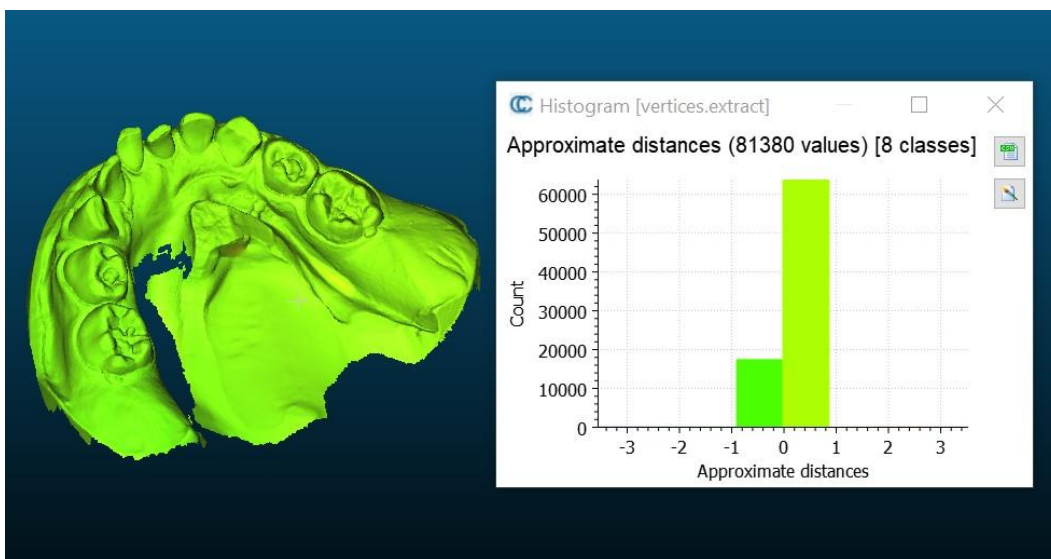

Fig 5: J02 lower jaw .

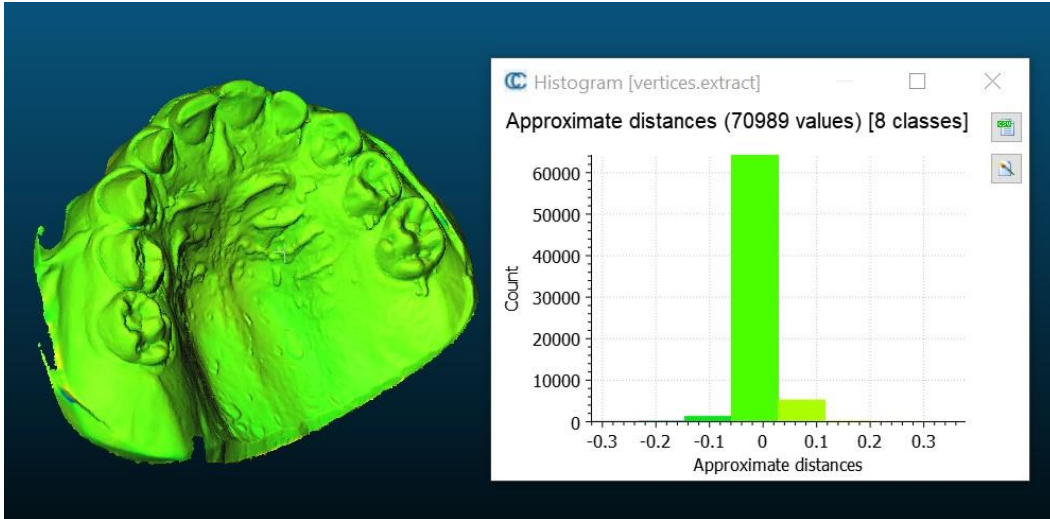

Fig 6: J02 upper jaw .

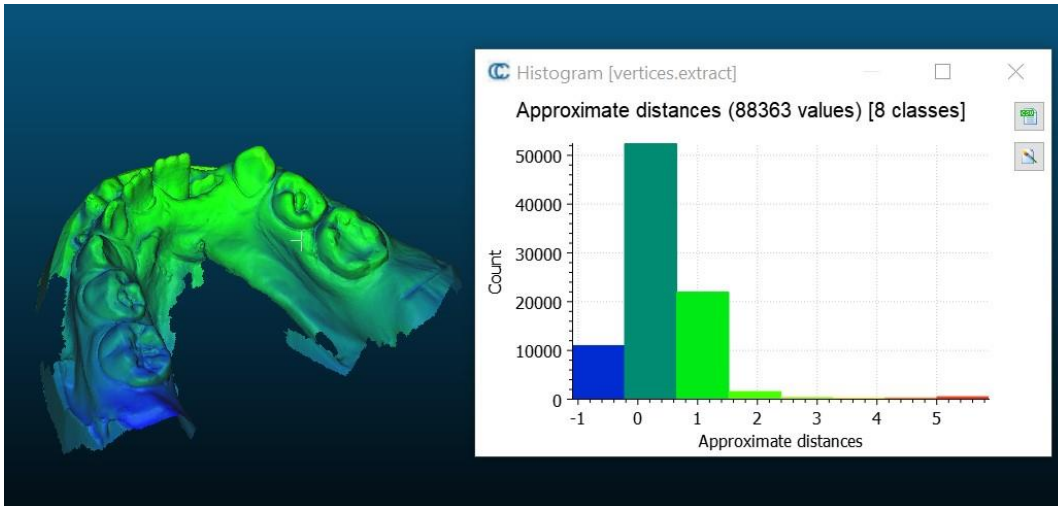

Fig 7: J03 lower jaw .

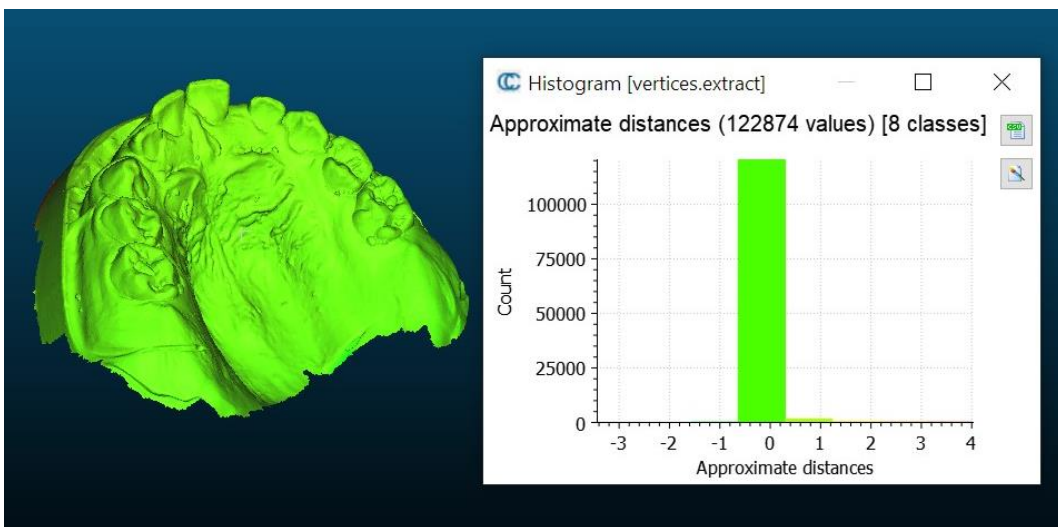

Fig 8: J03 upper jaw .



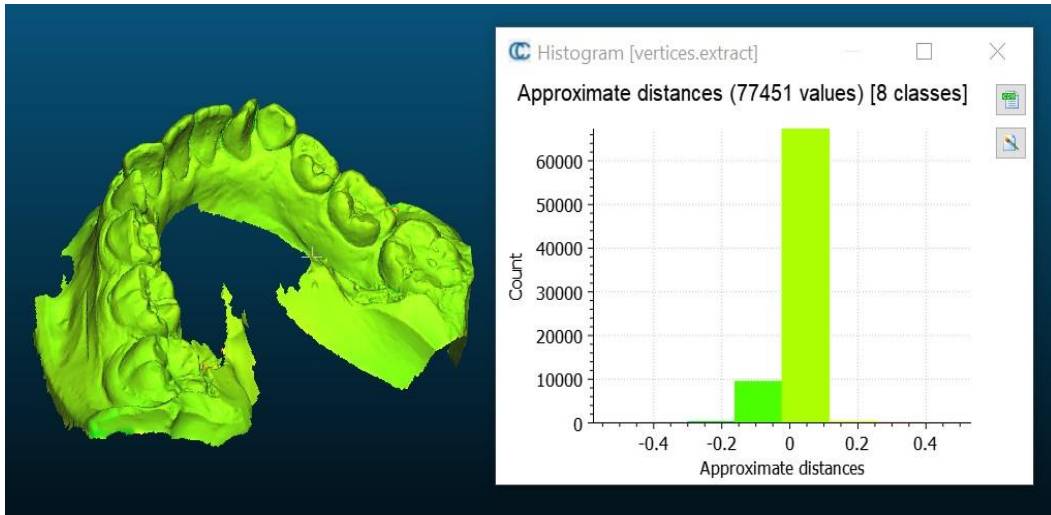

Fig 9: J04 lower jaw .

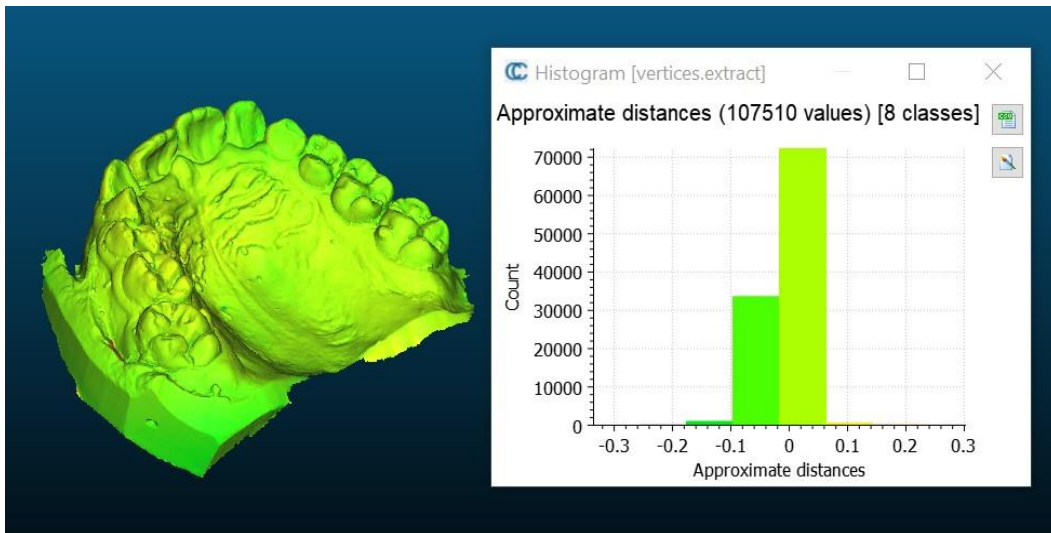

Fig 10: J04 upper jaw .

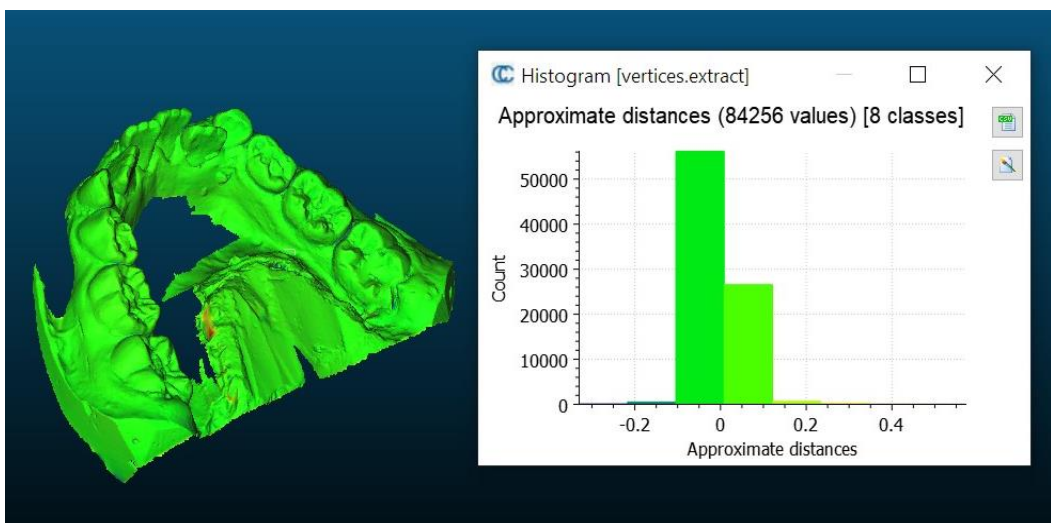

Fig 11: J05 lower jaw .

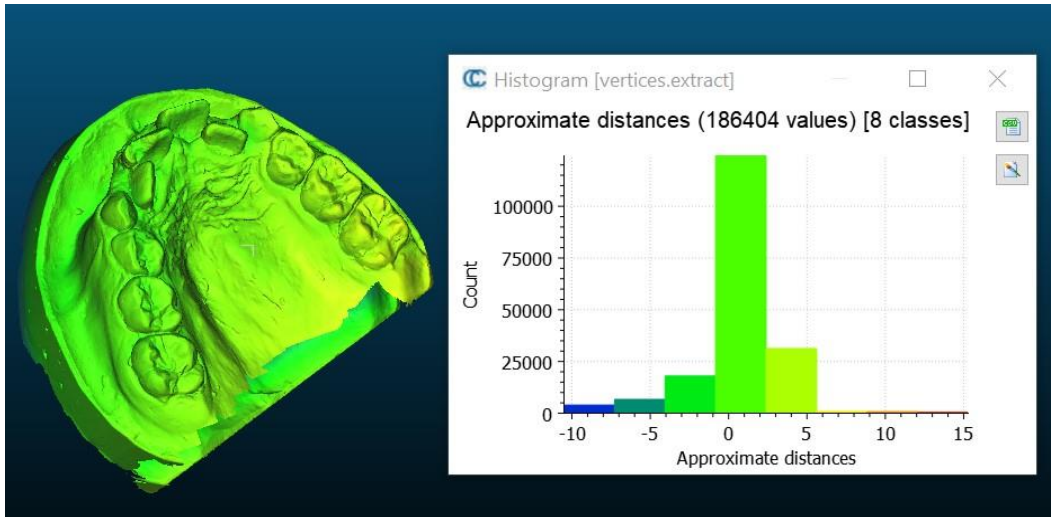

Fig 12: J05 upper jaw .

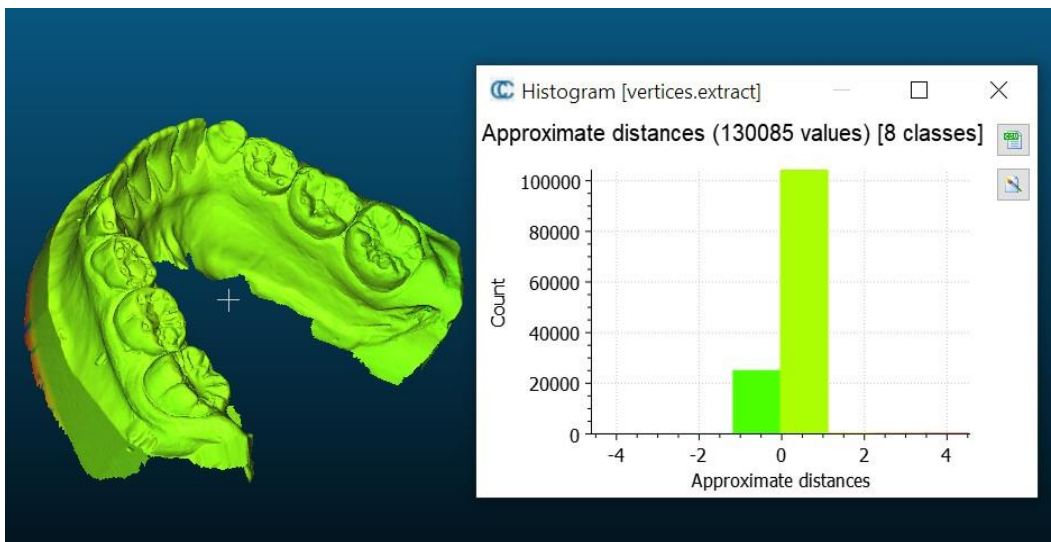

Fig 13: J06 lower jaw .

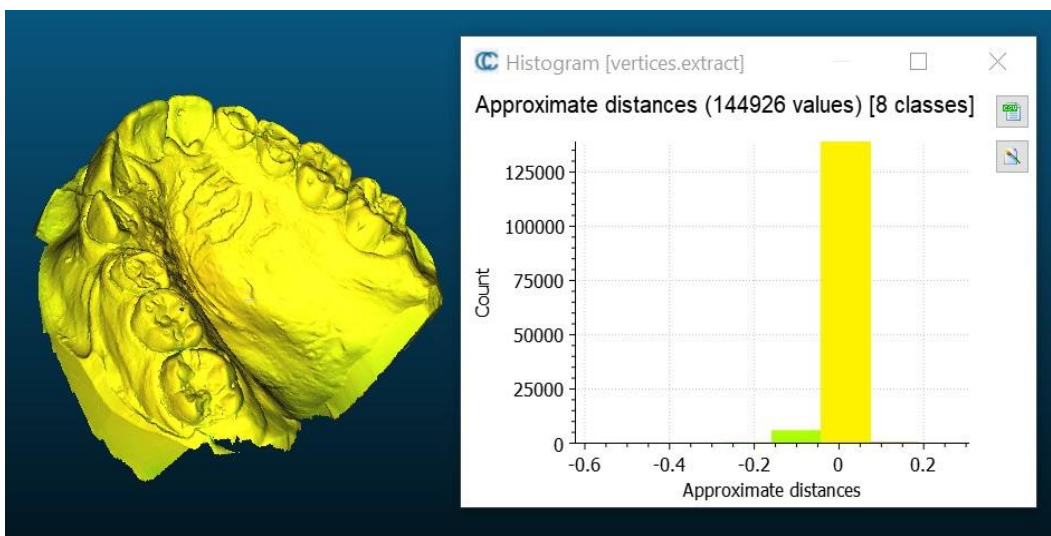

Fig 14: J06 upper jaw .



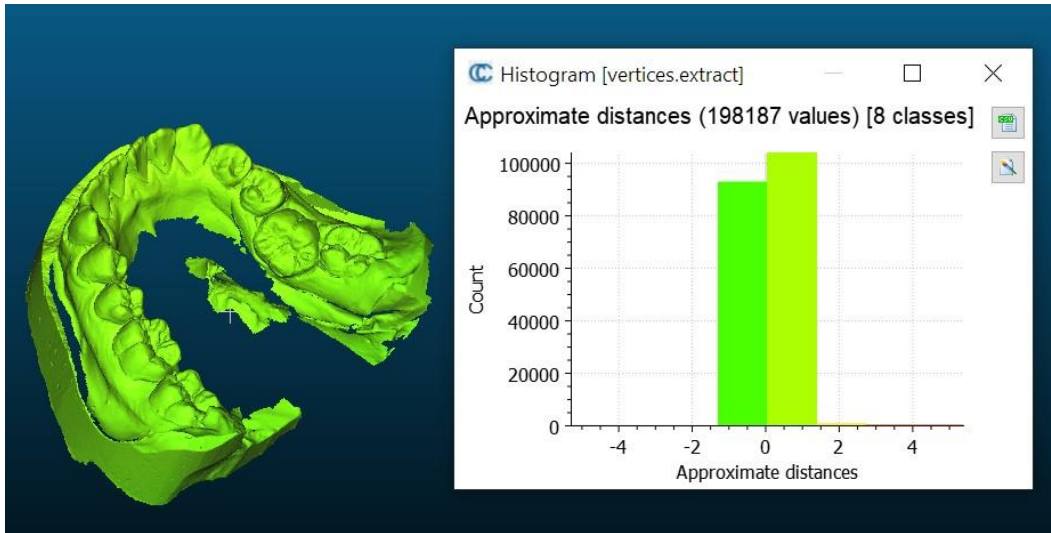

Fig 15: J07 lower jaw .

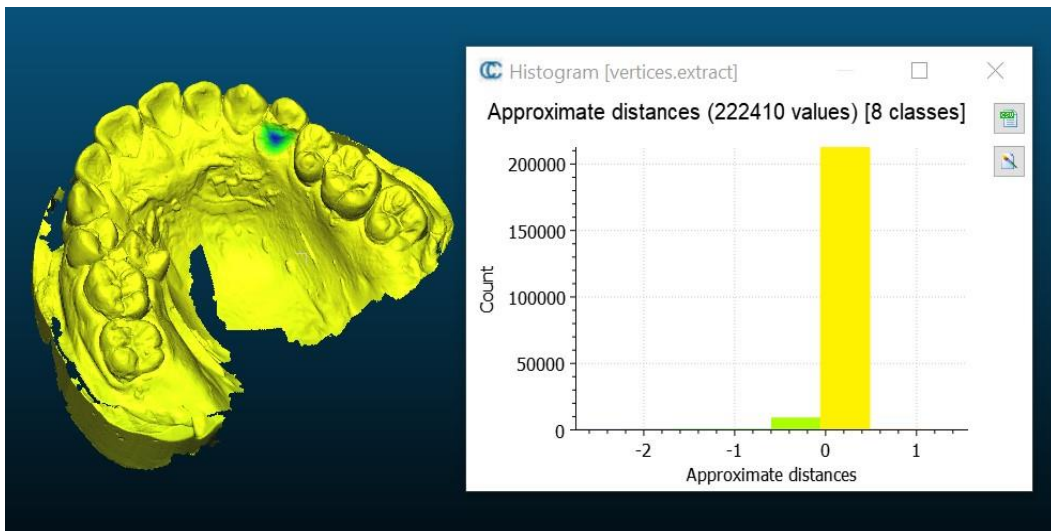

Fig 16: J07 upper jaw .

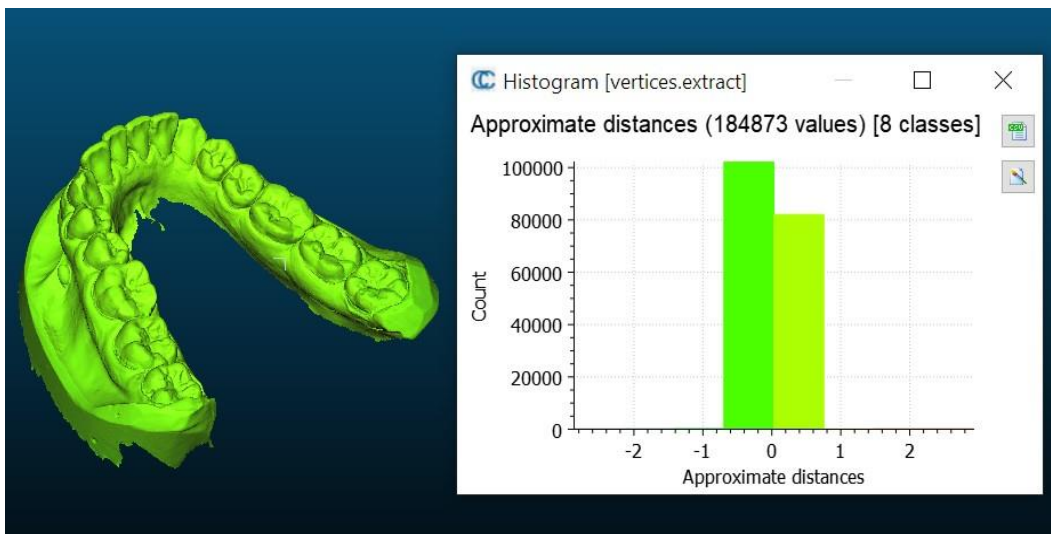

Fig 17: J08 lower jaw .

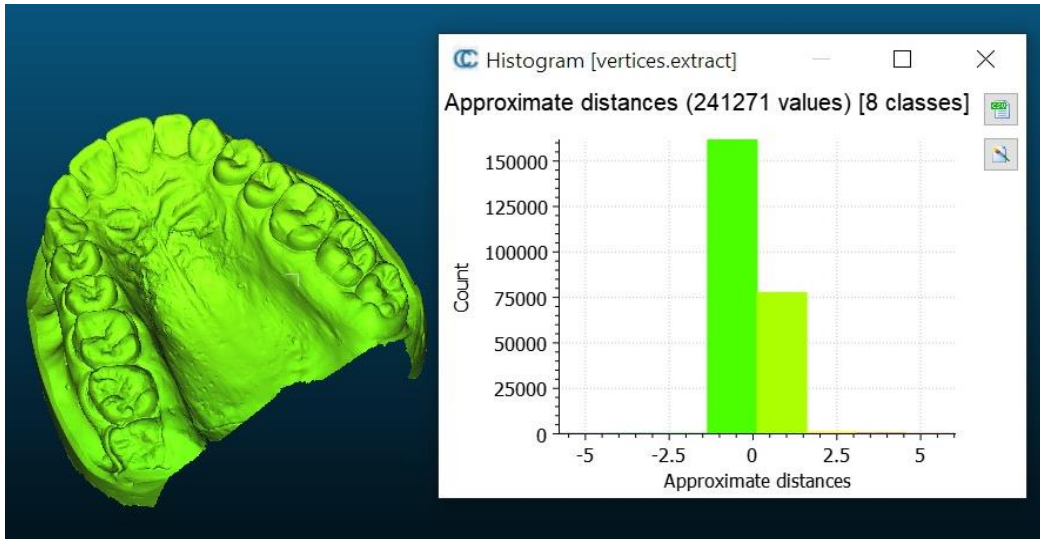

Fig 18: J08 upper jaw .

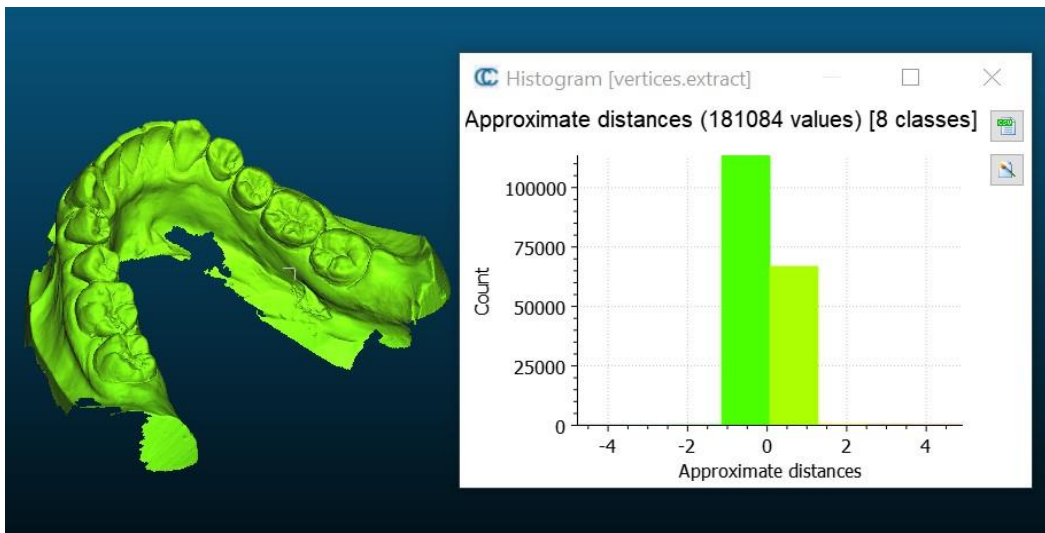

Fig 19: J09 lower jaw .

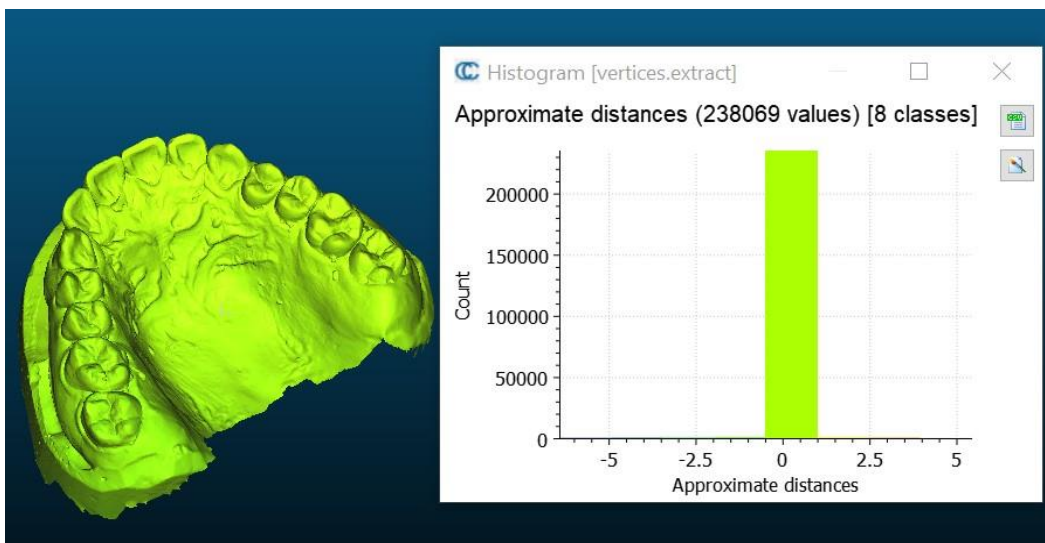

Fig 20: J09 upper jaw .

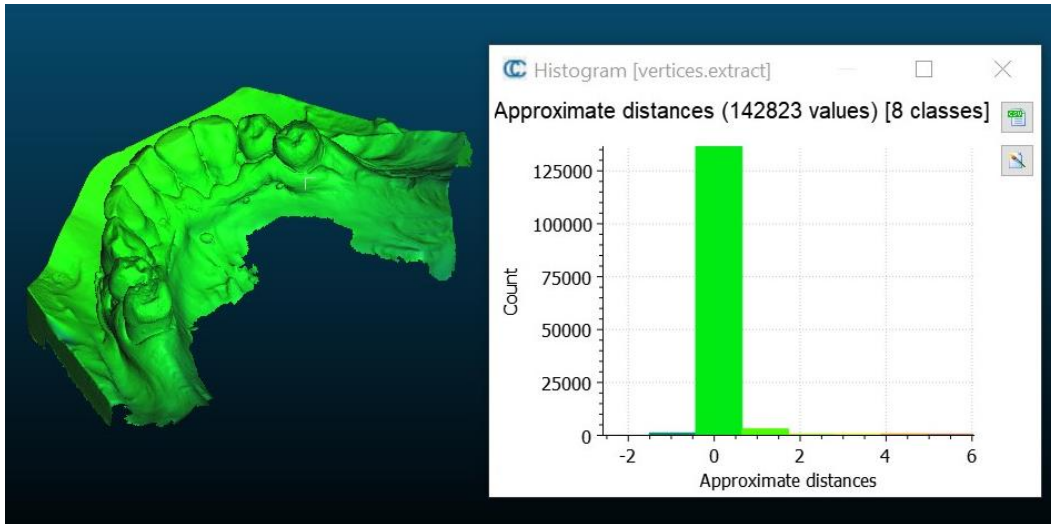

Fig 21: J10 lower jaw .

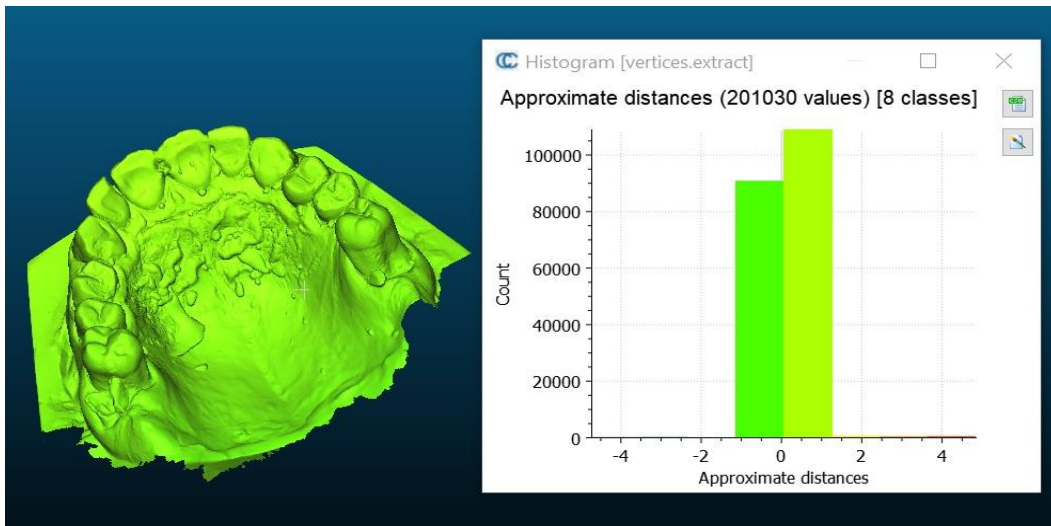

Fig 22: J10 upper jaw .

### IOS1 + OP2

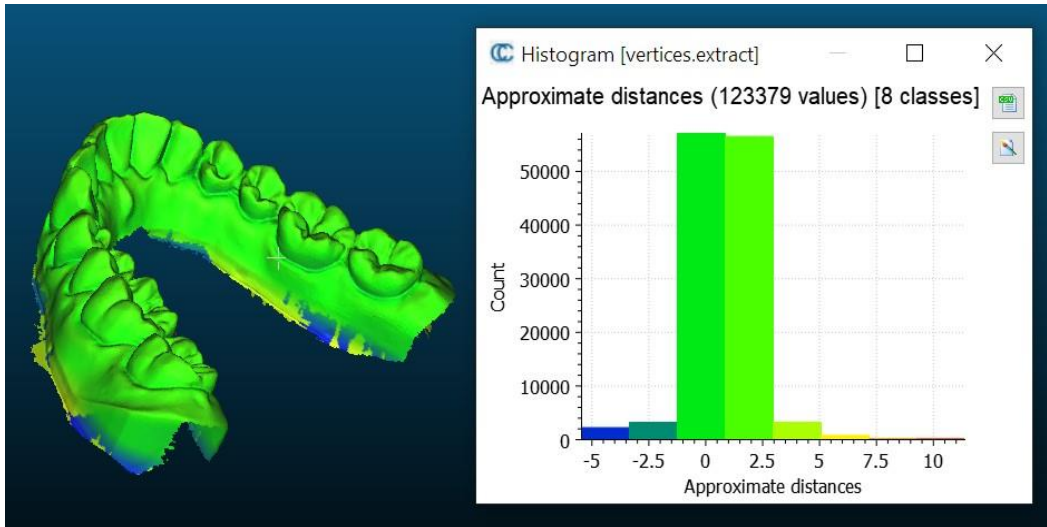

Fig 1: T standard model lower jaw .

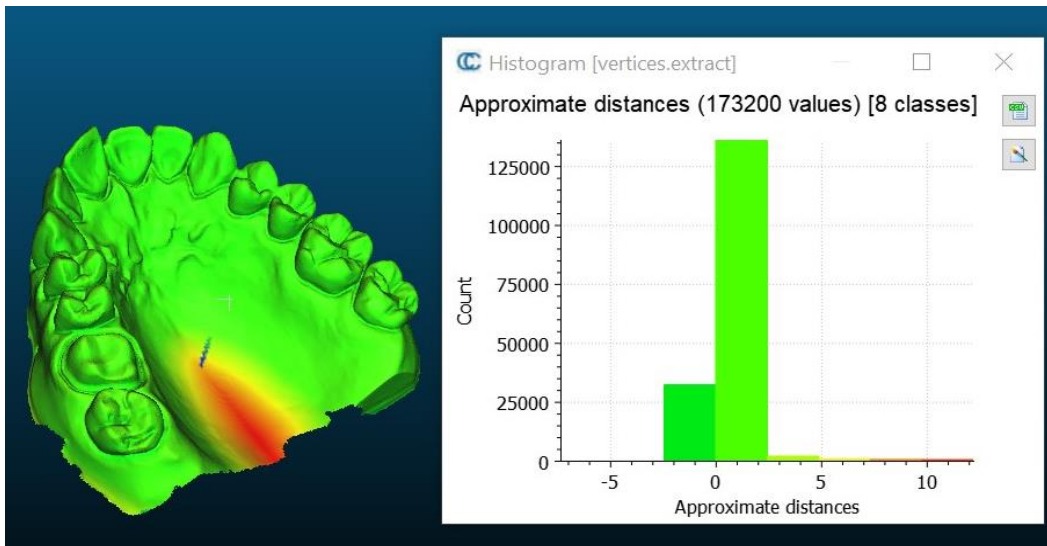

Fig 2: T standard model upper jaw .

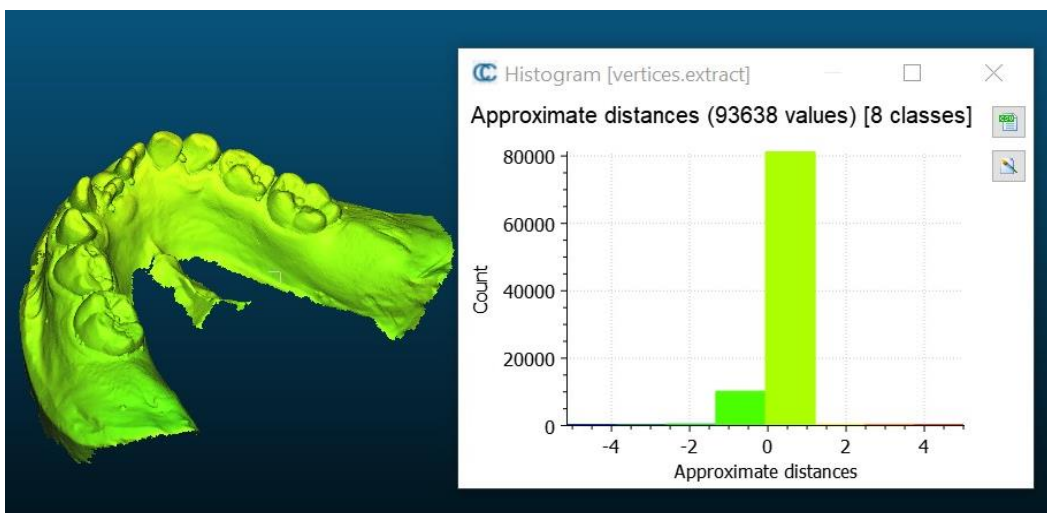

Fig 3: T01 lower jaw .



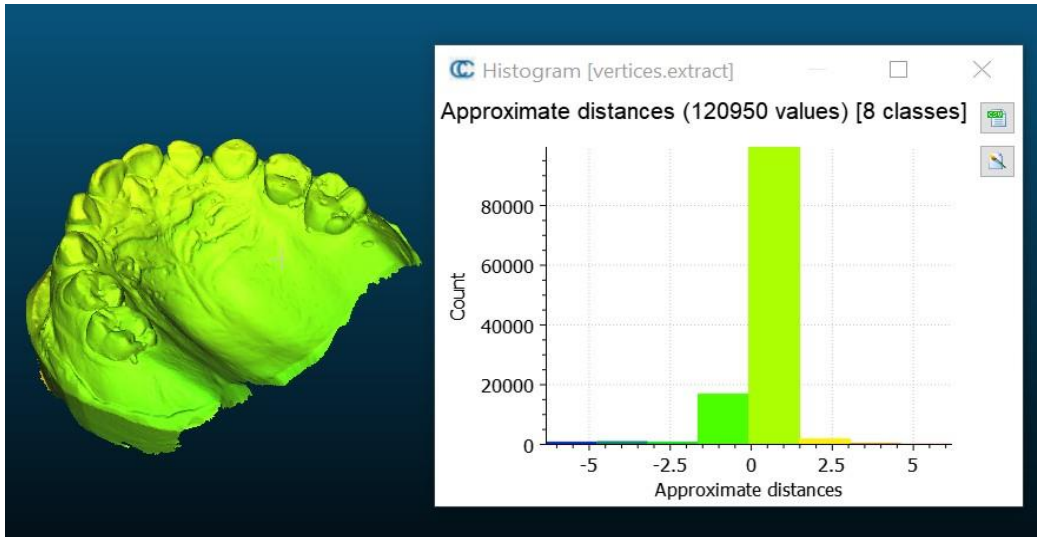

Fig 4: T01 upper jaw .

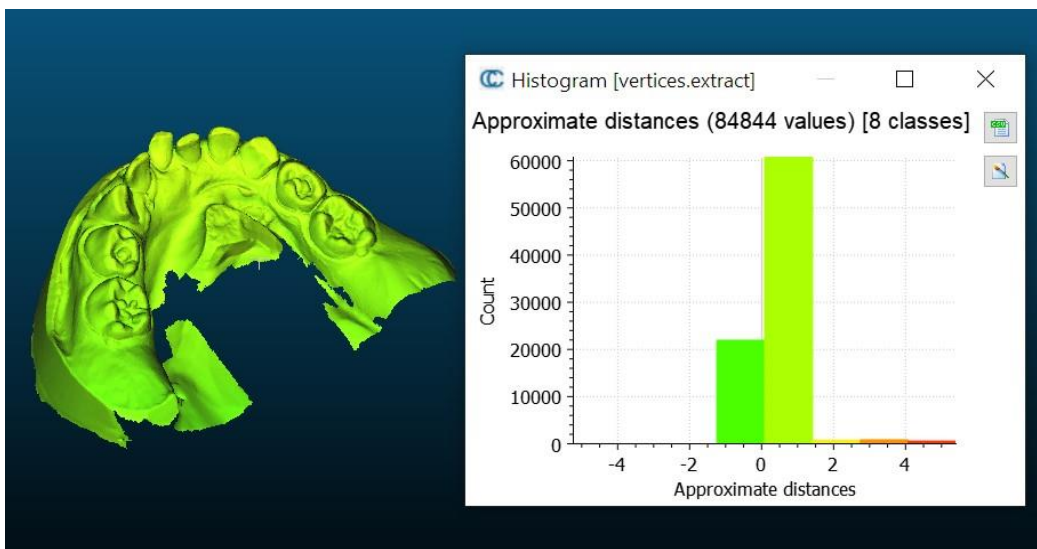

Fig 5: T02 lower jaw .

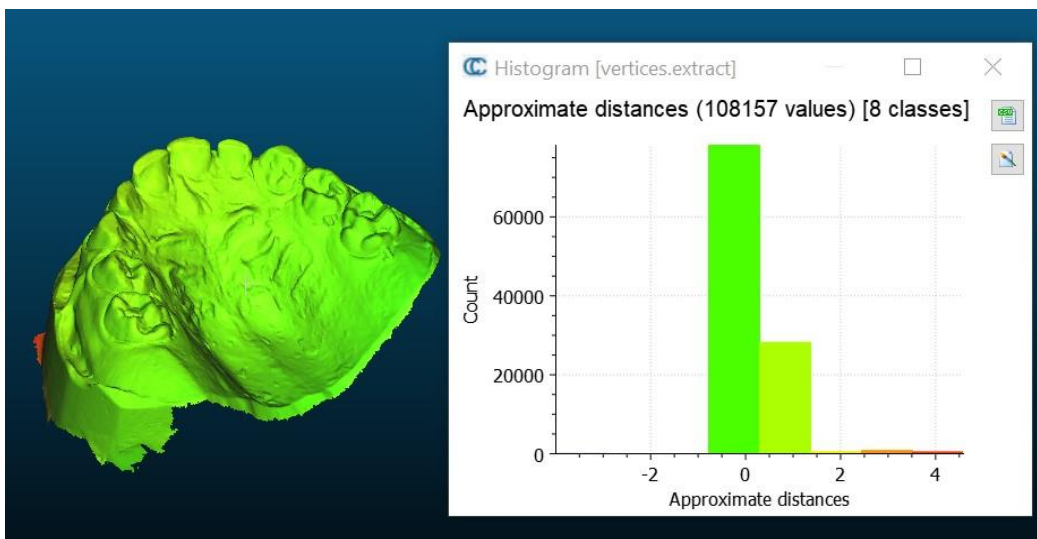

Fig 6: T02 upper jaw .

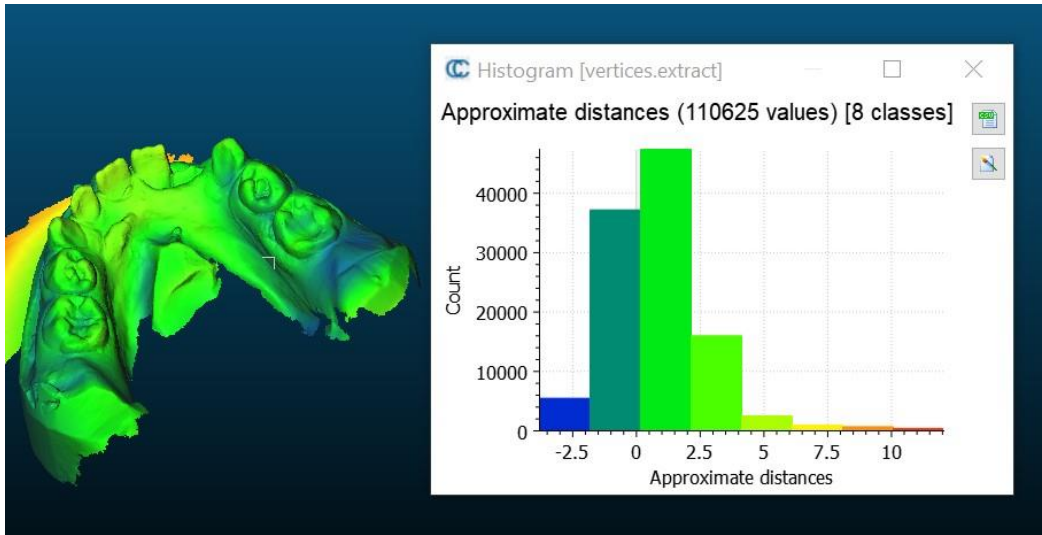

Fig 7: T03 lower jaw .

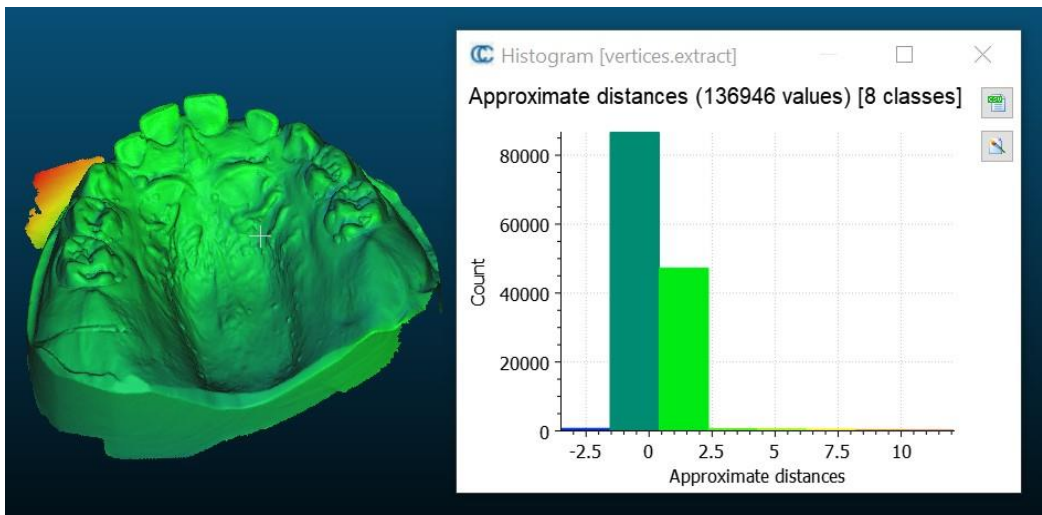

Fig 8: T03 upper jaw .

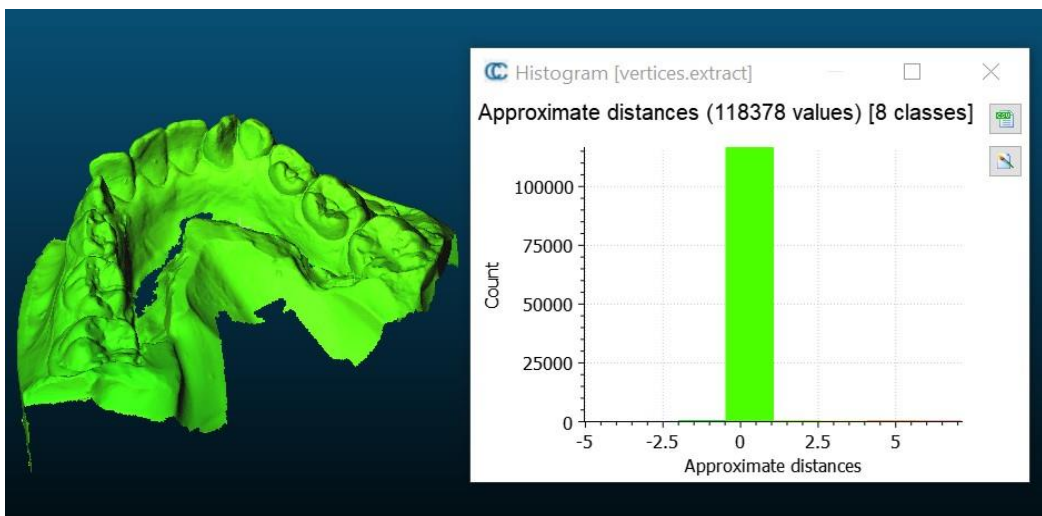

Fig 9: T04 lower jaw .

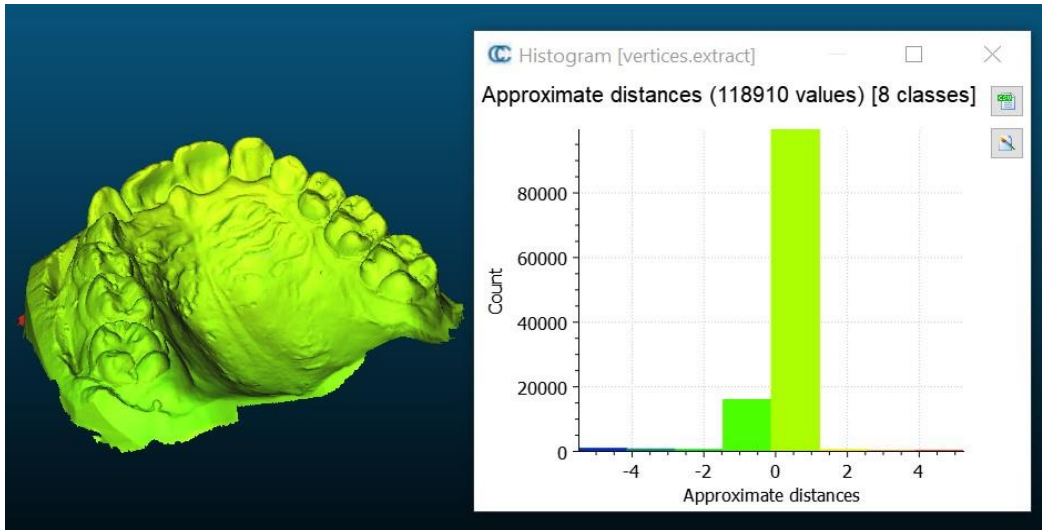

Fig 10: T04 upper jaw .

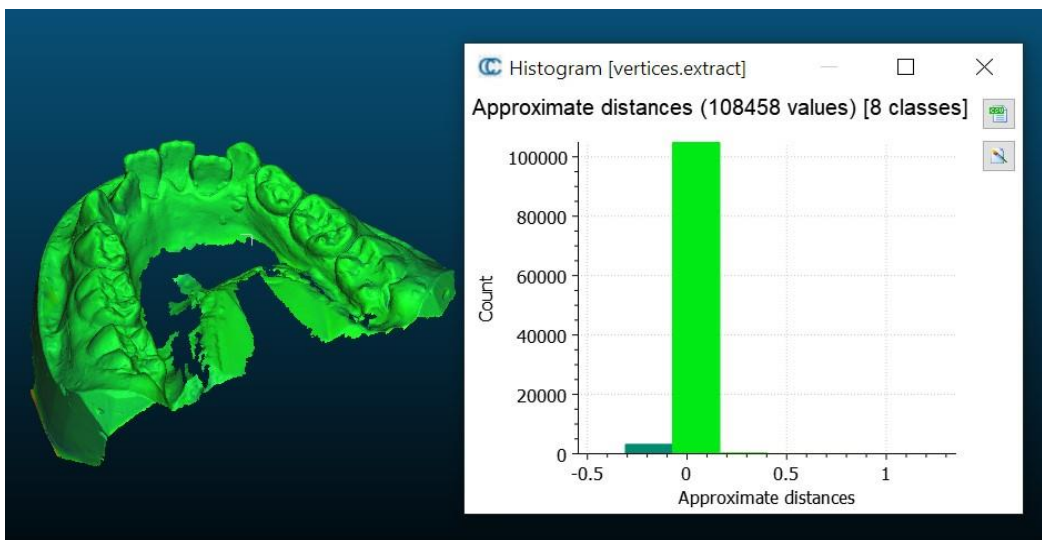

Fig 11: T05 lower jaw .

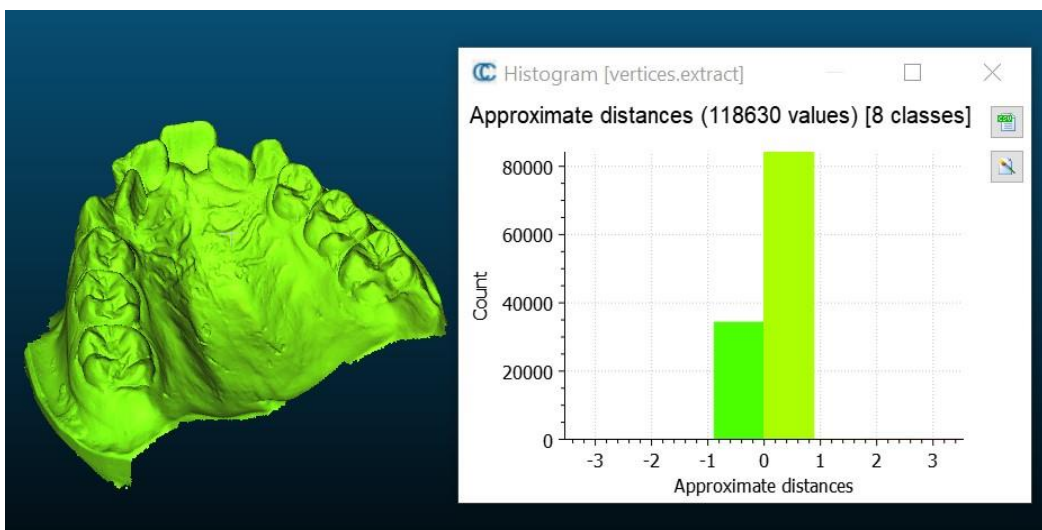

Fig 12: T05 upper jaw .

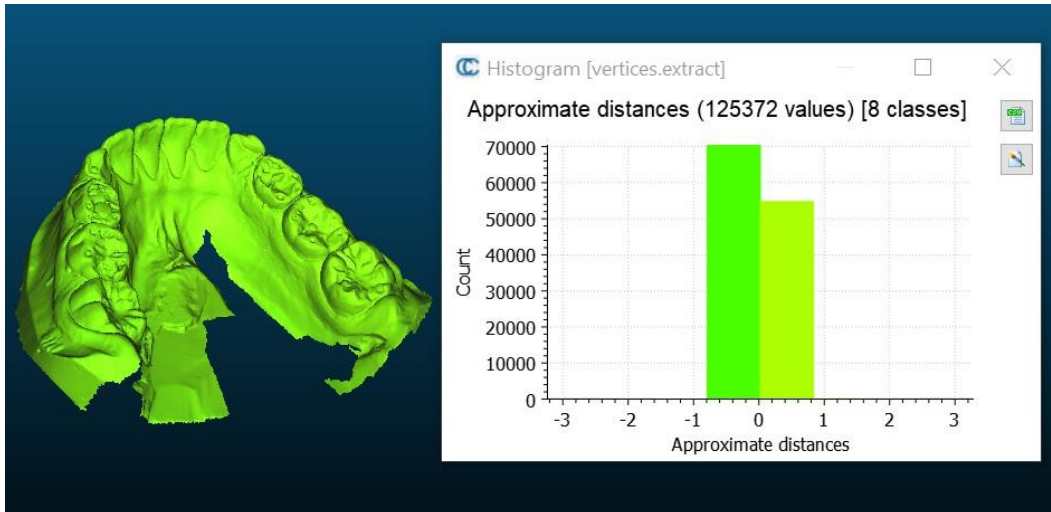

Fig 13: T06 lower jaw .

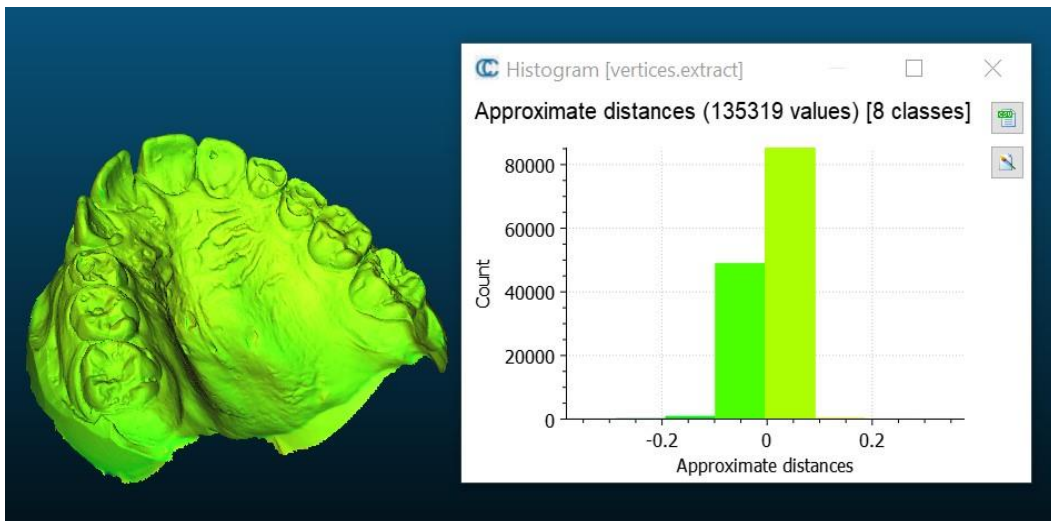

Fig 14: T06 upper jaw .

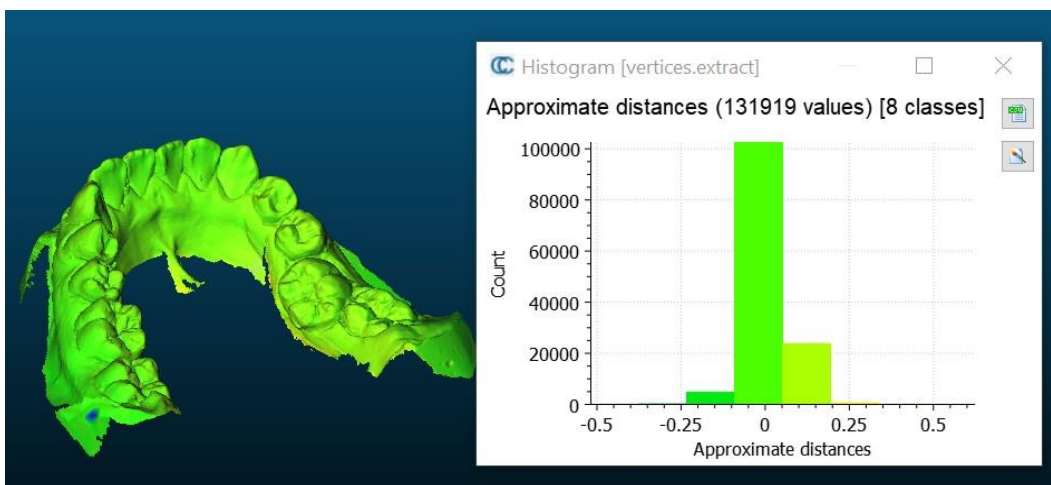

Fig 15: T07 lower jaw .



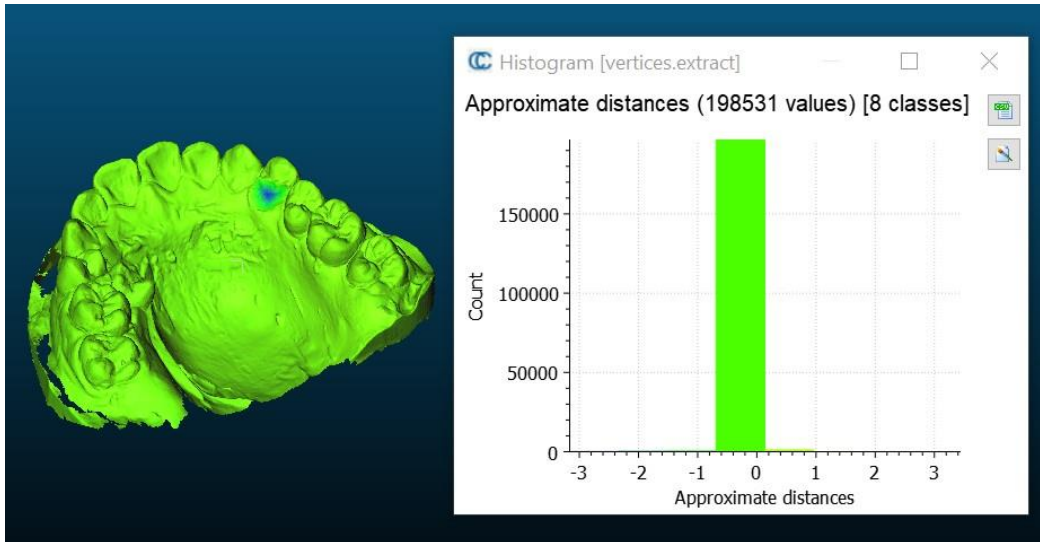

Fig 16: T07 upper jaw .

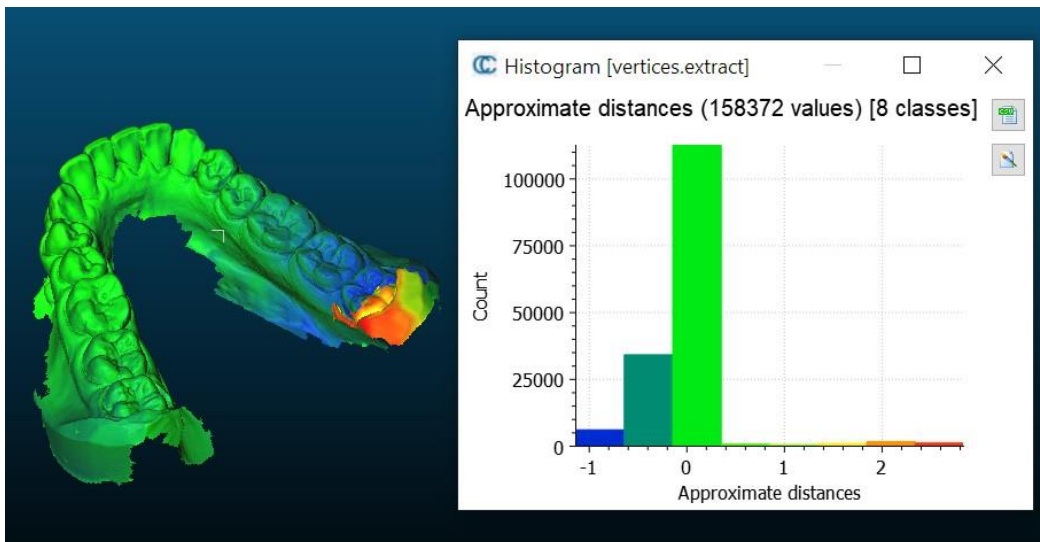

Fig 17: T08 lower jaw .

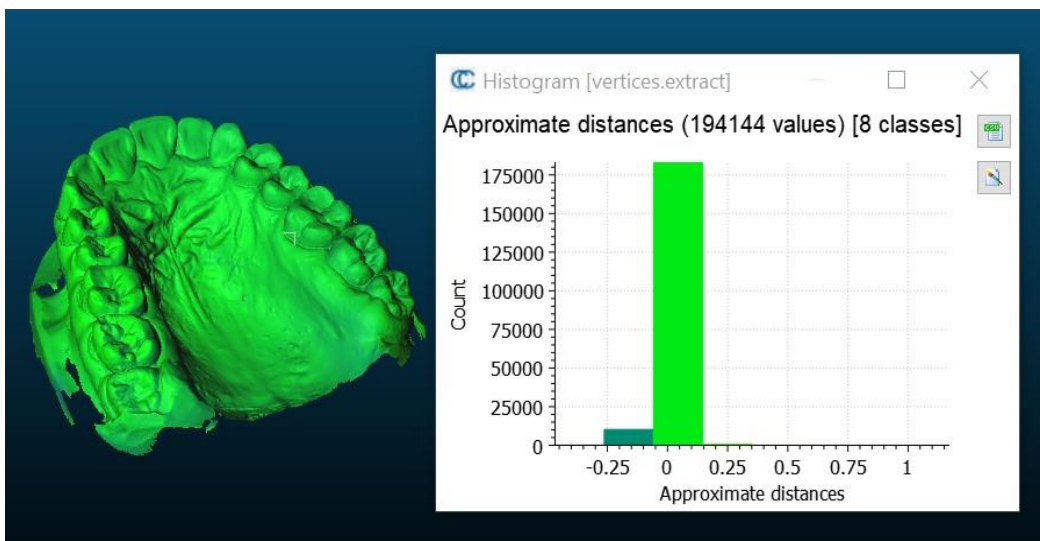

Fig 18: T08 upper jaw .

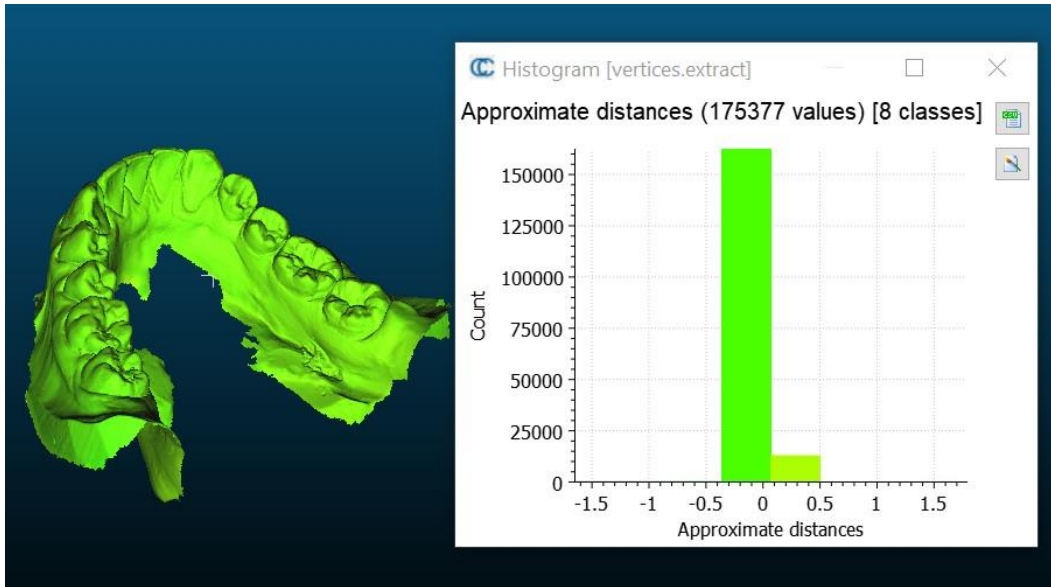

Fig 19: T09 lower jaw .

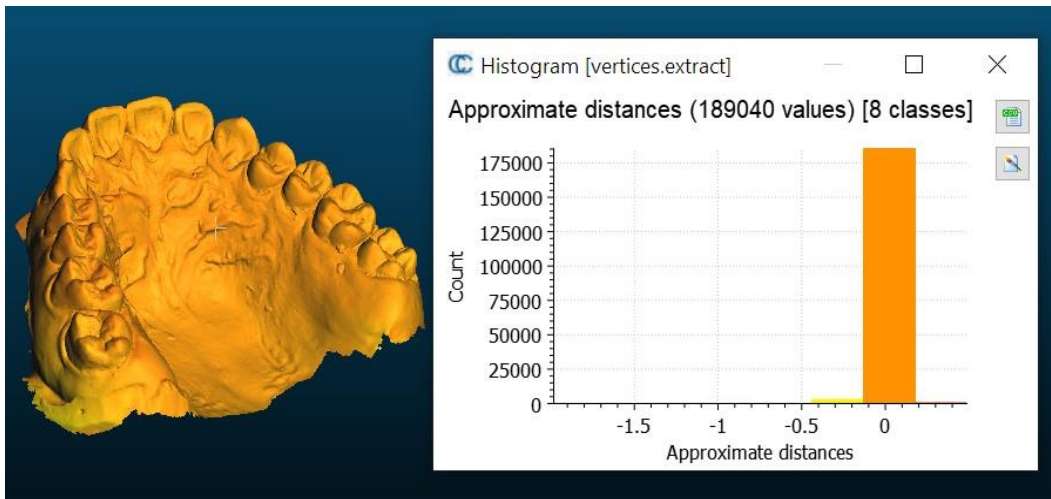

Fig 20: T09 upper jaw .

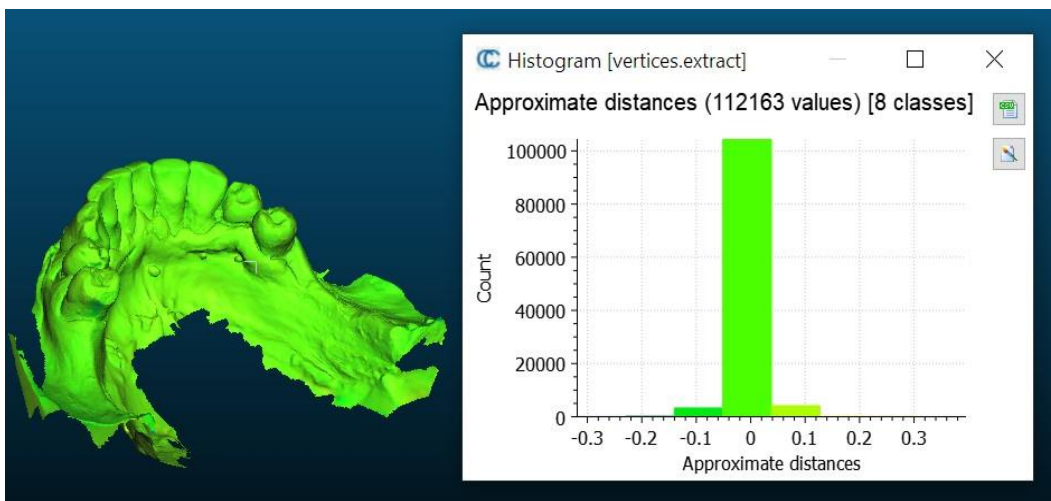

F21: T10 lower jaw .

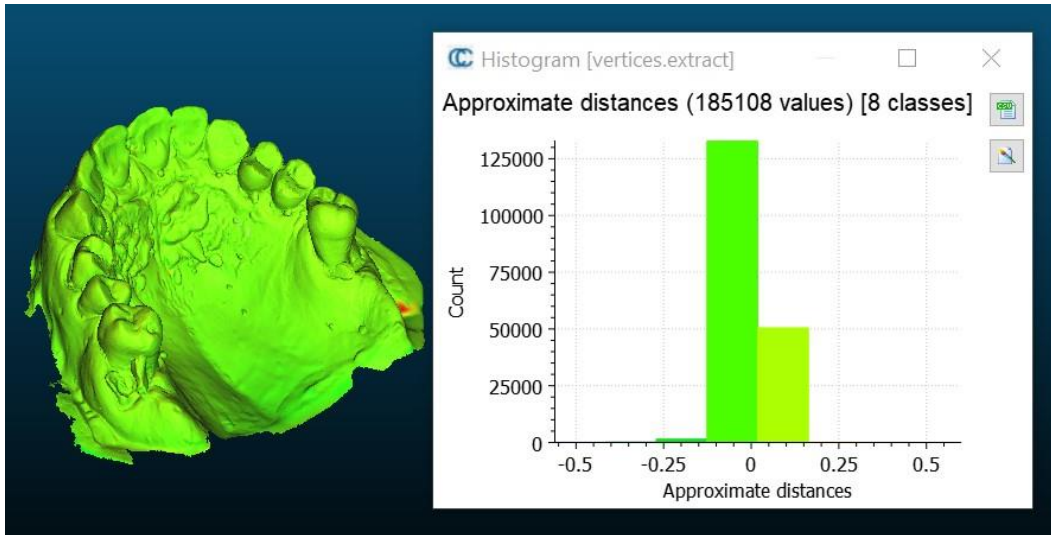

F22: T10 upper jaw .

# IOS2 + OP1

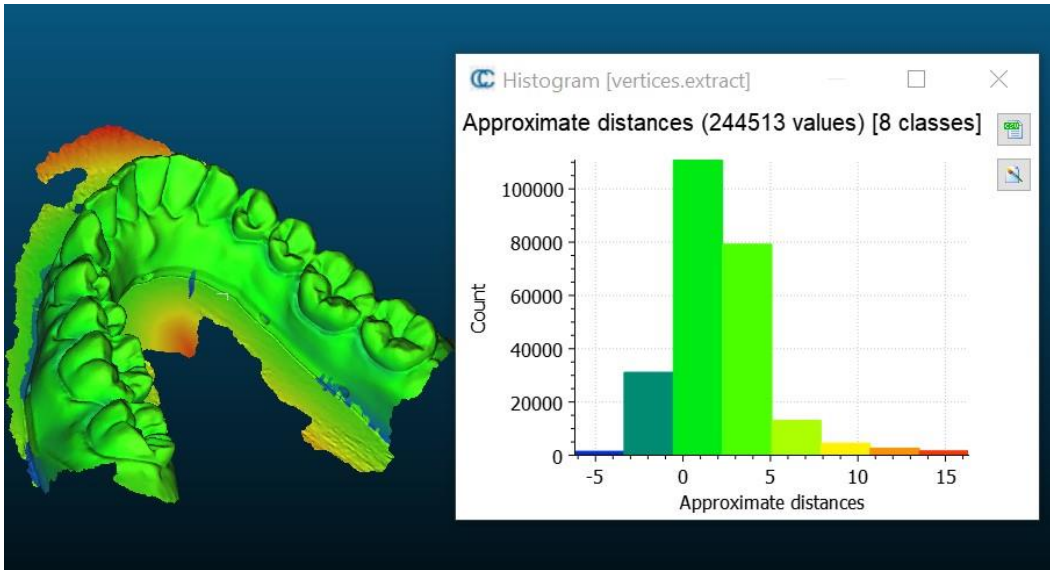

Fig 1: J standard model lower jaw .

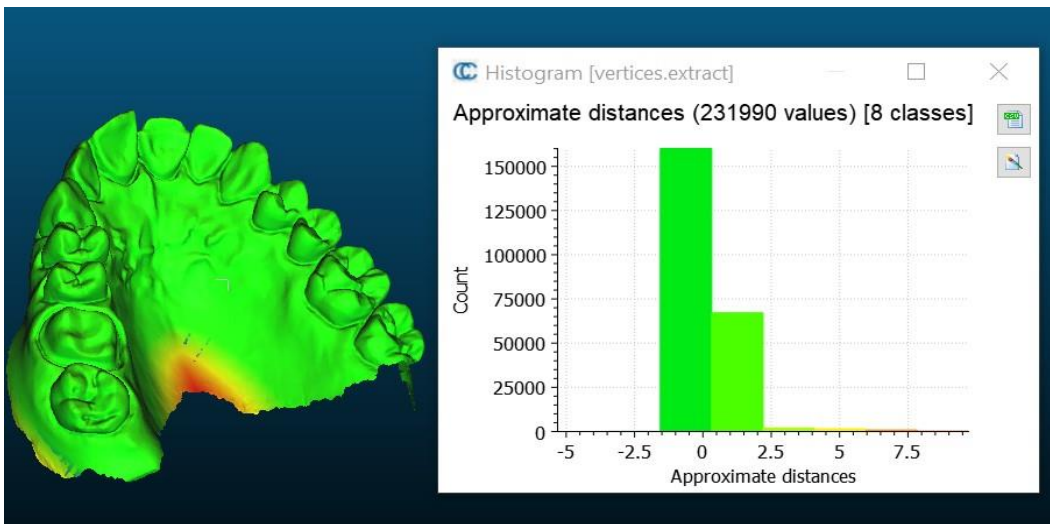

Fig 2: J standard model upper jaw .

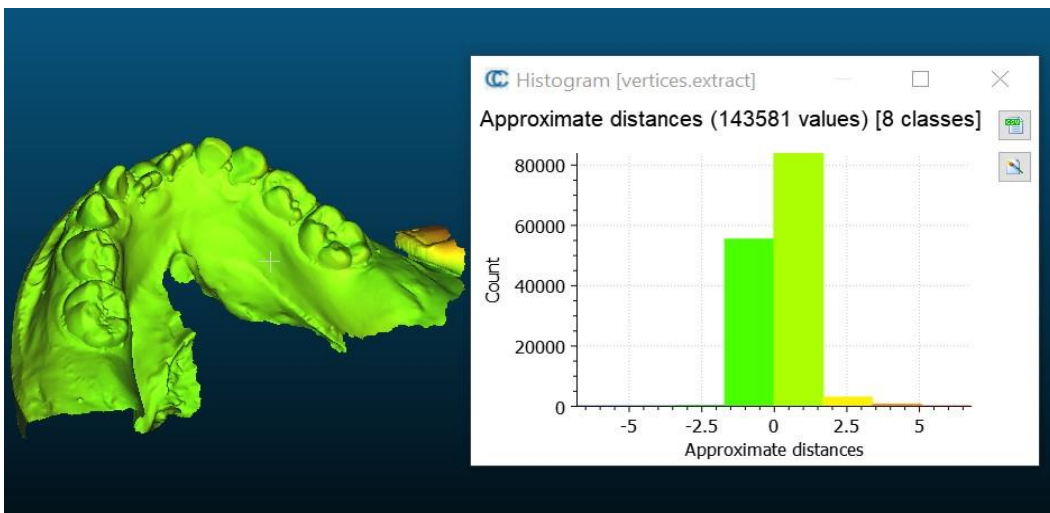



Fig 3: J01 lower jaw .

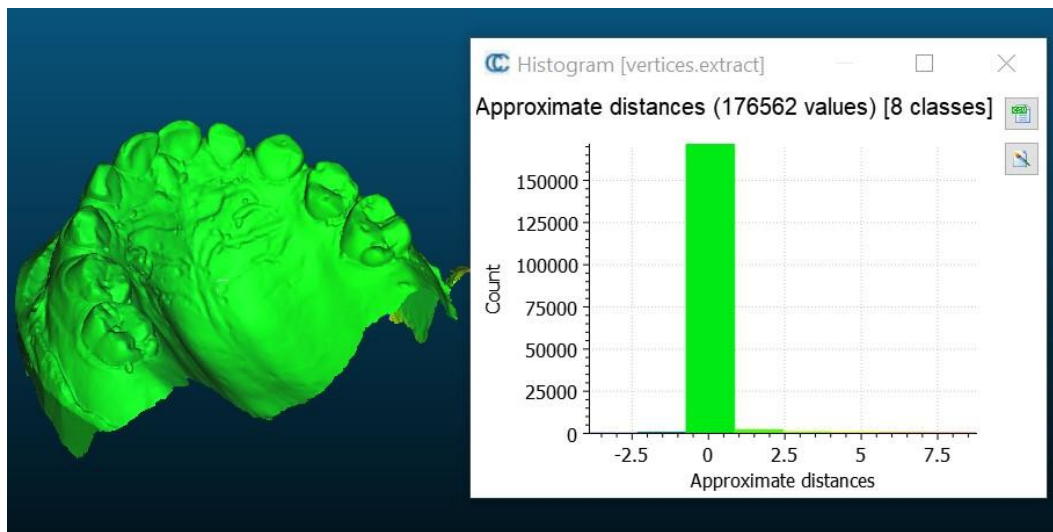

Fig 4: J01 upper jaw .

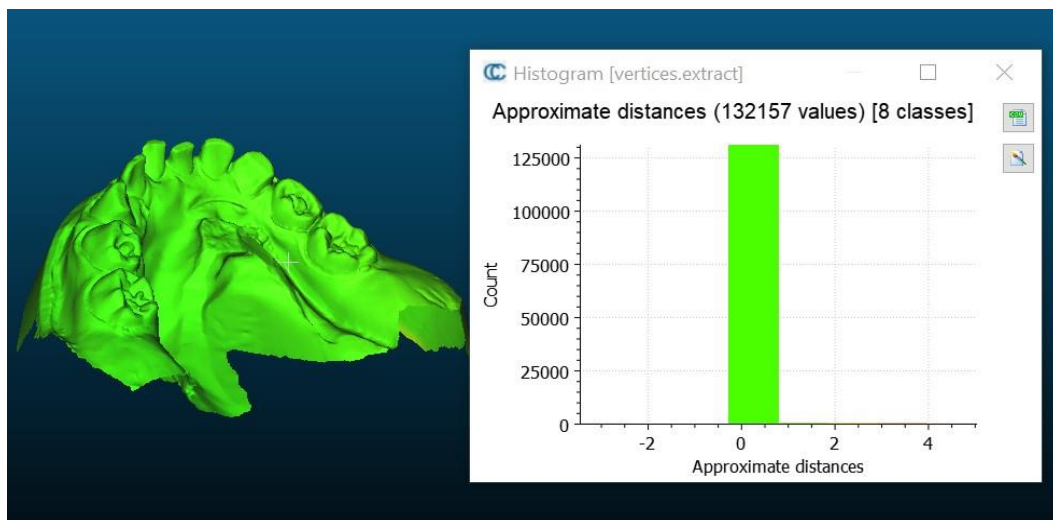

Fig 5: J02 lower jaw .

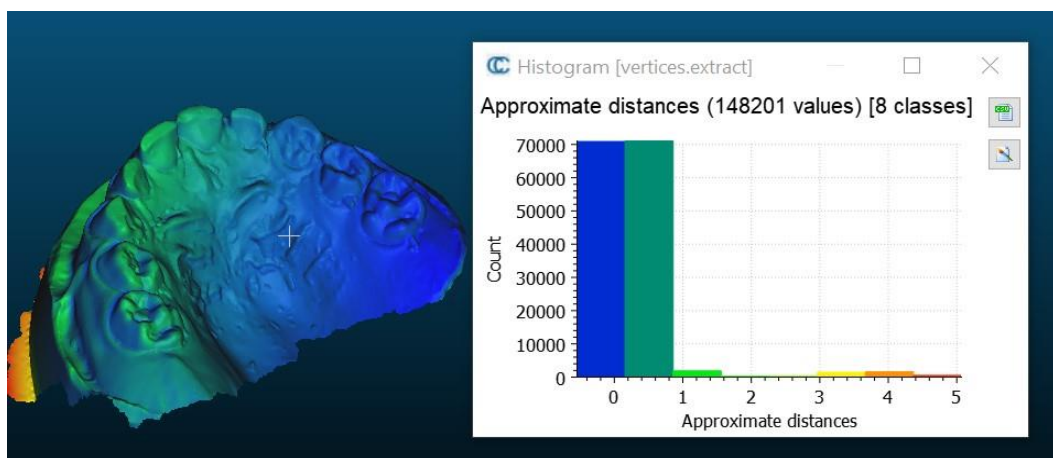

Fig 6: J02 upper jaw .

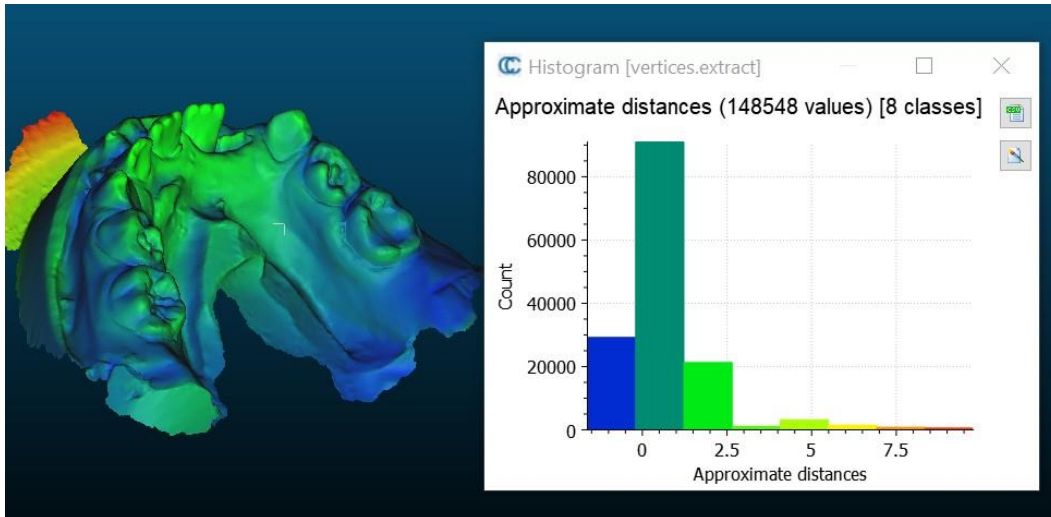

Fig 7: J03 lower jaw .

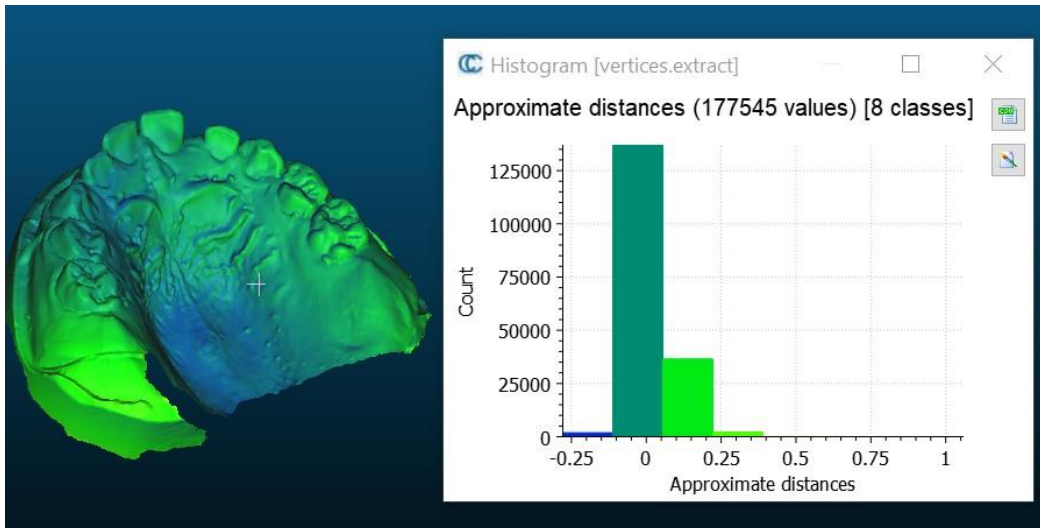

Fig 8: J03 upper jaw .

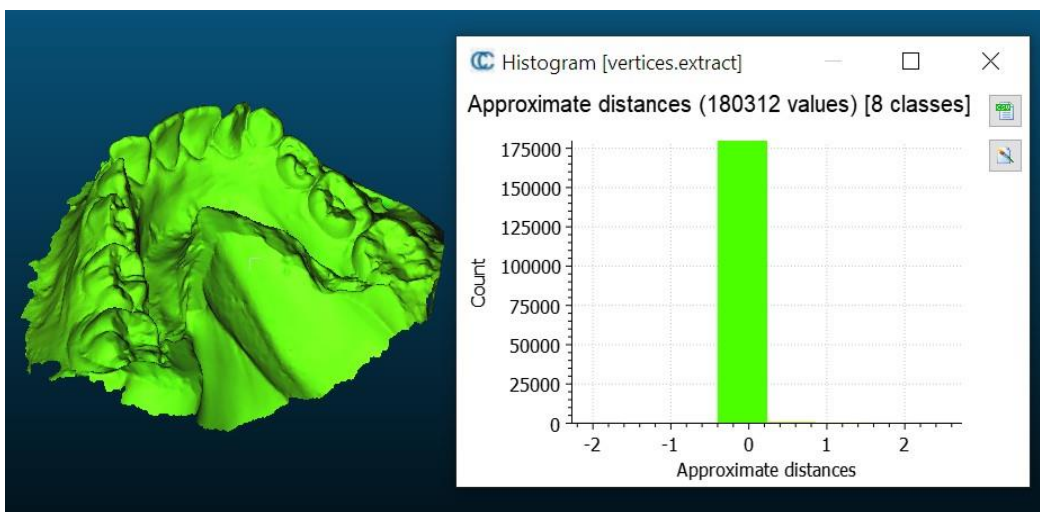

Fig 9: J04 lower jaw .

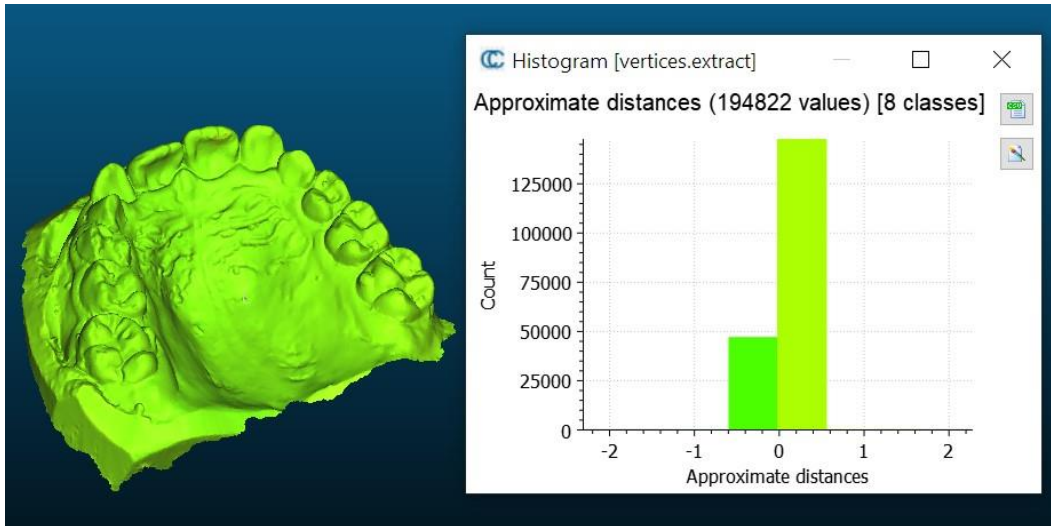

Fig 10: J04 upper jaw .

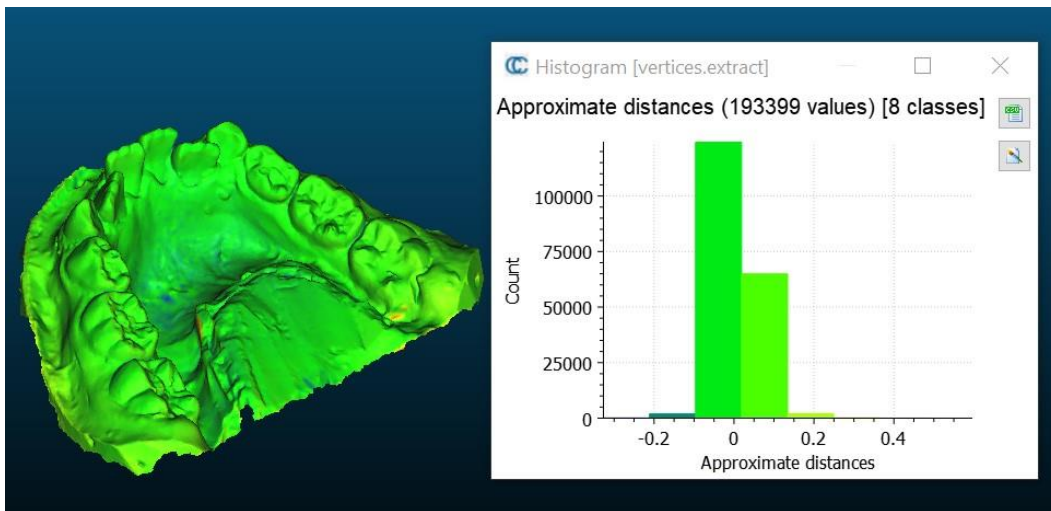

Fig 11: J05 lower jaw .

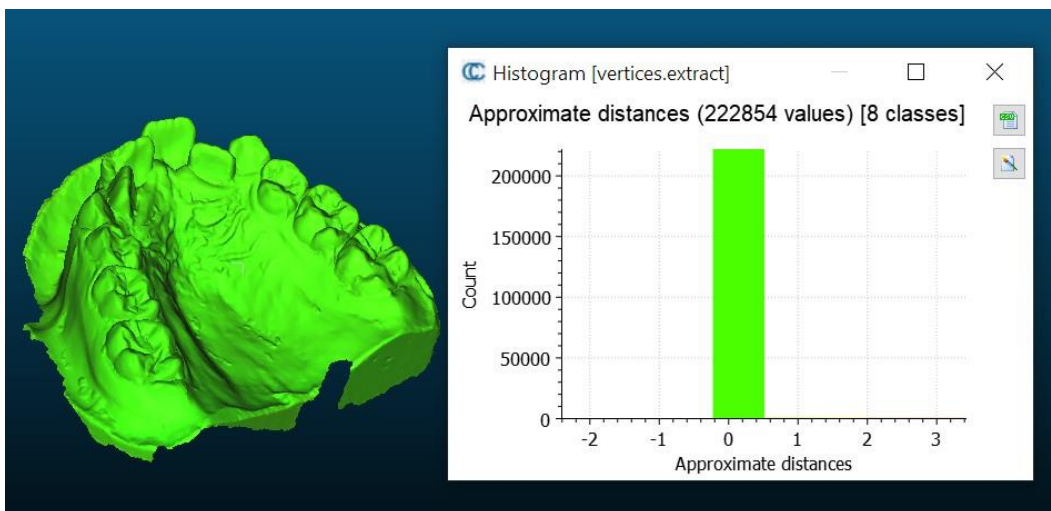

Fig 12: J05 upper jaw .

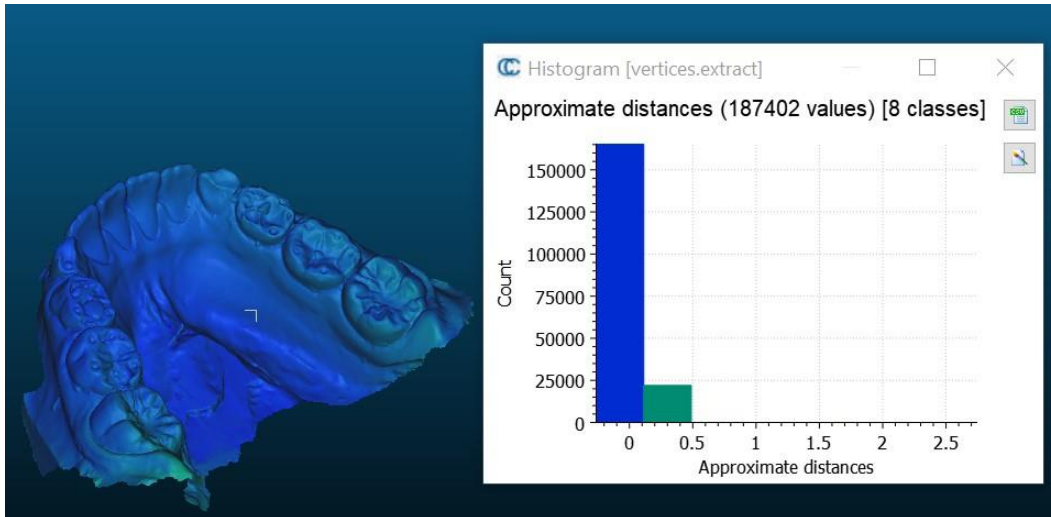

Fig 13: J06 lower jaw .

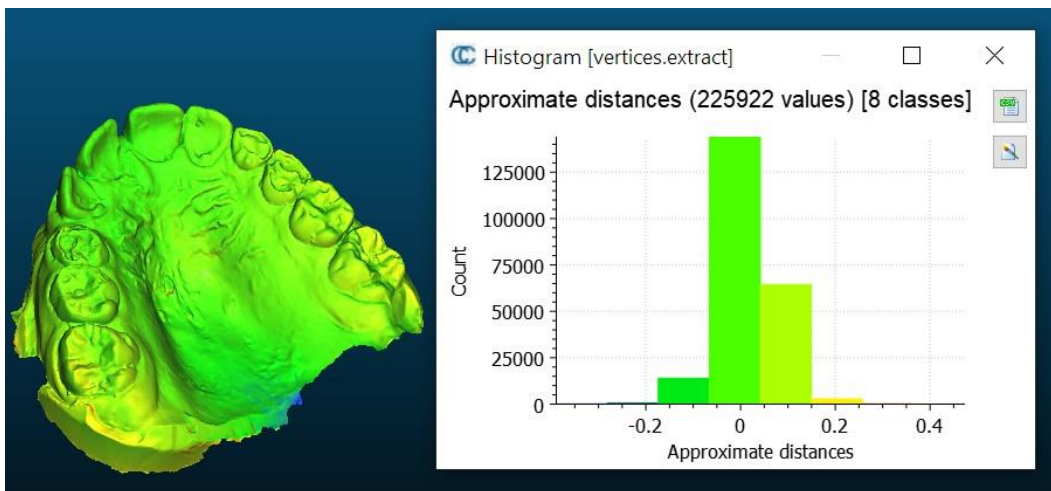

Fig 14: J06 upper jaw .

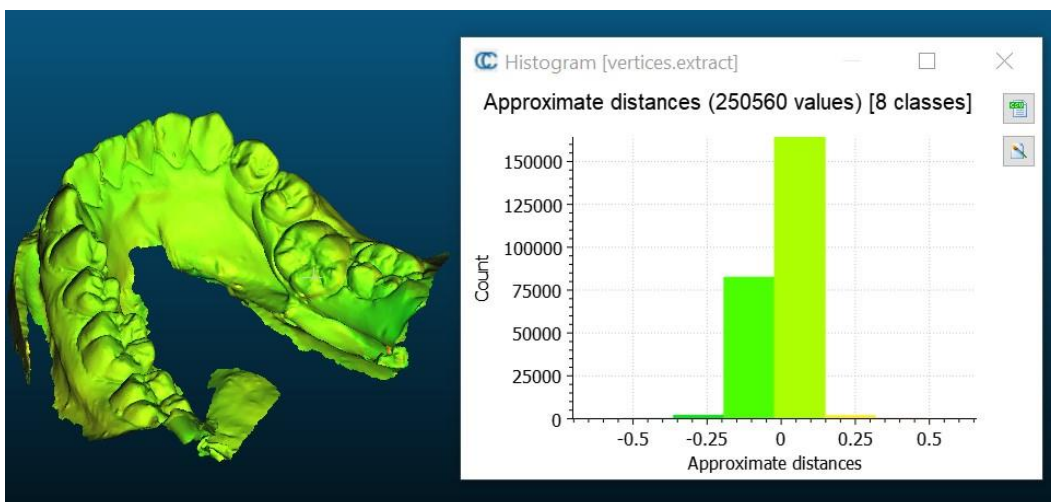

Fig 15: J07 lower jaw .



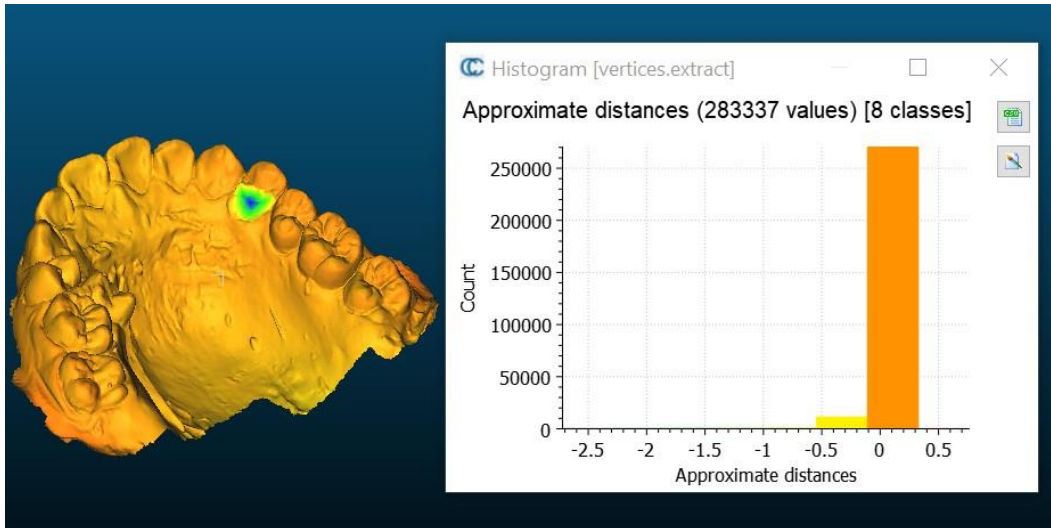

Fig 16: J07 upper jaw .

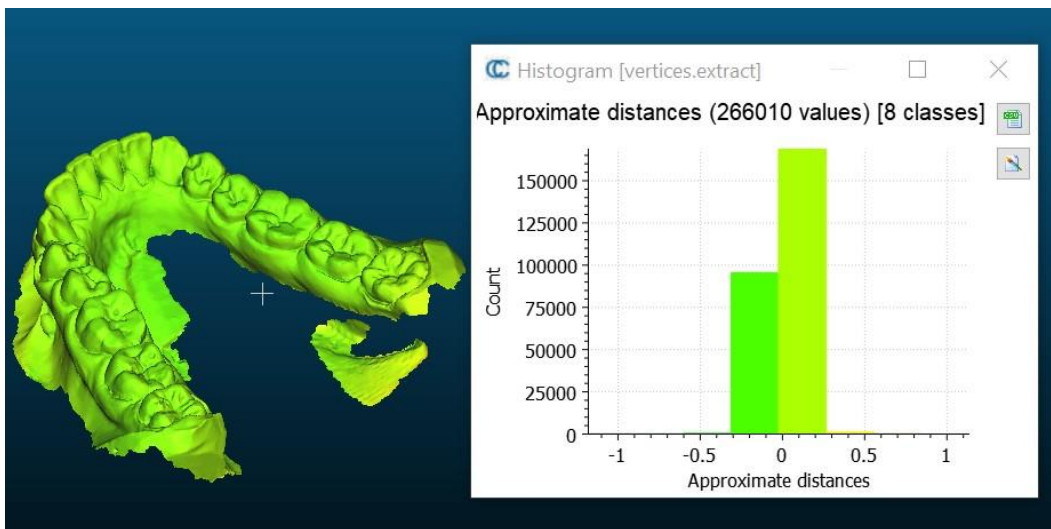

Fig 17: J08 lower jaw .

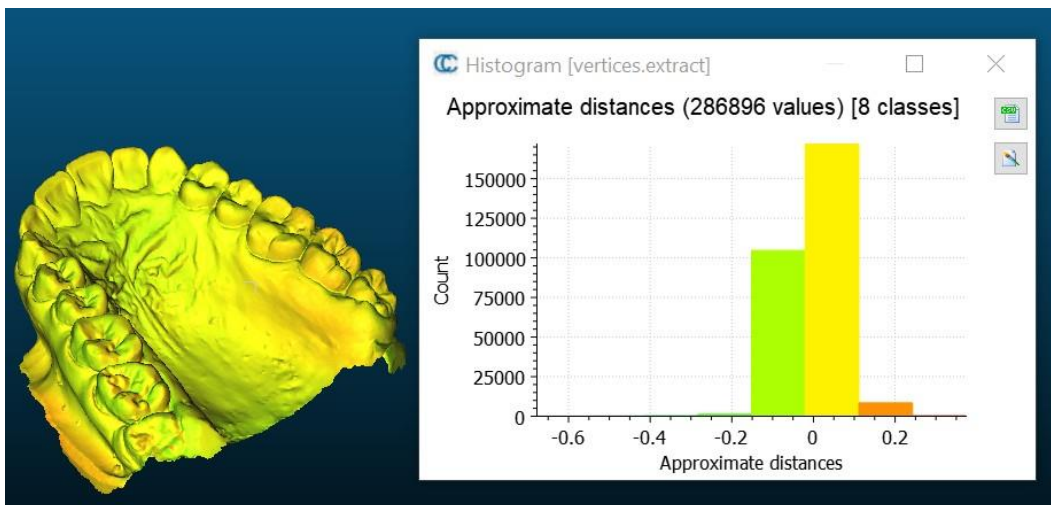

Fig 18: J08 upper jaw .

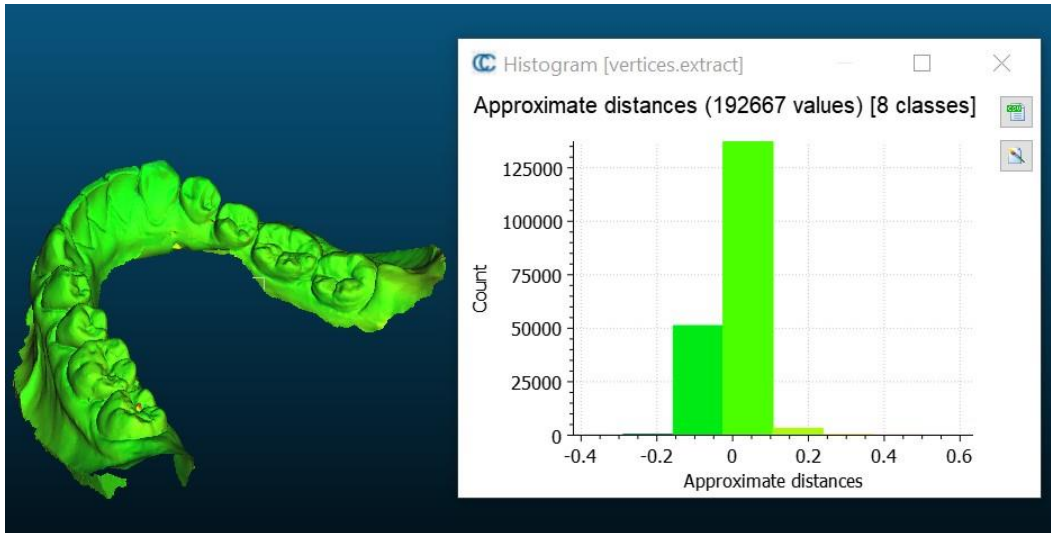

Fig 19: J09 lower jaw .

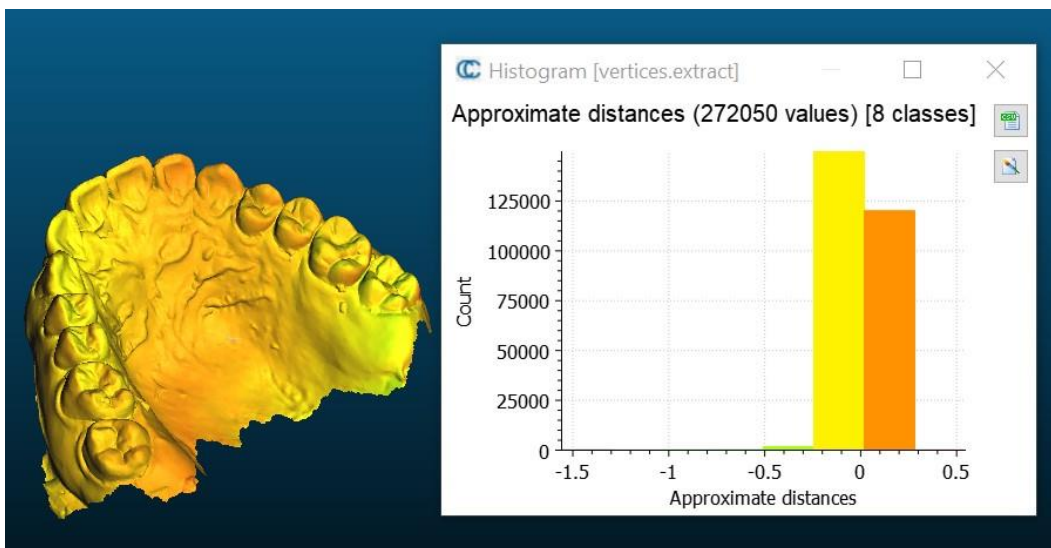

Fig 20: J09 upper jaw .

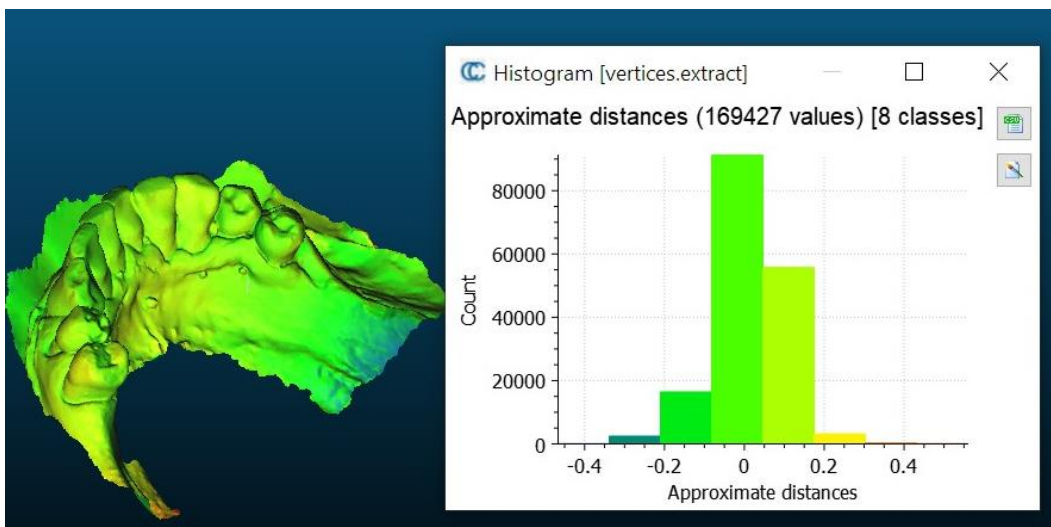

Fig 21: J10 lower jaw .

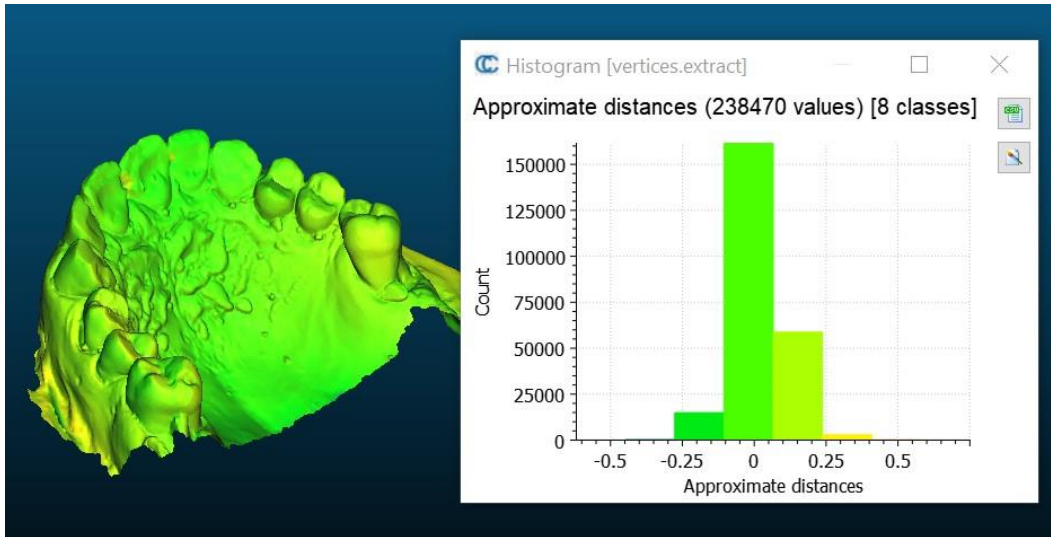

Fig 22: J10 upper jaw .

### IOS2 + OP2

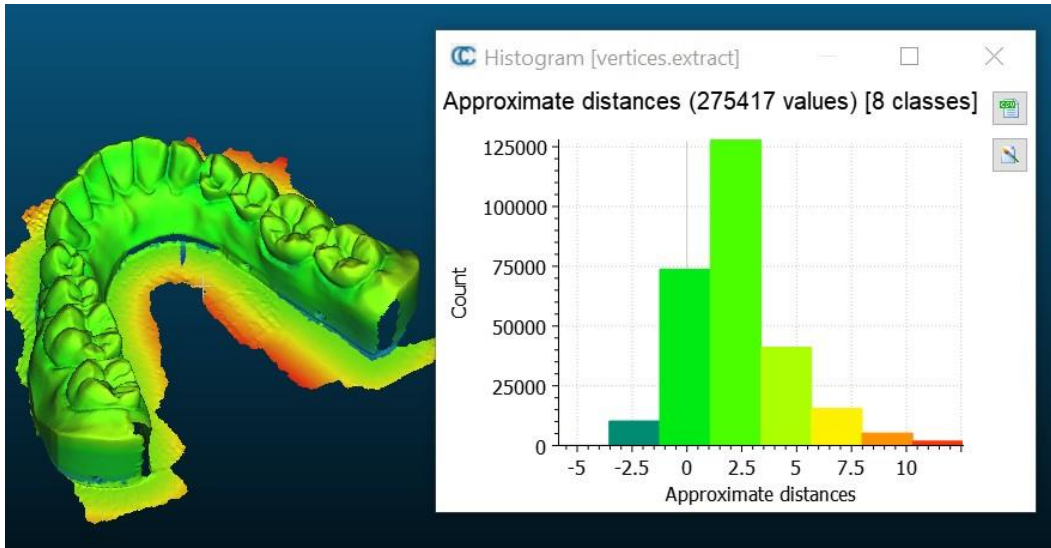

Fig 1: T standard model lower jaw .

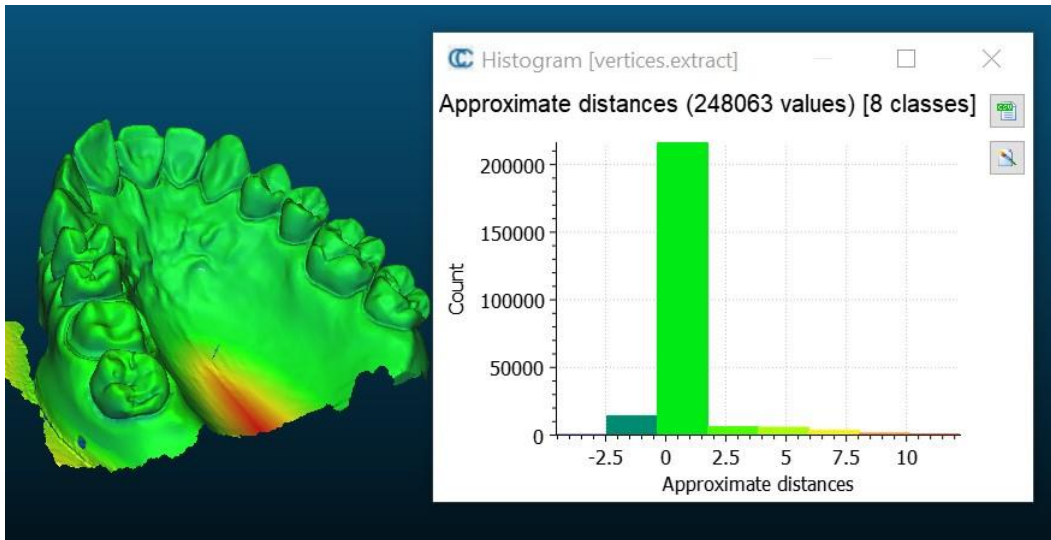

Fig 2: T standard model upper jaw .

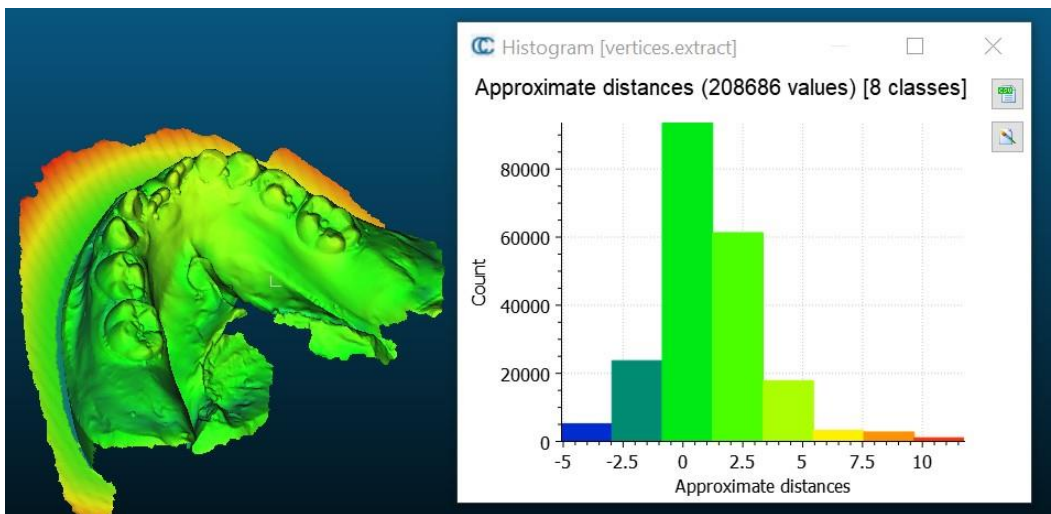

Fig 3: T01 lower jaw .



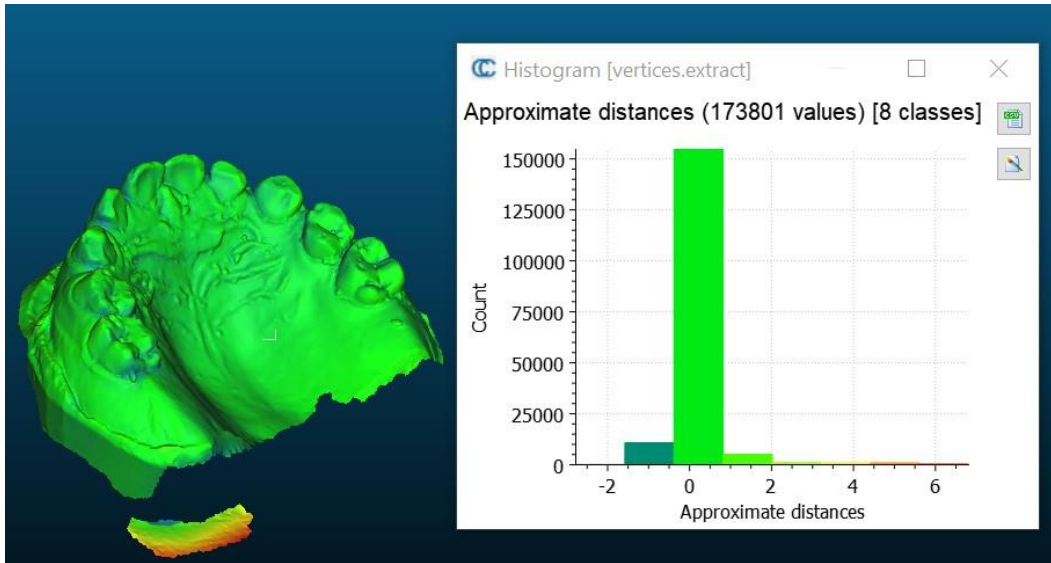

Fig 4: T01 upper jaw .

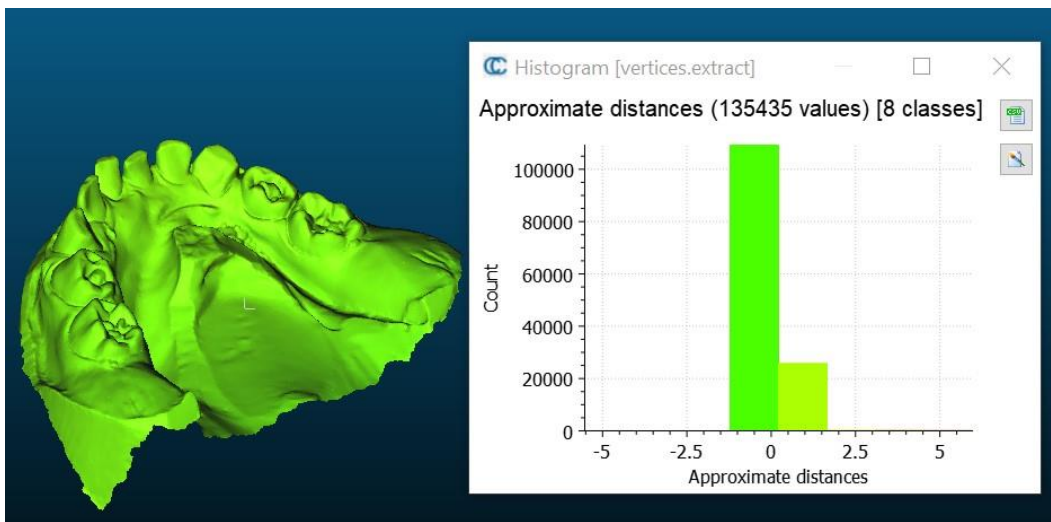

Fig 5: T02 lower jaw .

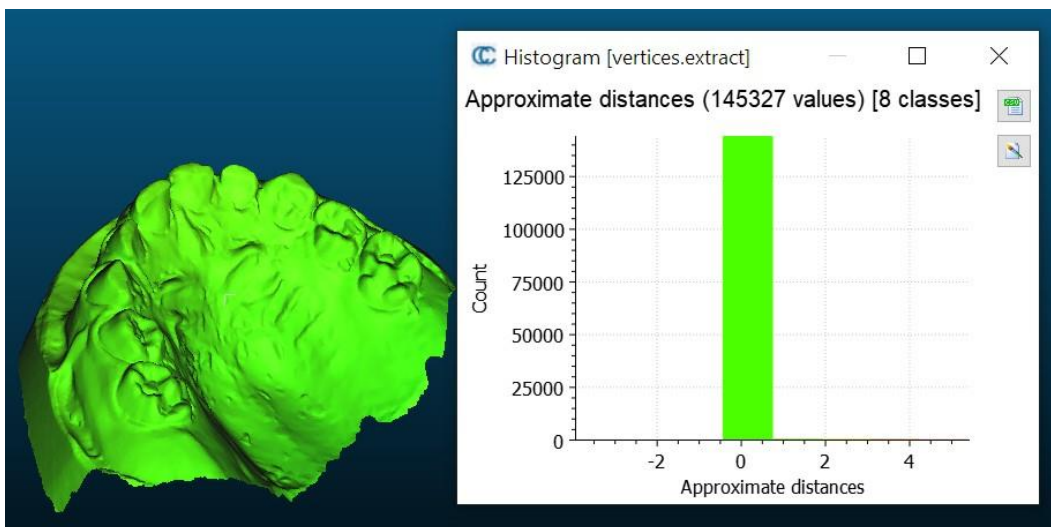

Fig 6: T02 upper jaw .

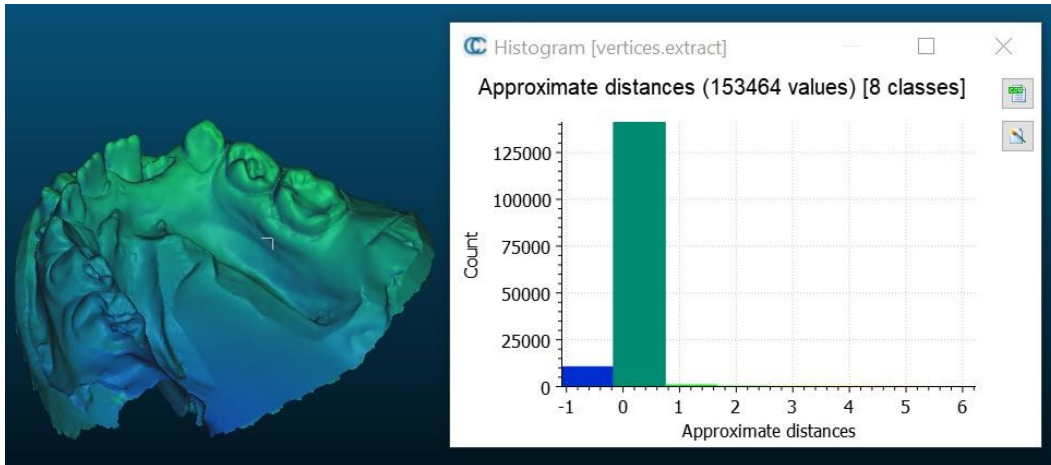

Fig 7: T03 lower jaw .

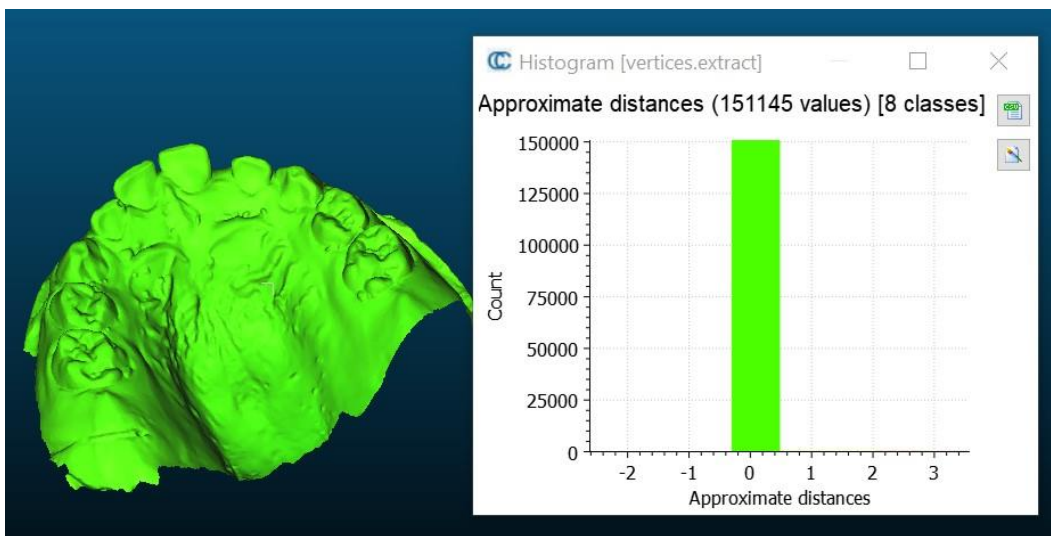

Fig 8: T03 upper jaw .

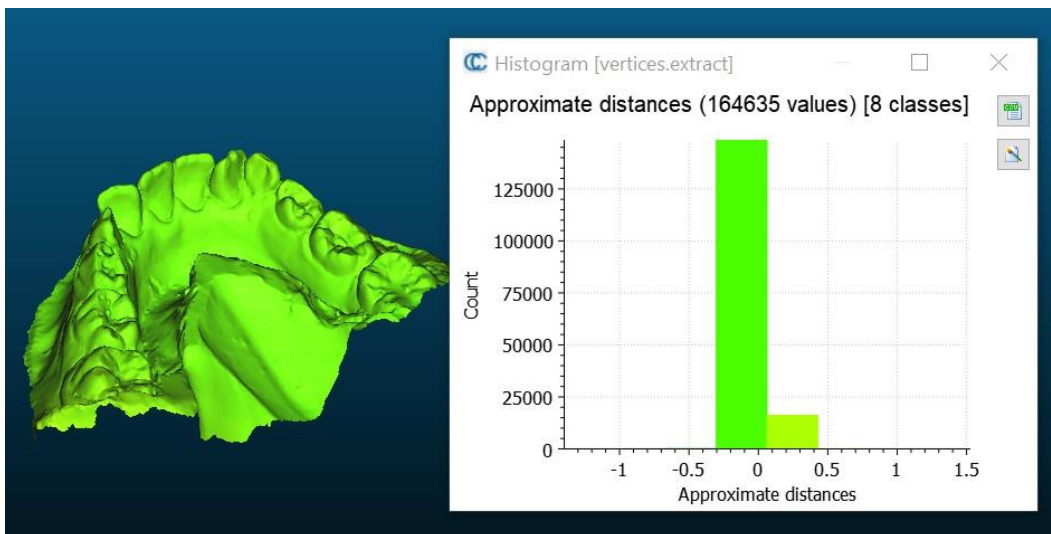

Fig 9: T04 lower jaw .

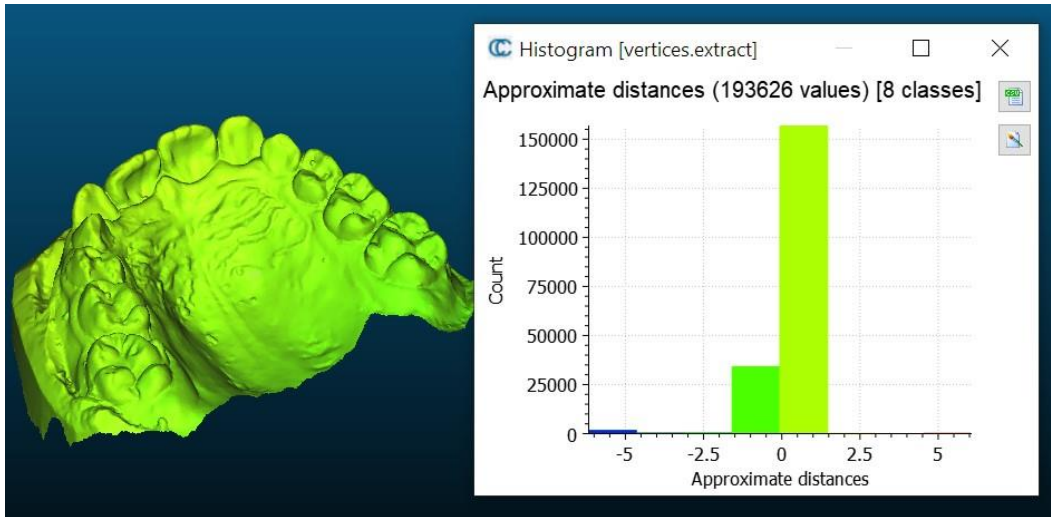

Fig 10: T04 upper jaw .

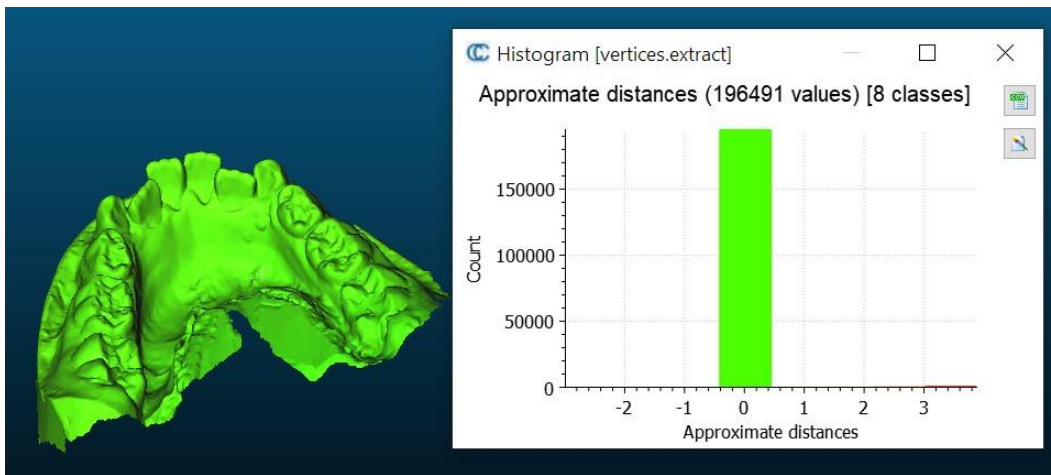

Fig 11: T05 lower jaw .

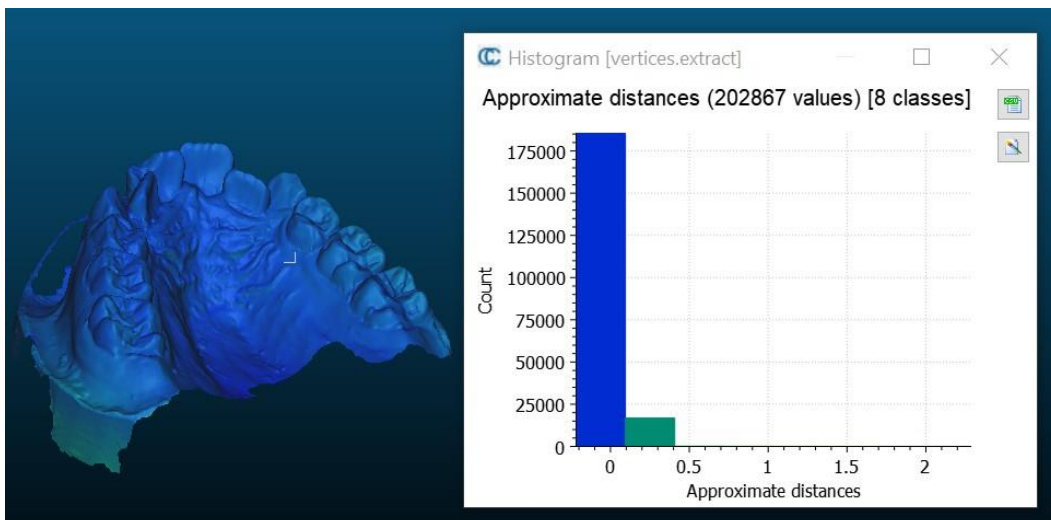

Fig 12: T05 upper jaw .

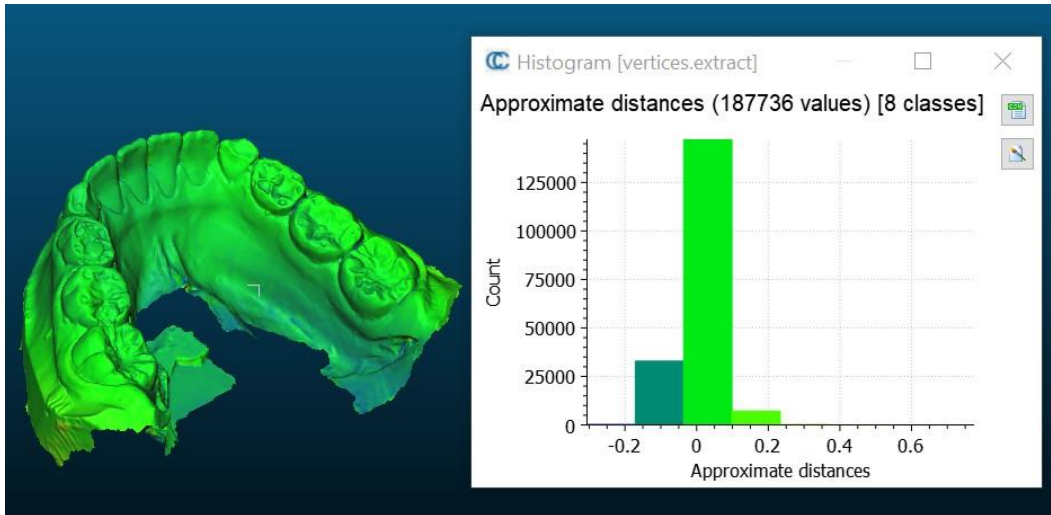

Fig 13: T06 lower jaw .

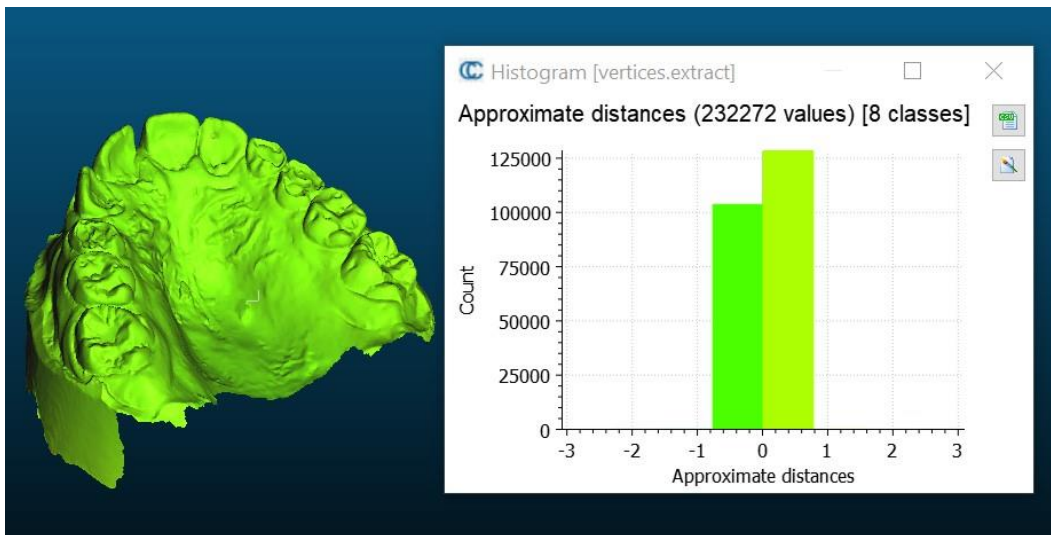

Fig 14: T06 upper jaw .

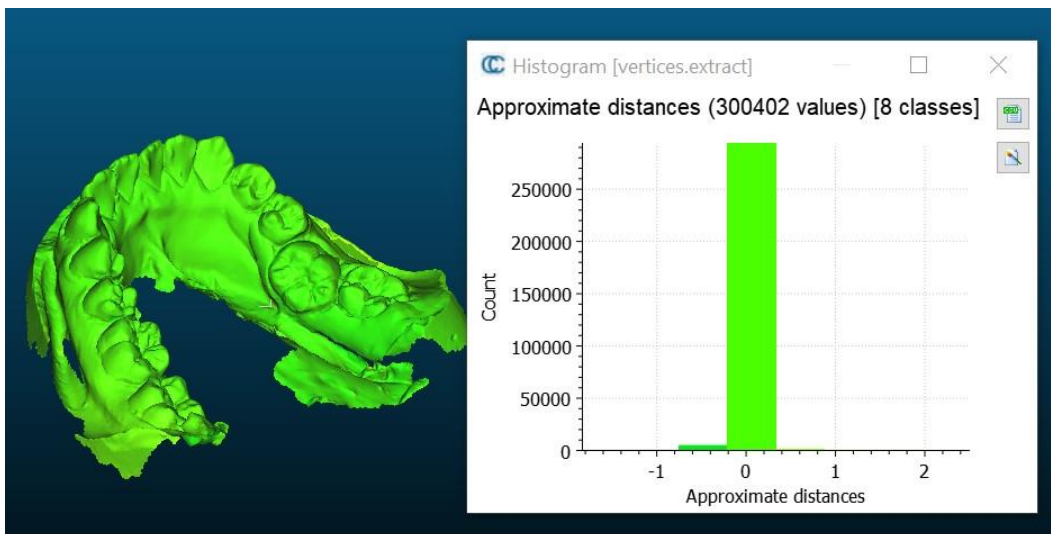

Fig 15: T07 lower Jaw .



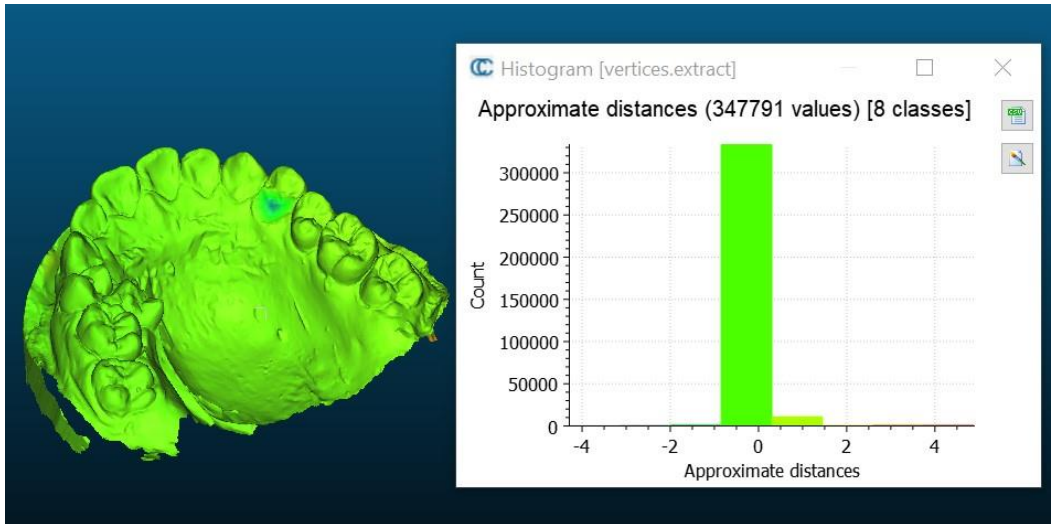

Fig 16: T07 upper Jaw .

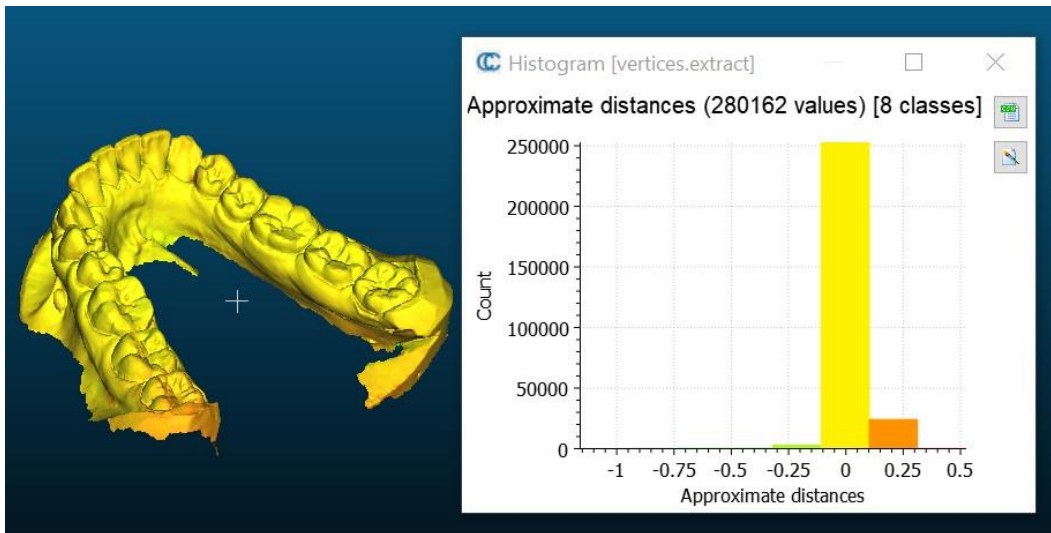

Fig 17: T08 lower jaw .

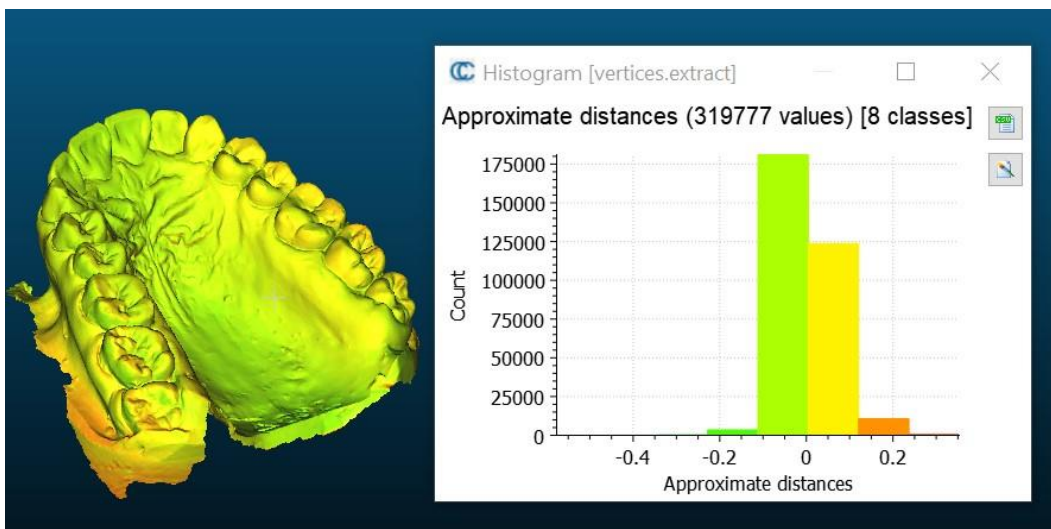

Fig 18: T08 upper Jaw .

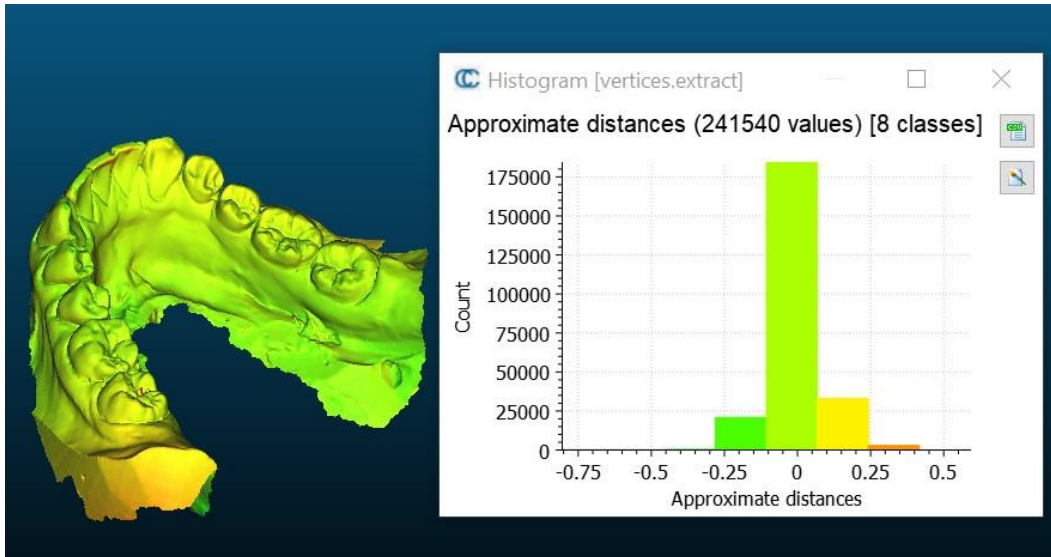

Fig 19: T09 lower Jaw .

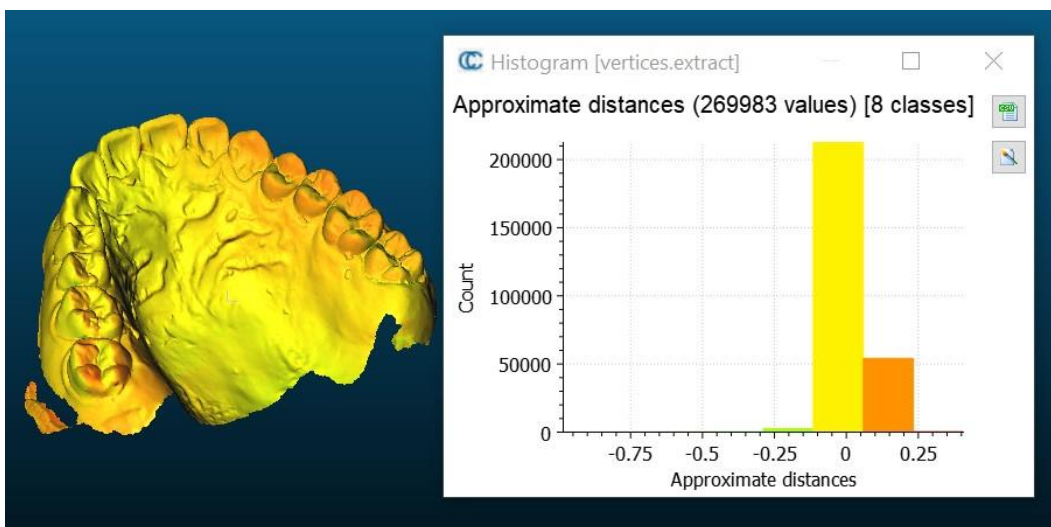

Fig 20: T09 upper jaw .

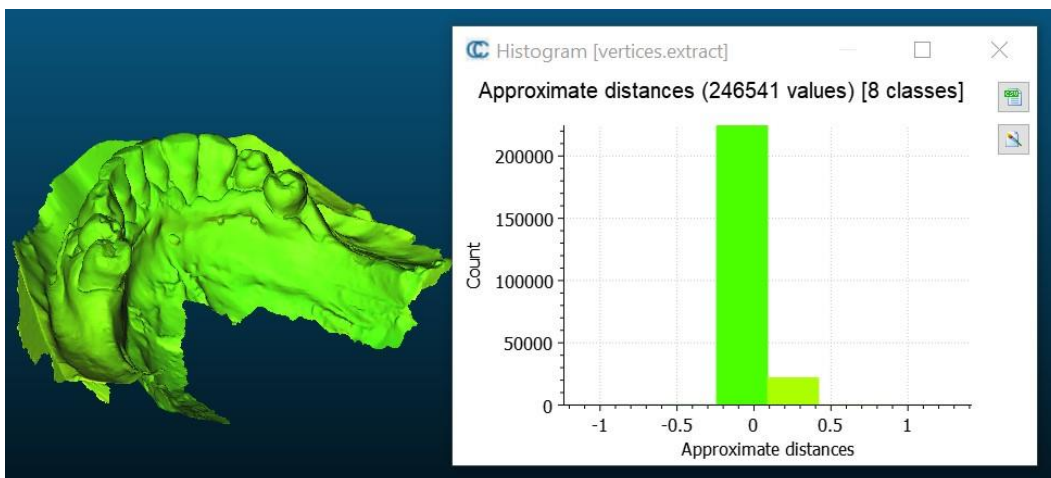

Fig 21: T10 lower jaw .

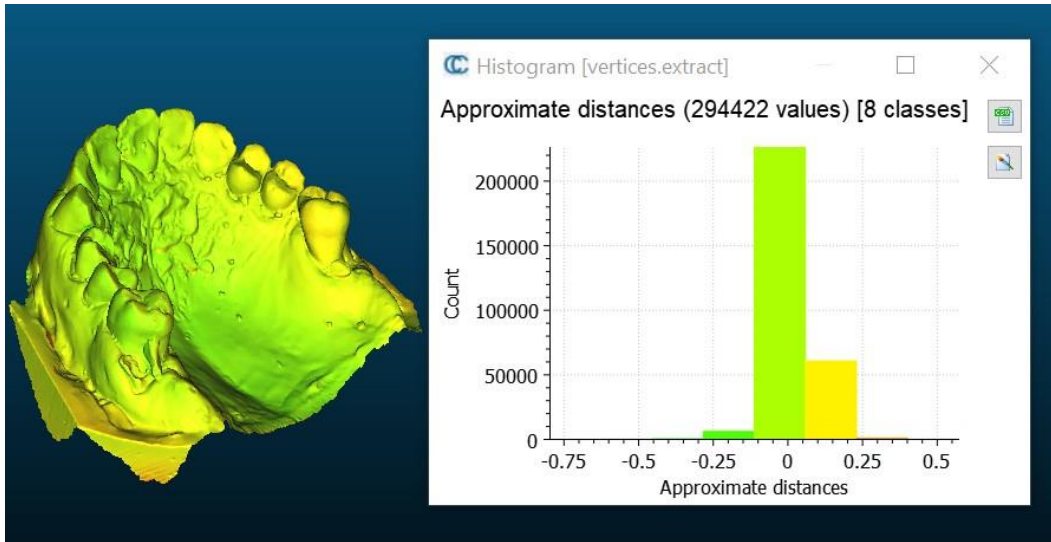

Fig 22: T10 upper jaw .

Heatmaps of Augmented scans generated through Hausdorff's distance evaluation

IOS1 + OP1

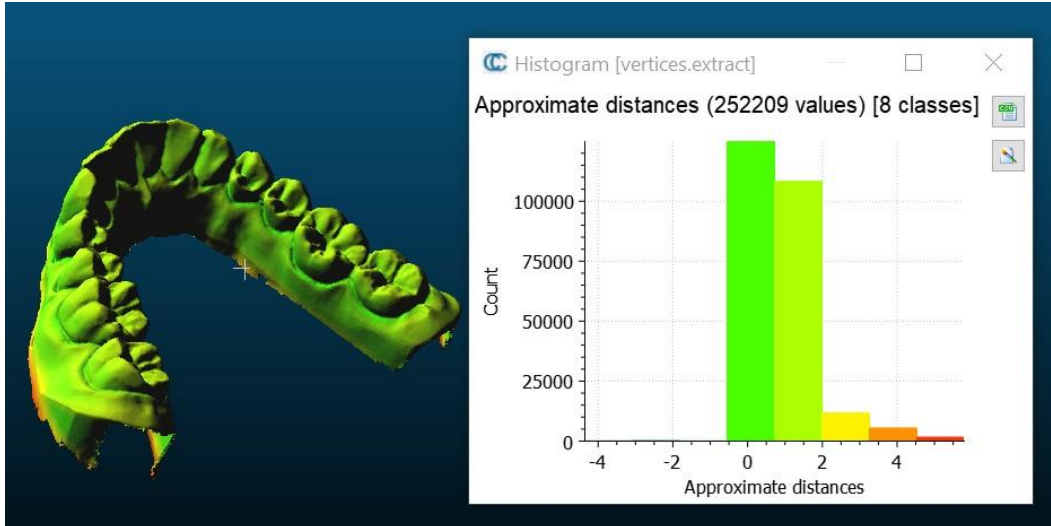

Fig 1: J standard model lower jaw .

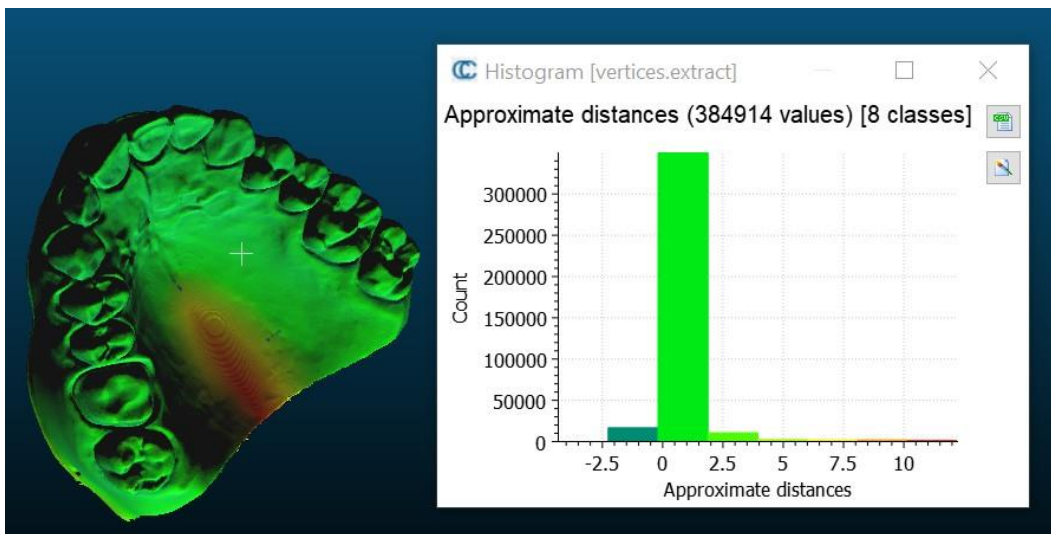

Fig 2: J standard model upper jaw .

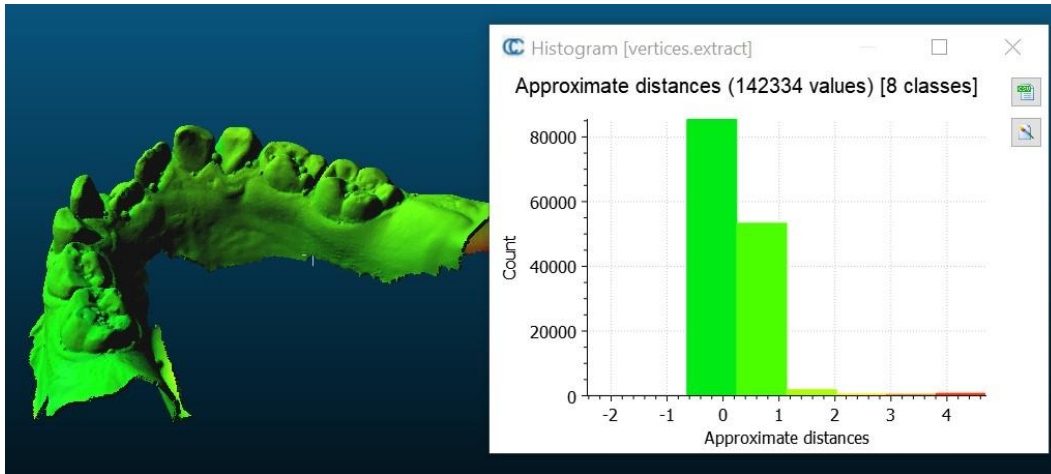

Fig 3: J01 lower jaw .

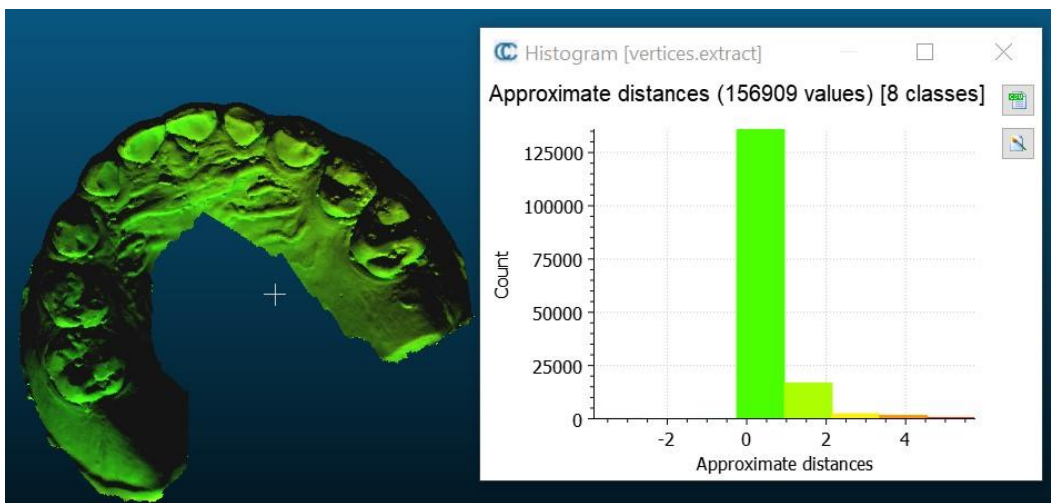

Fig 4: J01 upper jaw .

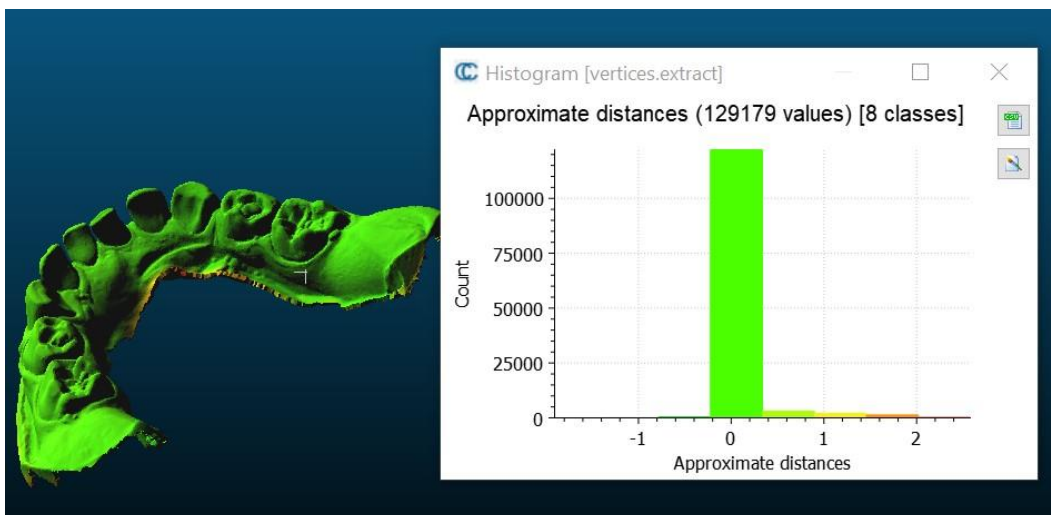

Fig 5: J02 lower jaw .



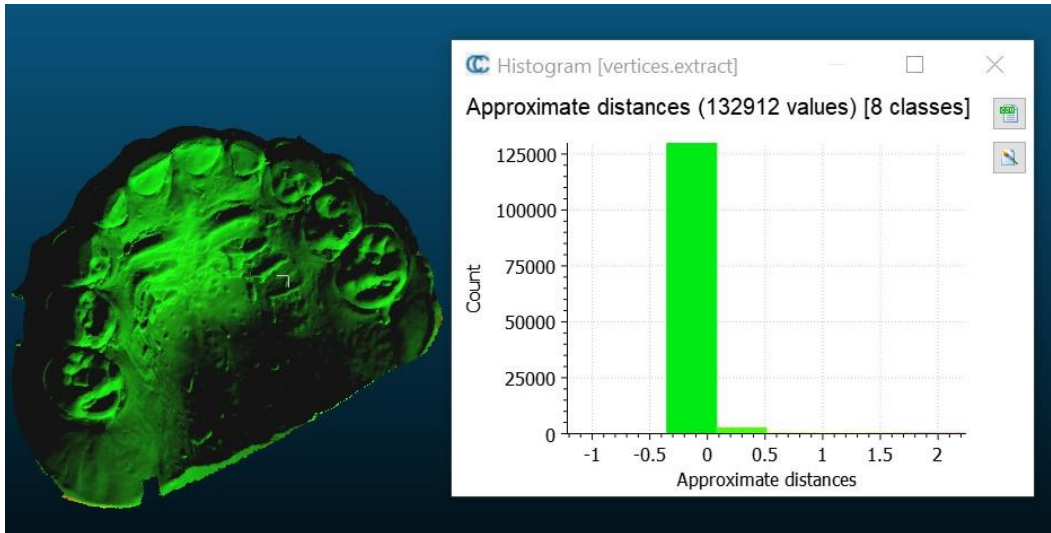

Fig 6: J02 upper jaw .

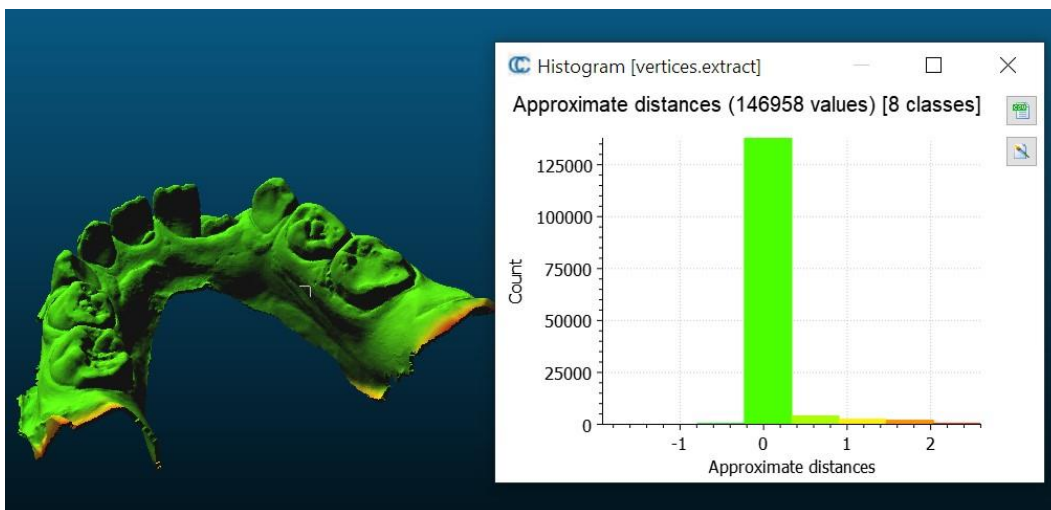

Fig 7: J03 lower jaw .

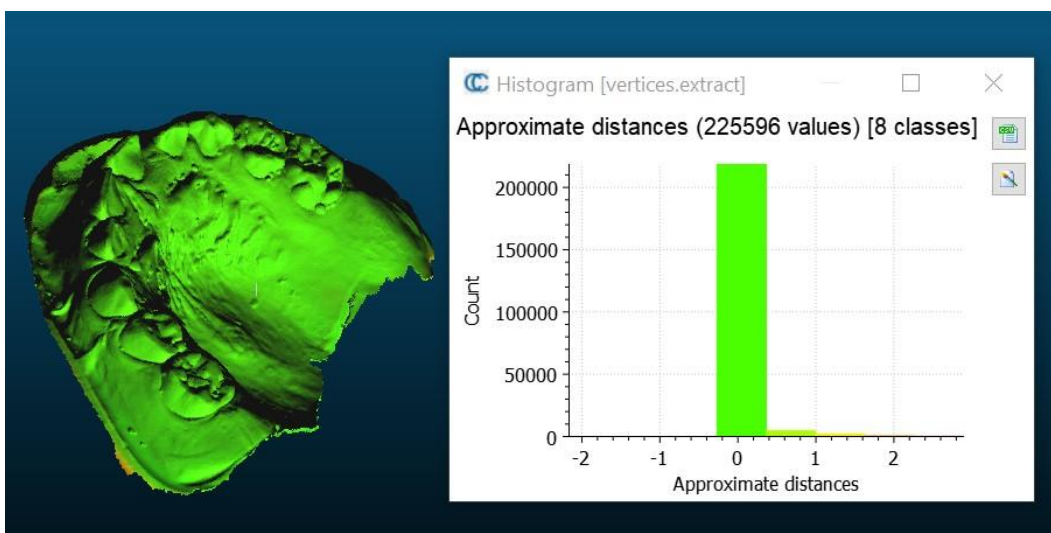

Fig 8: J03 upper jaw .

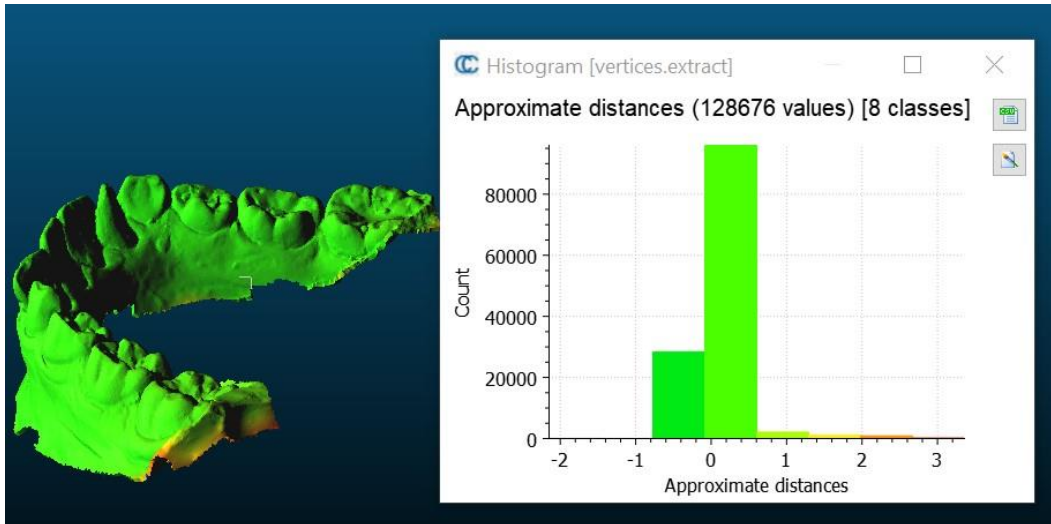

Fig 9: J04 lower jaw .

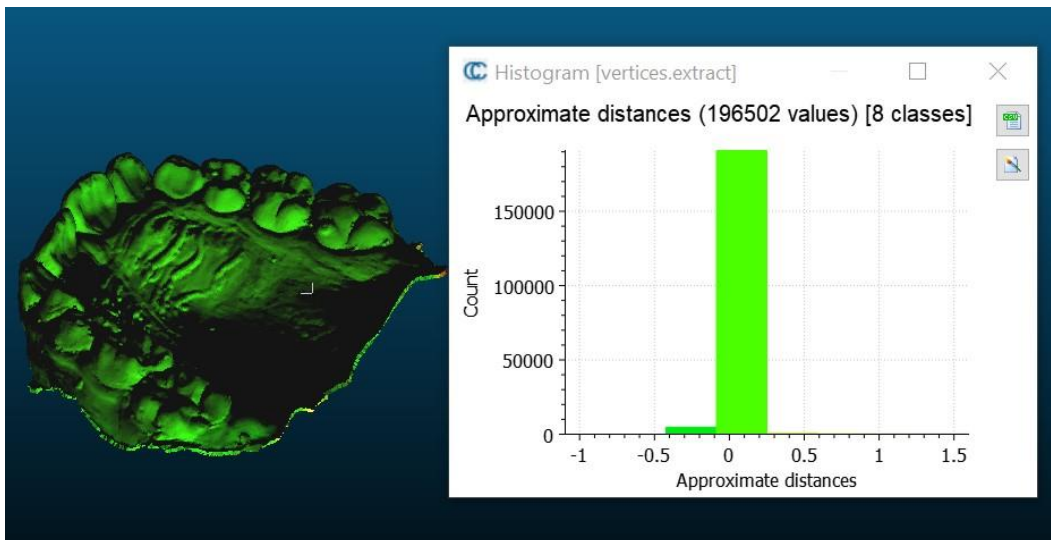

Fig 10: J04 upper jaw .

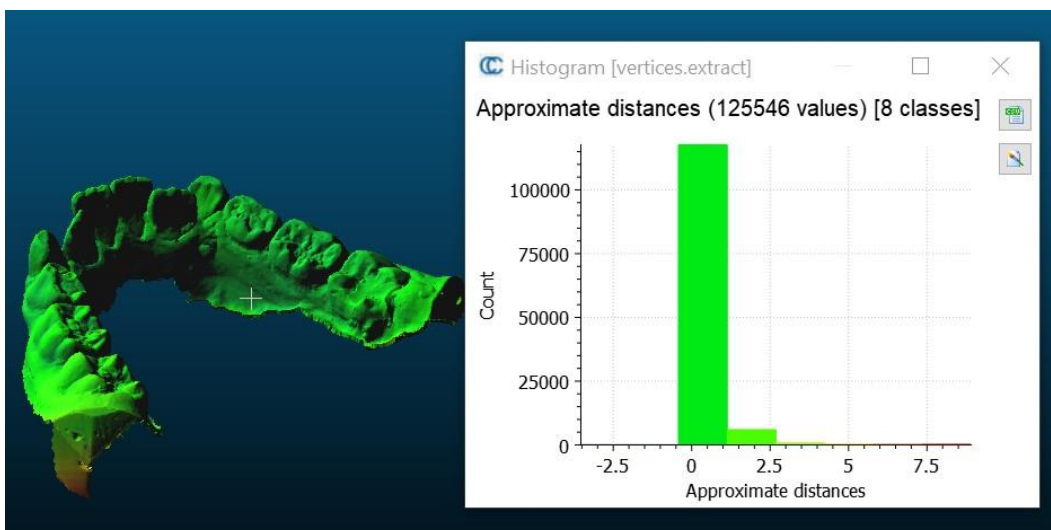

Fig 11: J05 lower jaw .

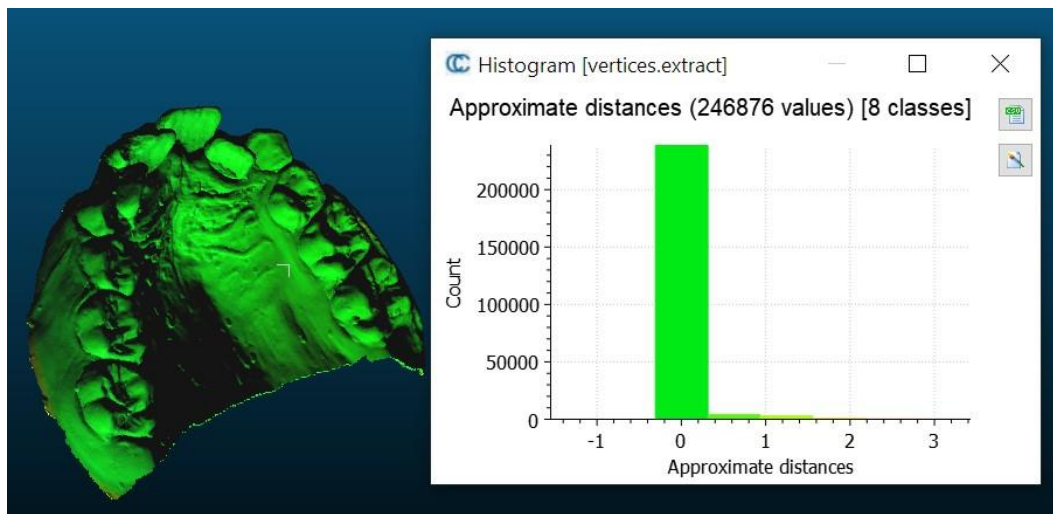

Fig 12: J05 upper jaw .

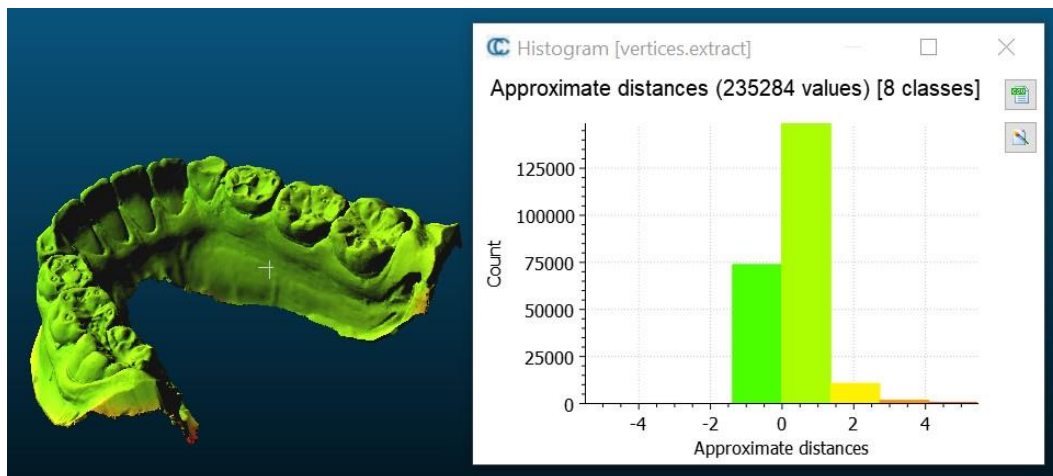

Fig 13: J06 lower jaw .

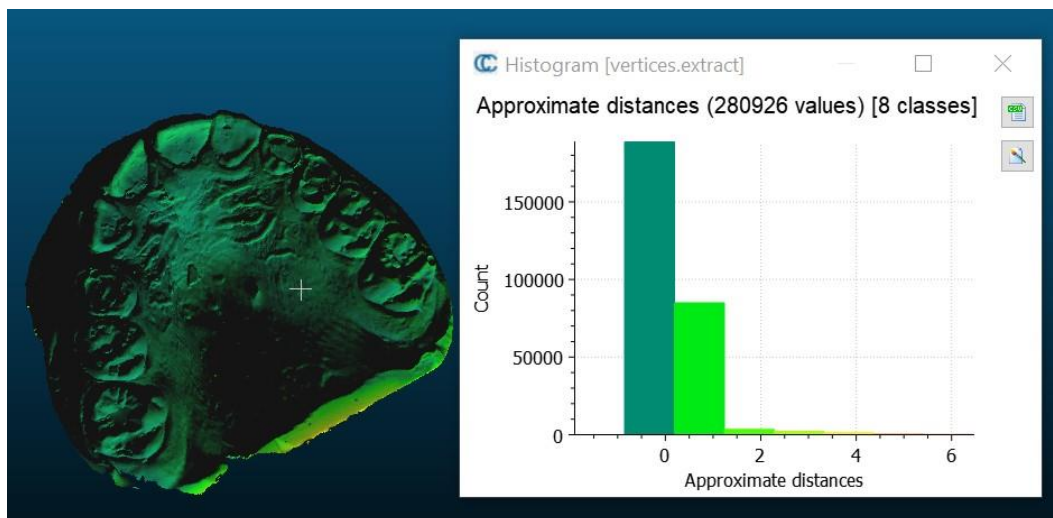

Fig 14: J06 upper jaw .



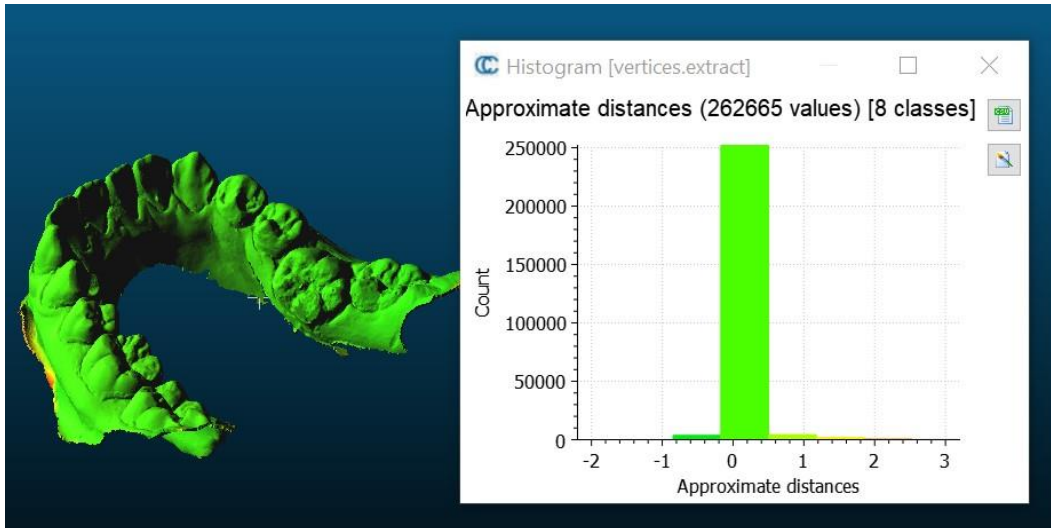

Fig 15: J07 lower jaw .

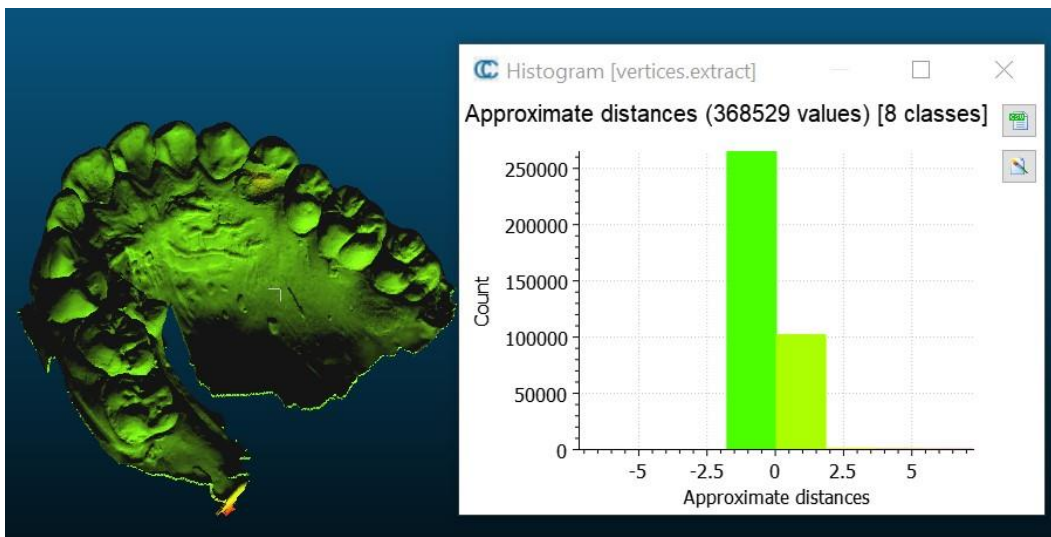

Fig 16: J07 upper jaw .

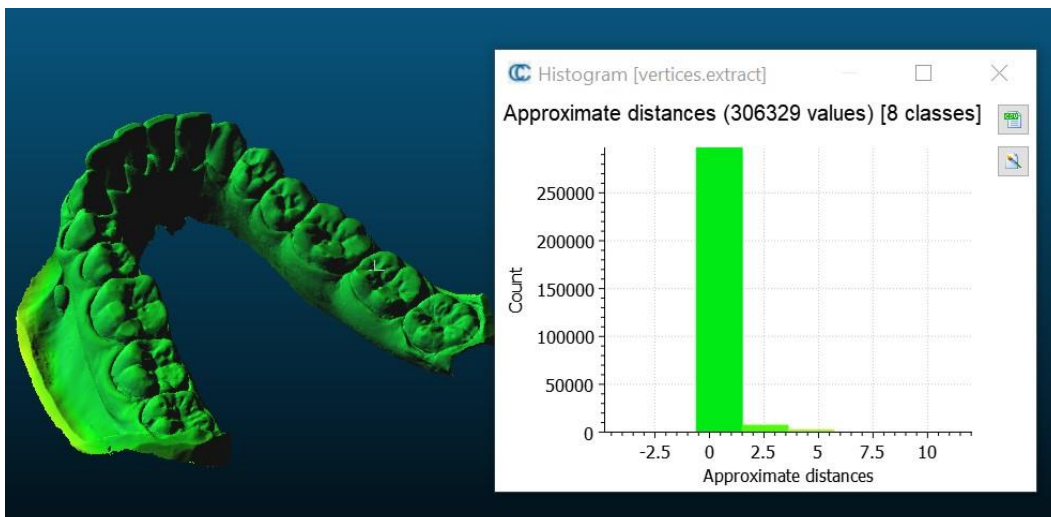

Fig 17: J08 lower jaw .

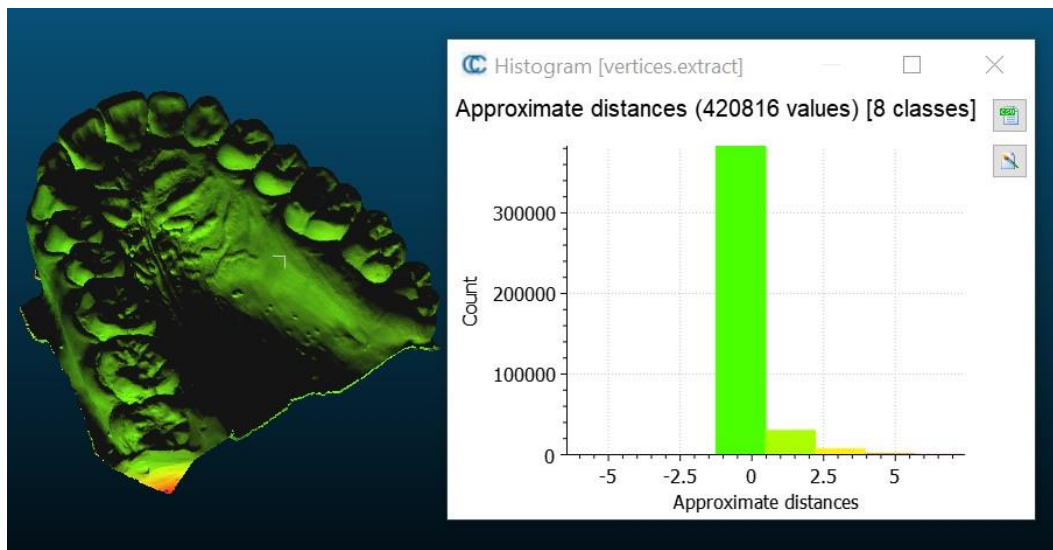

Fig 18: J08 upper jaw .

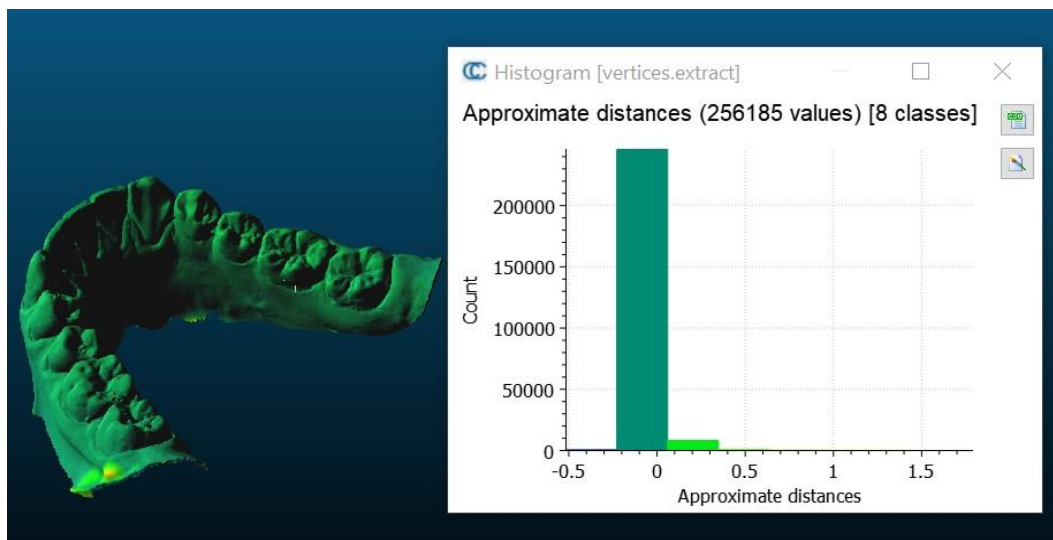

Fig 19: J09 lower jaw .

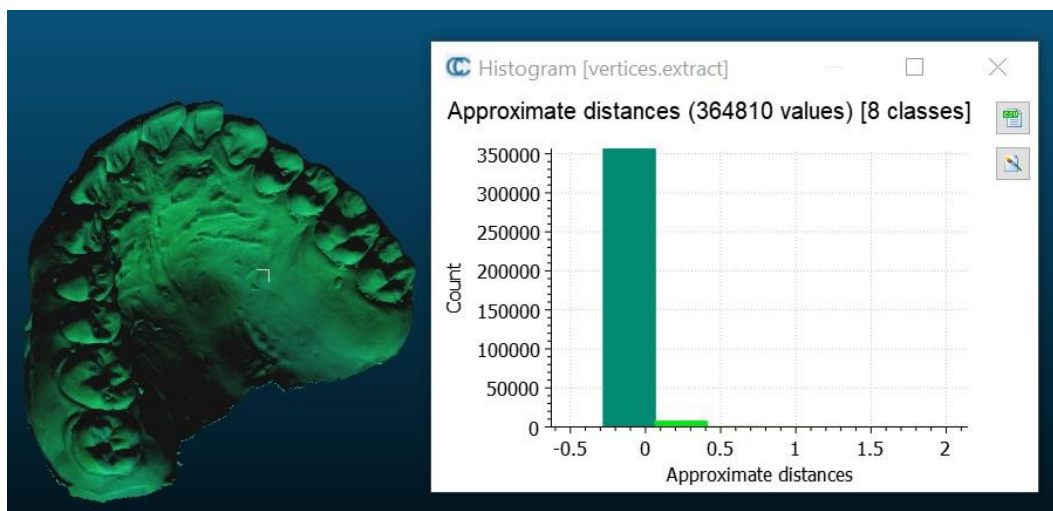

Fig 20: J09 upper jaw .

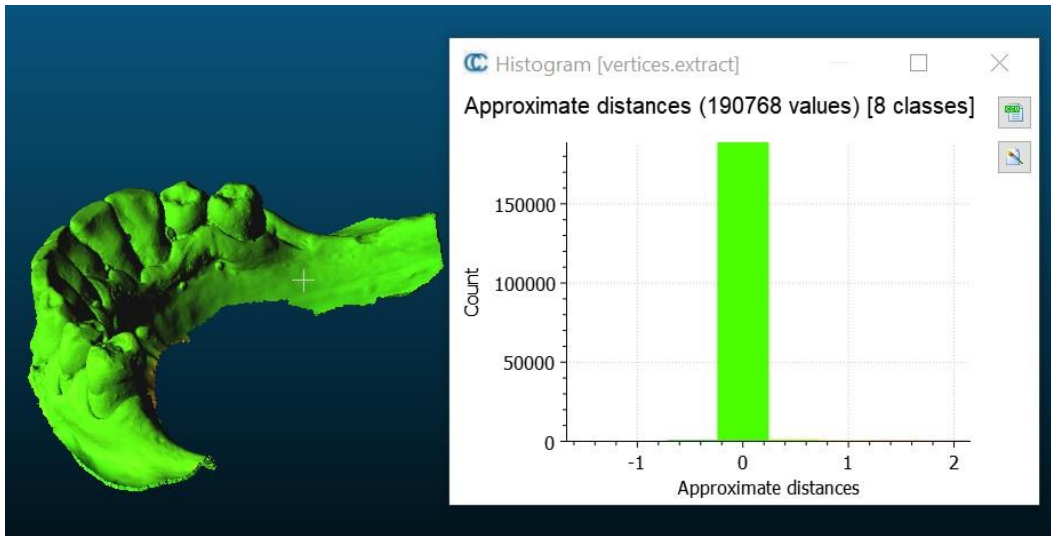

Fig 21: J10 lower jaw .

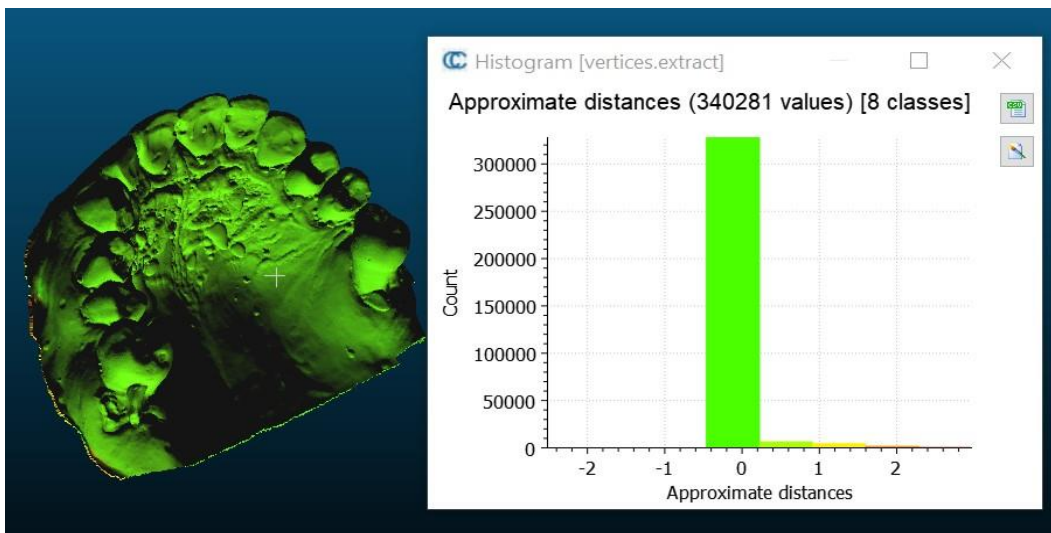

Fig 22: J10 upper jaw .

IOS1 + OP2

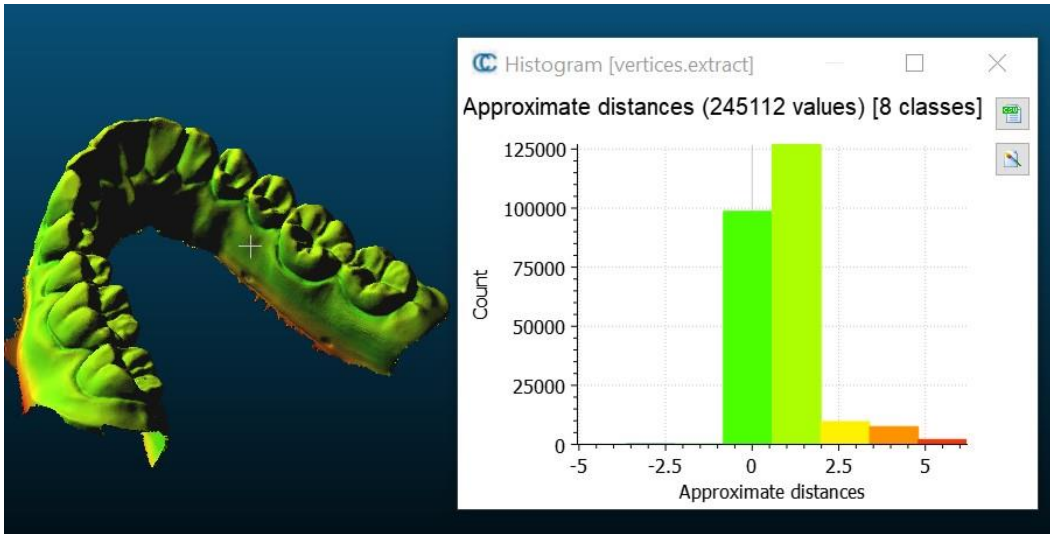

Fig 1: T standard model lower jaw .

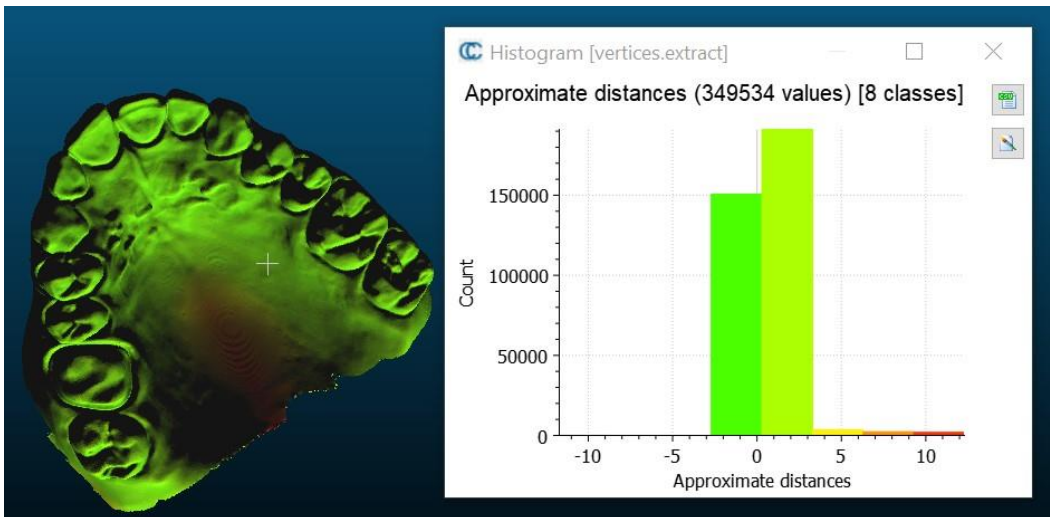

Fig 2: T standard model upper jaw .

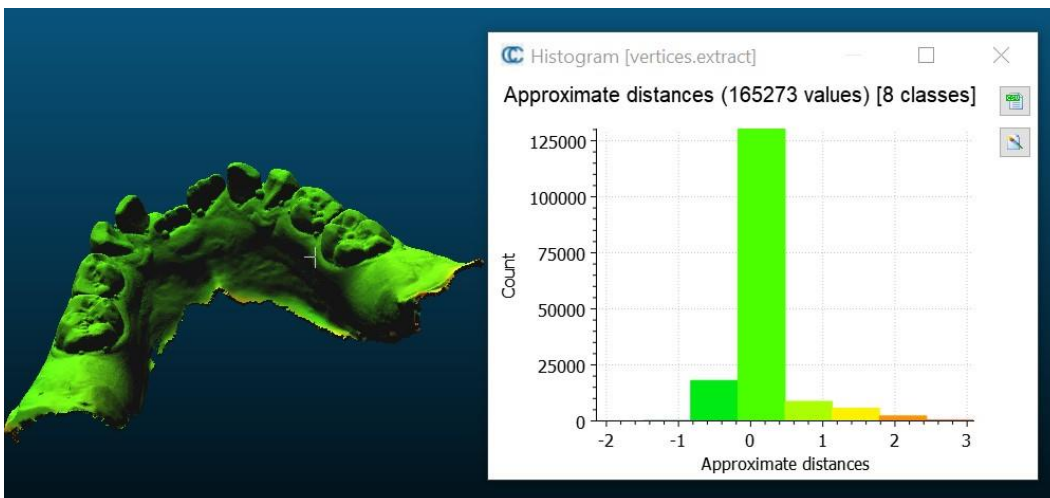

Fig 3: T01 lower jaw .



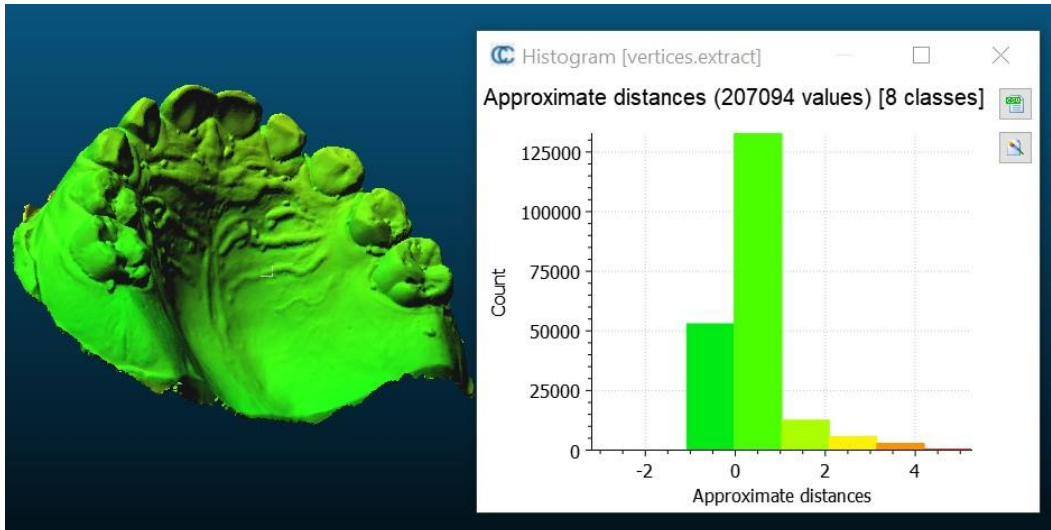

Fig 4: T01 upper jaw .

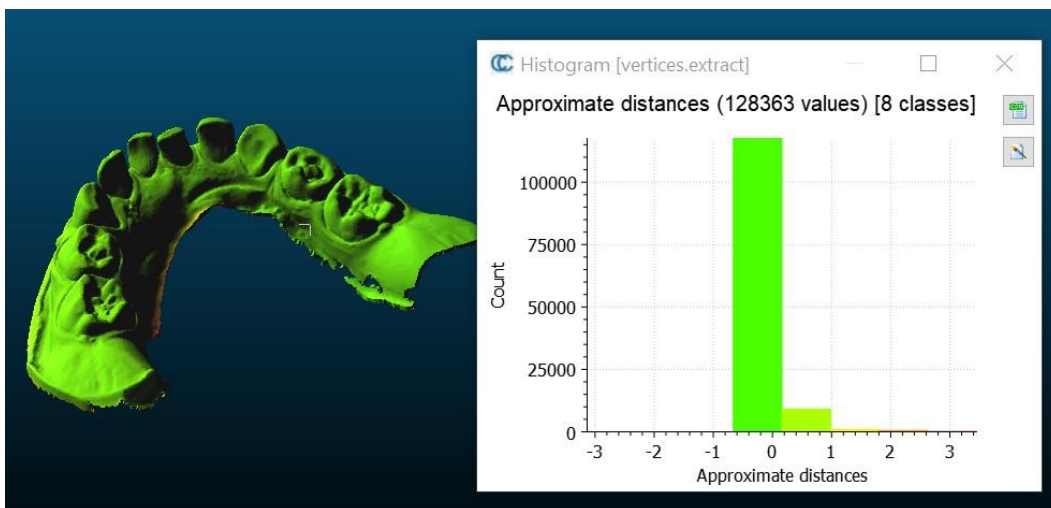

Fig 5: T02 lower jaw .

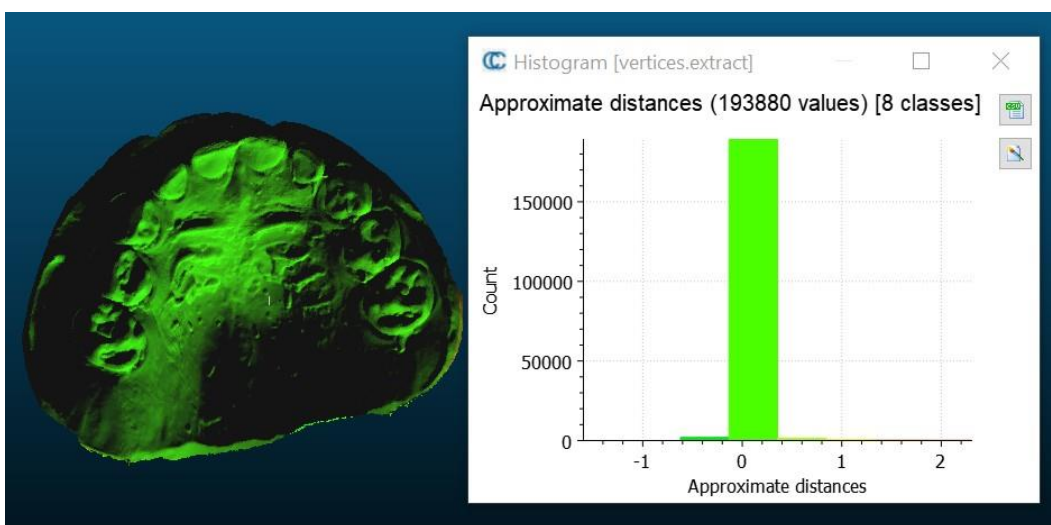

Fig 6: T02 upper jaw .



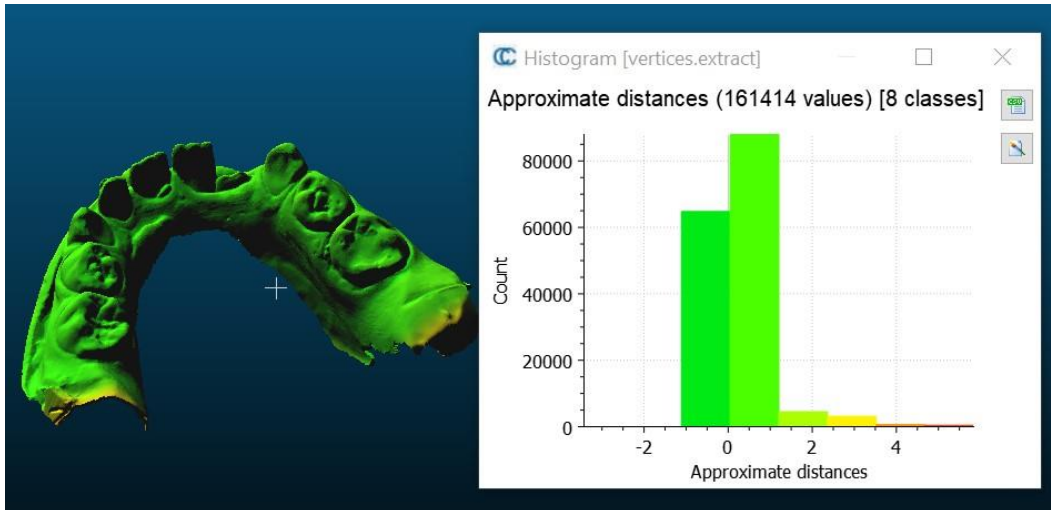

Fig 7: T03 lower jaw .

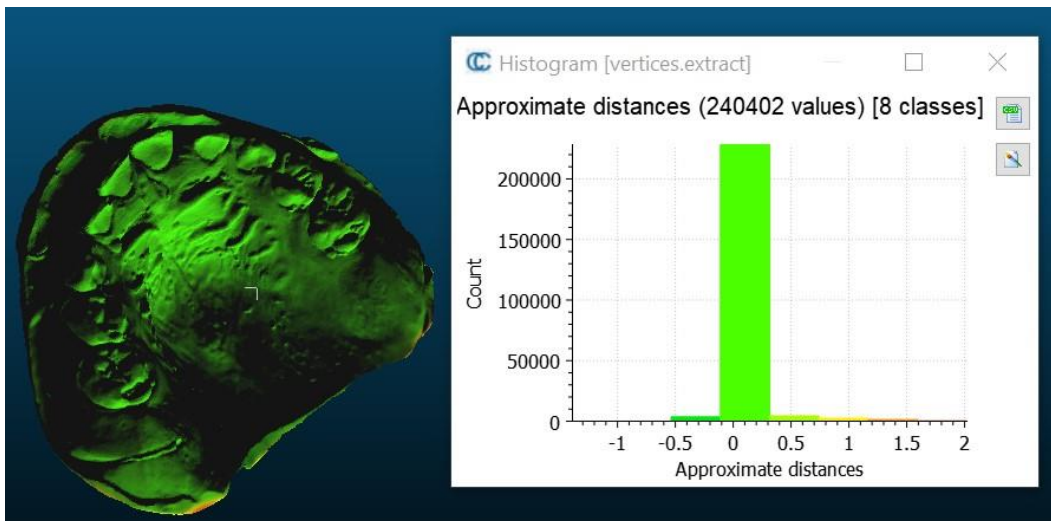

Fig 8: T03 upper jaw .

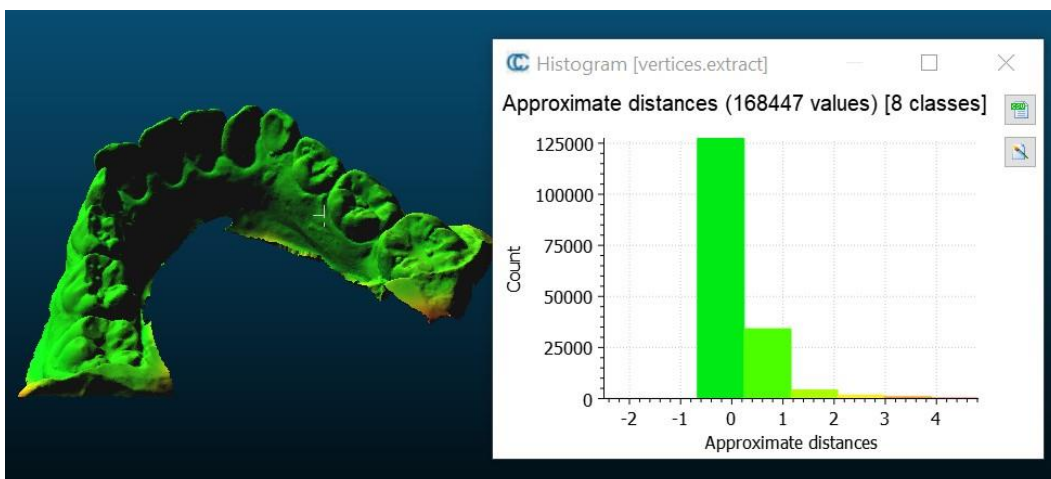

Fig 9: T04 lower jaw .

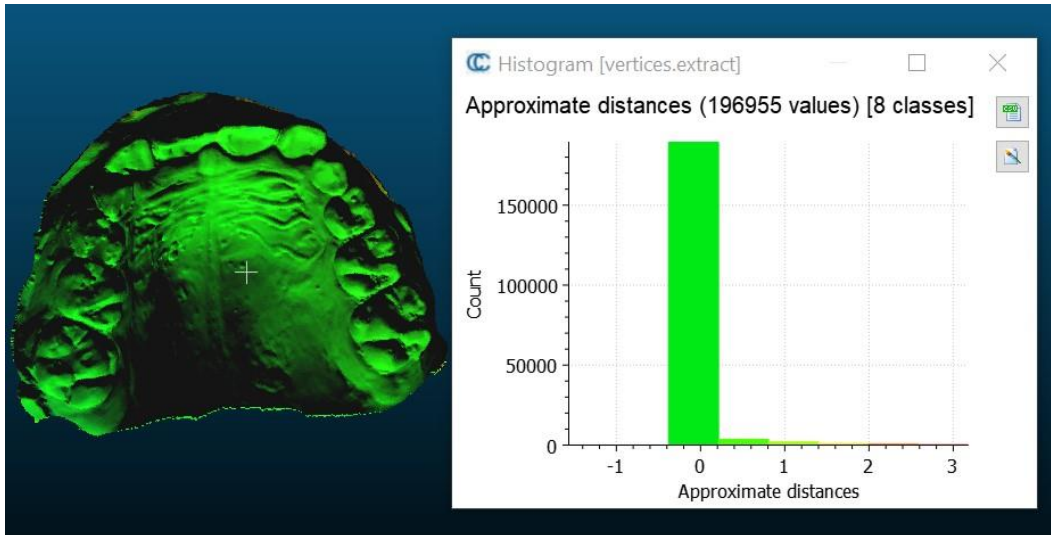

Fig 10: T04 upper jaw .

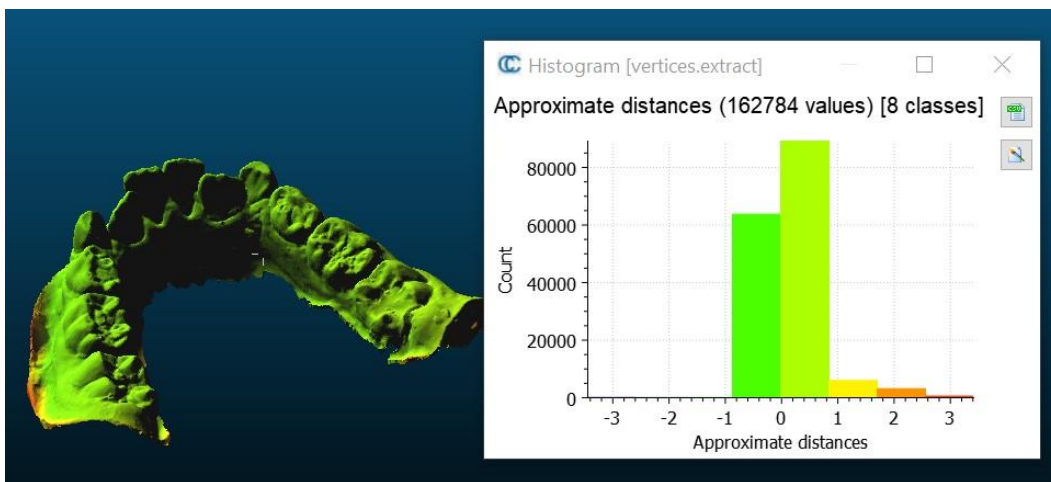

Fig 11: T05 lower jaw .

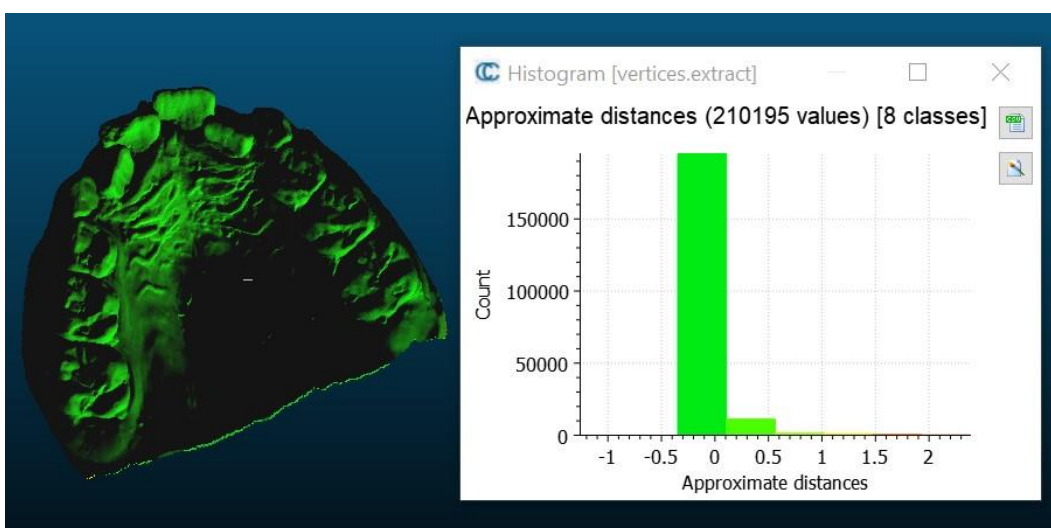

Fig 12: T05 upper jaw .

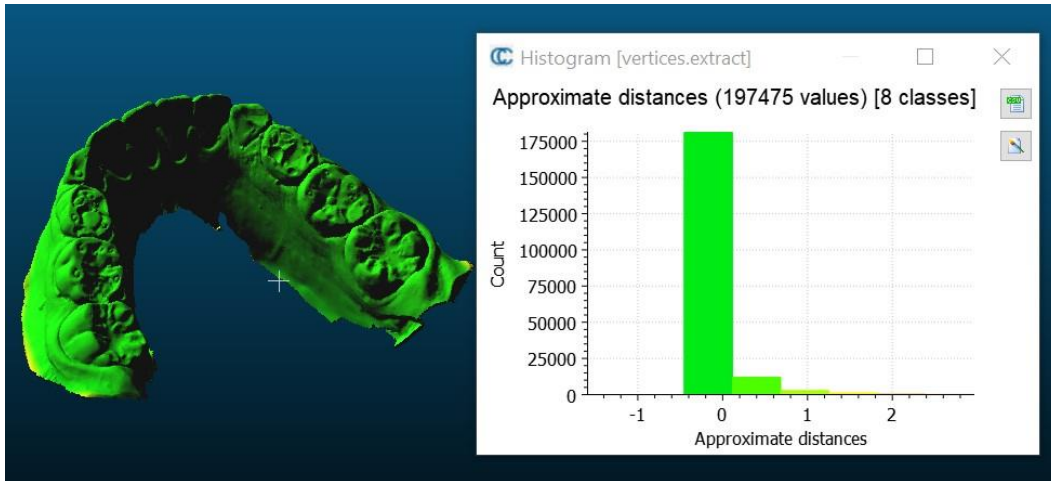

Fig 13: T06 lower jaw .

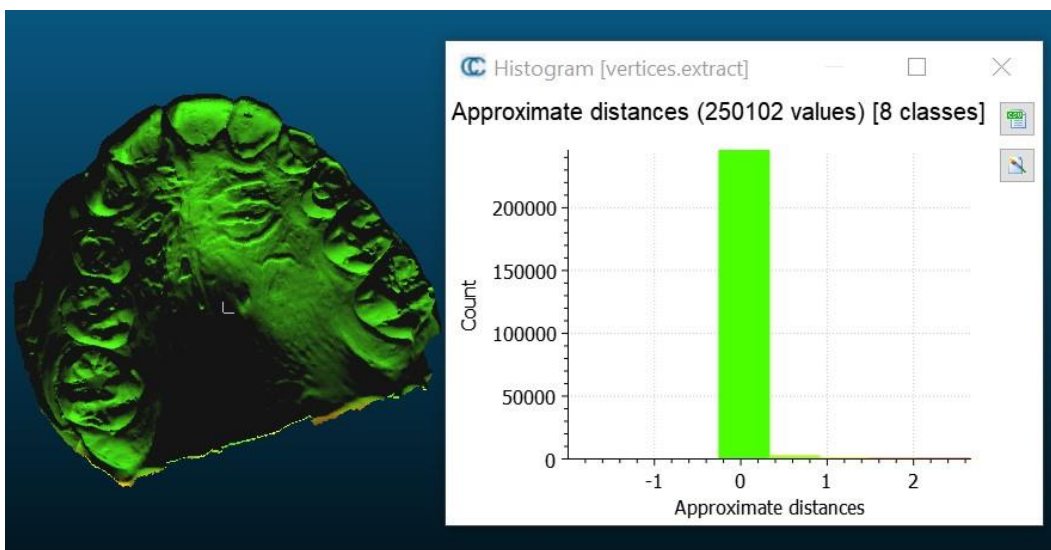

Fig 14: T06 upper jaw .

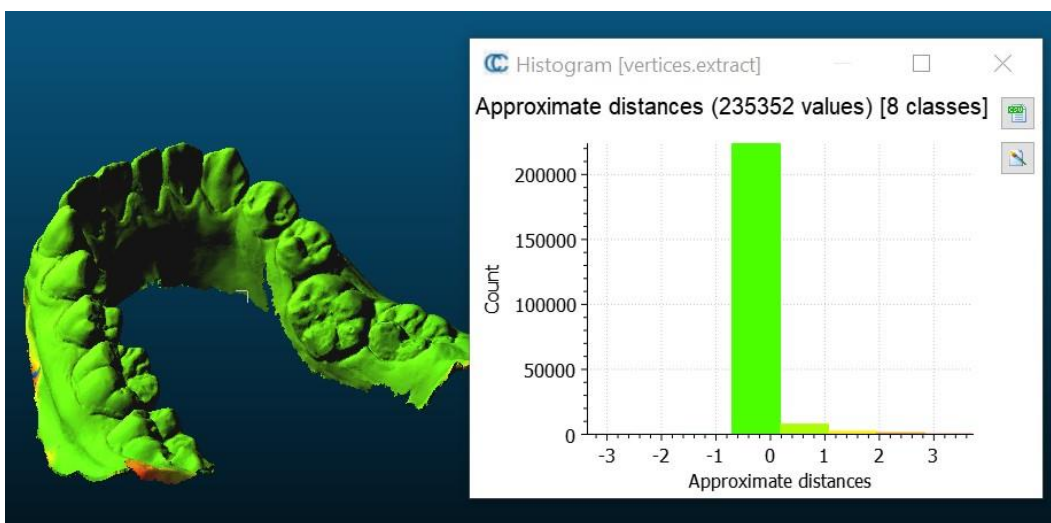

Fig 15: T07 lower jaw .

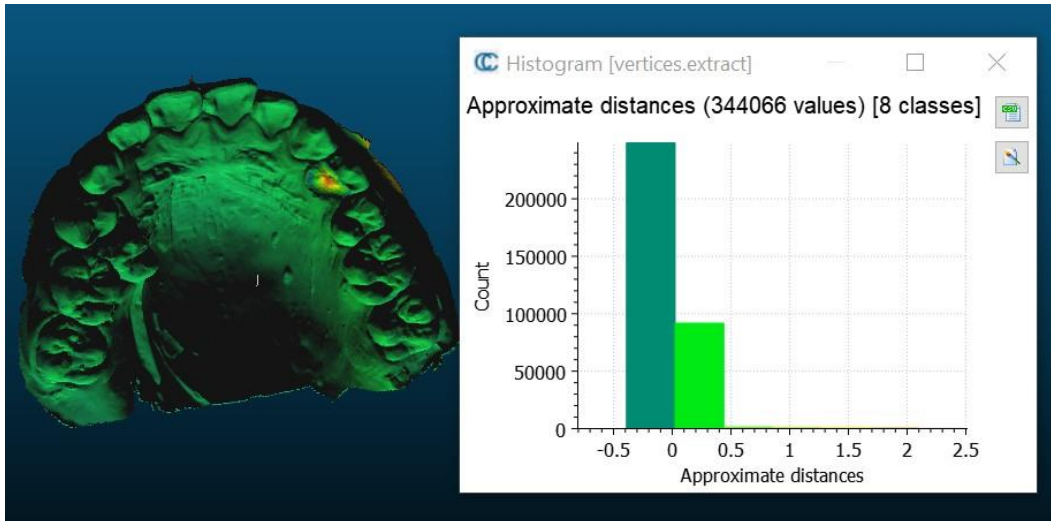

Fig 16: T07 upper jaw .

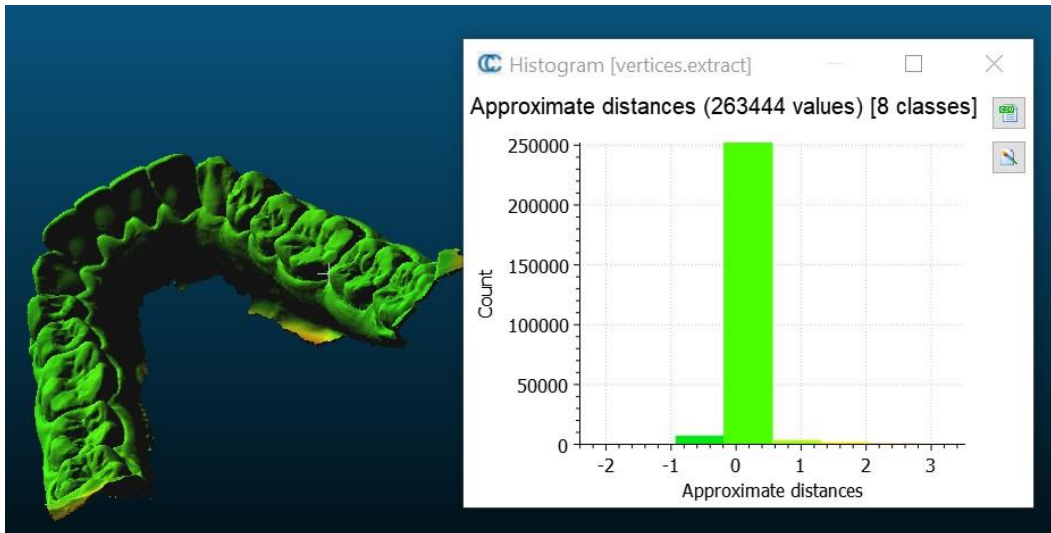

Fig 17: T08 lower jaw .

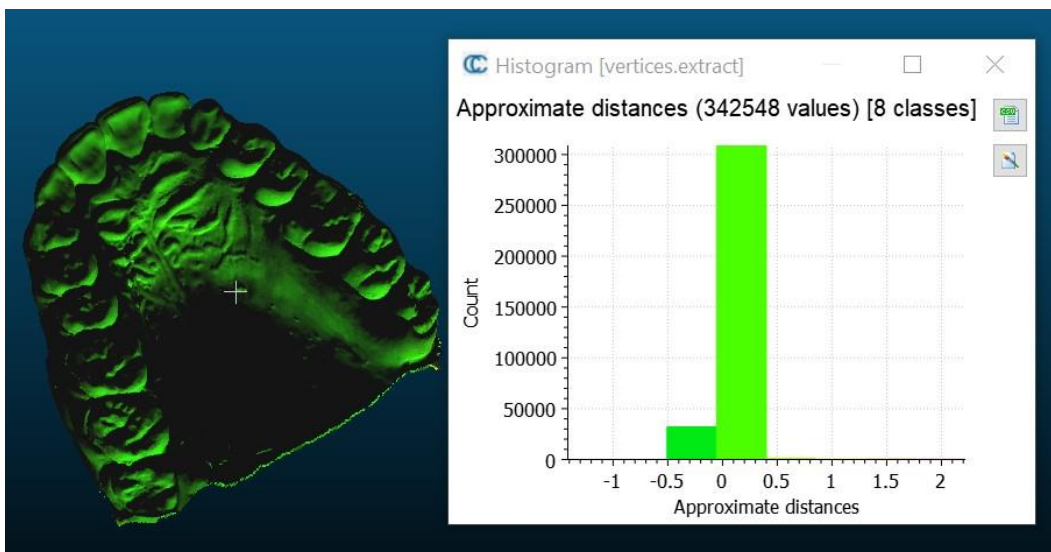

Fig 18: T08 upper jaw .



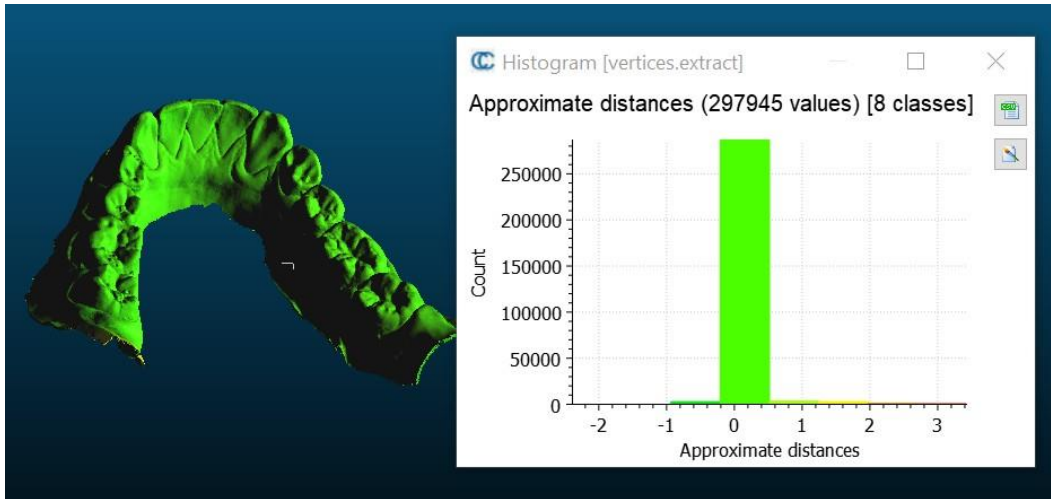

Fig 19: T09 lower jaw .

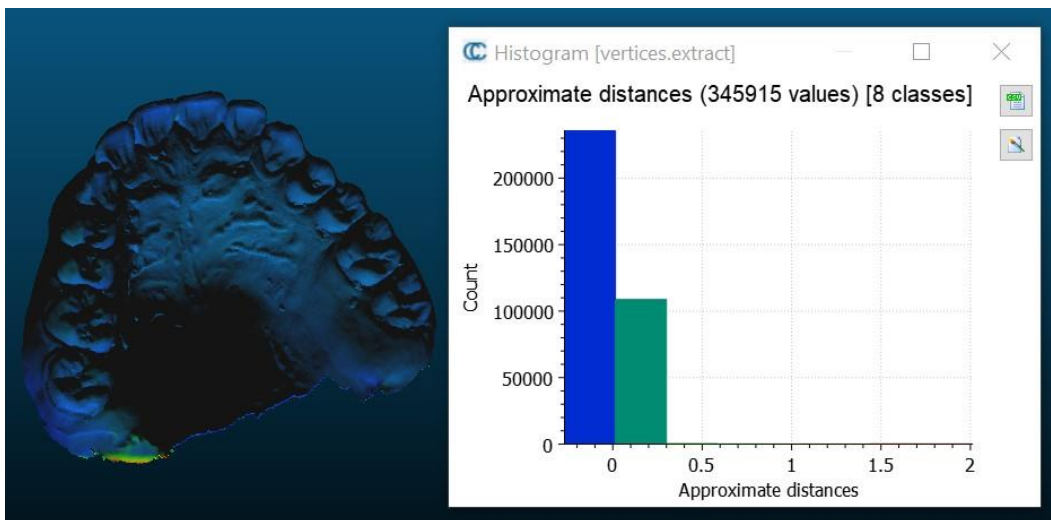

Fig 20: T09 upper jaw .

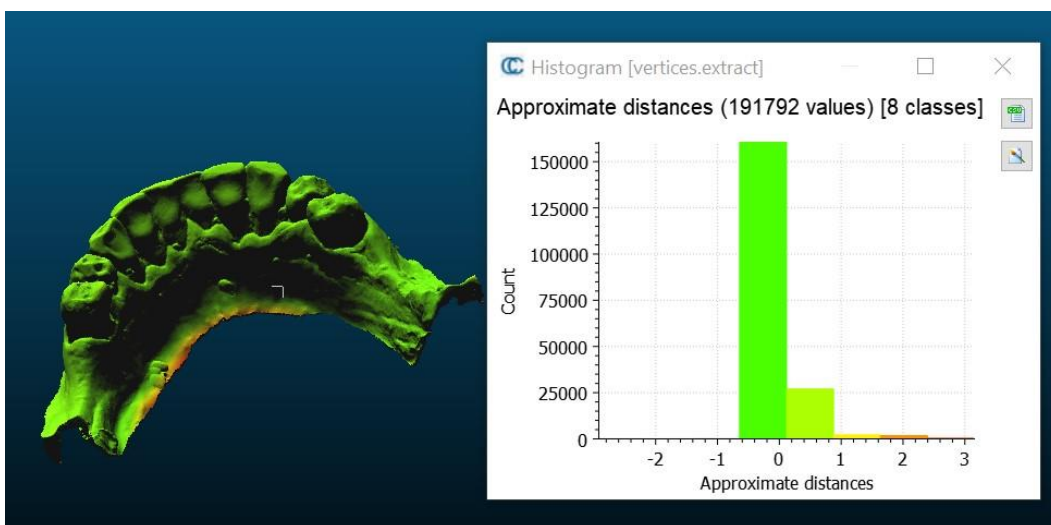

Fig 21: T10 lower jaw .



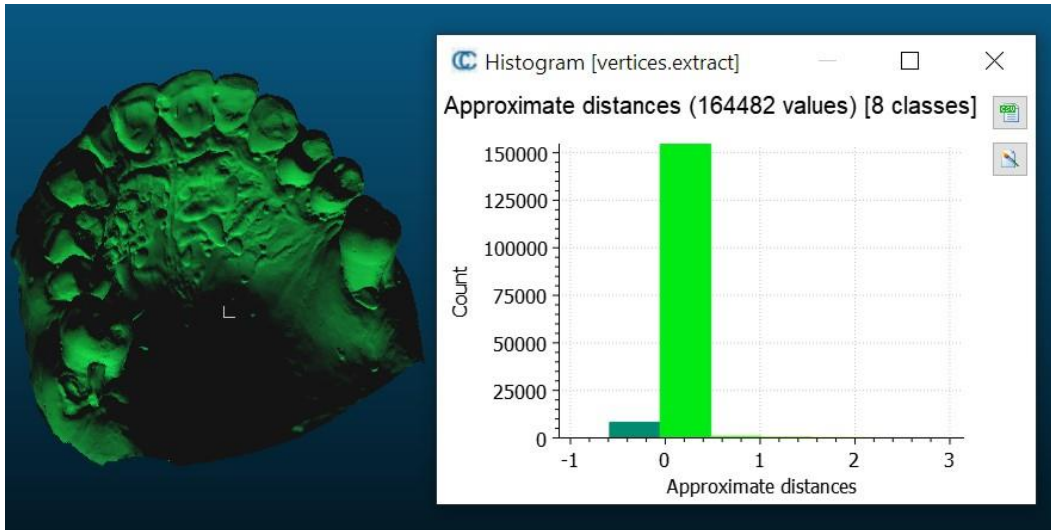

Fig 22: T10 upper jaw .

IOS2 + OP1

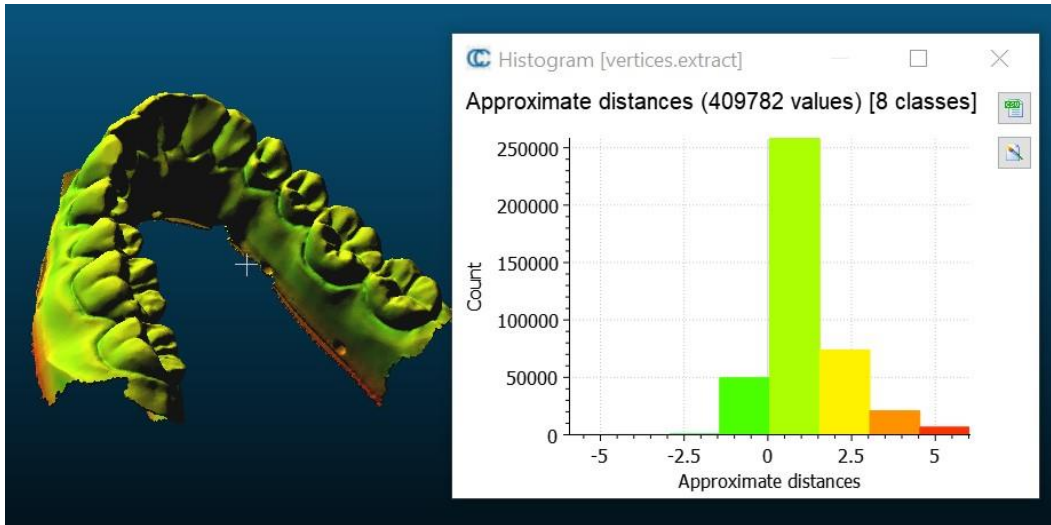

Fig 1: J standard model lower jaw .

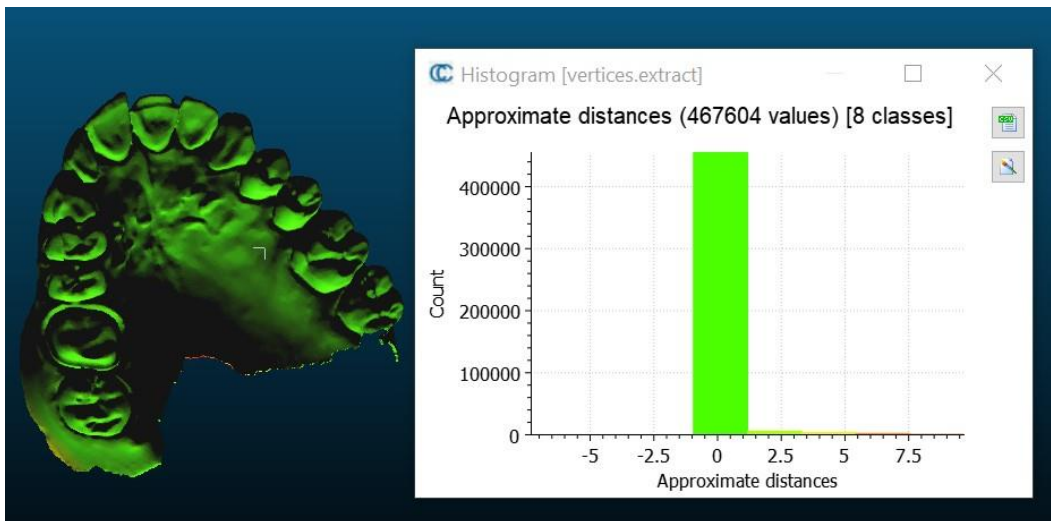

Fig 2: J standard model upper jaw .

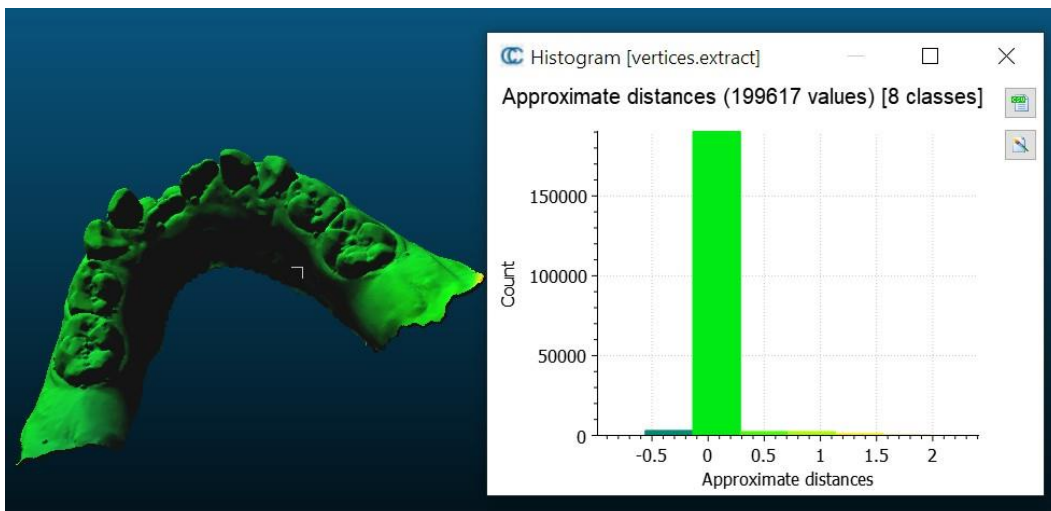

Fig 3: J01 lower jaw .

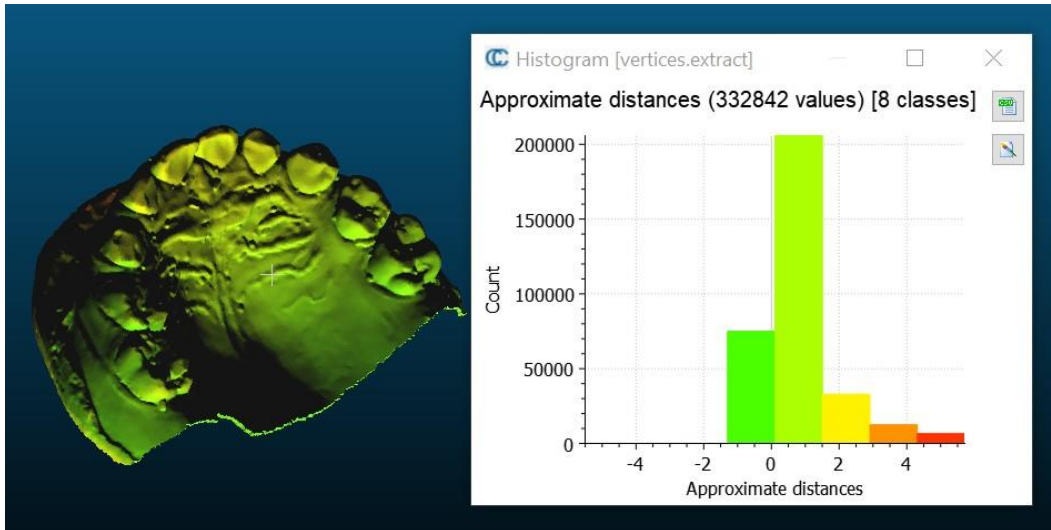

Fig 4: J01 upper jaw .

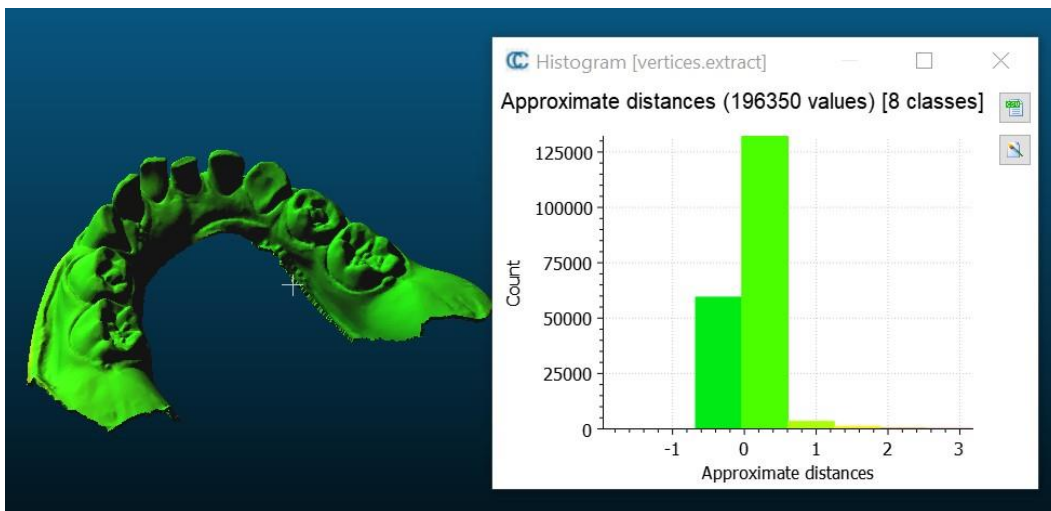

Fig 5: J02 lower jaw .

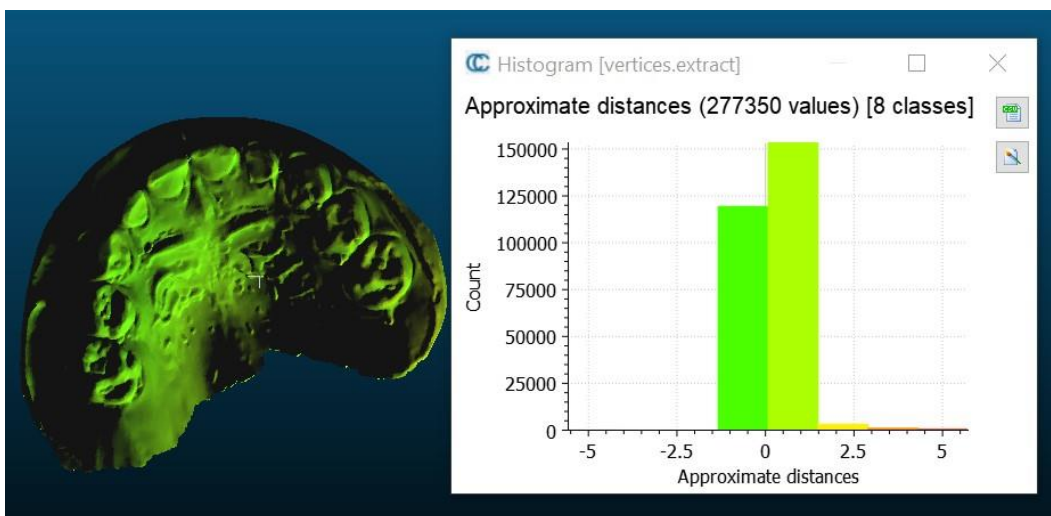

Fig 6: J02 upper jaw .

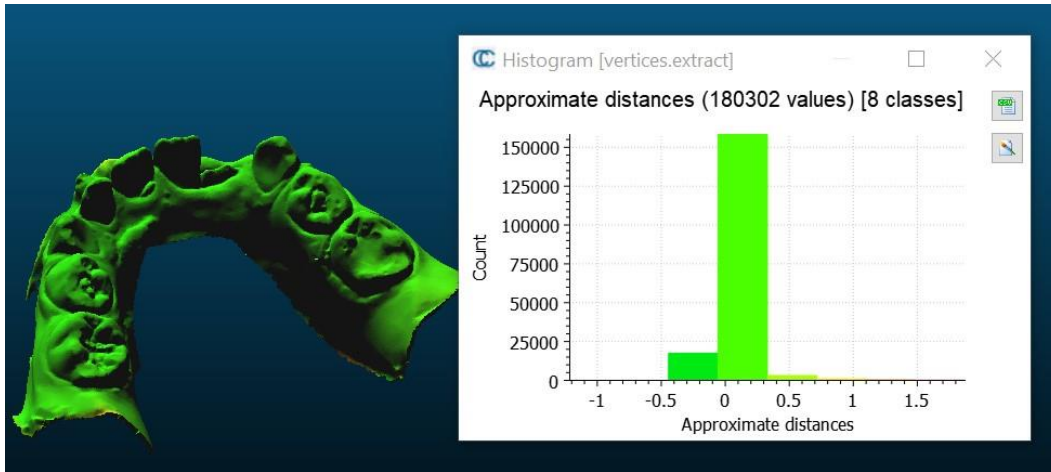

Fig 7: J03 lower jaw .

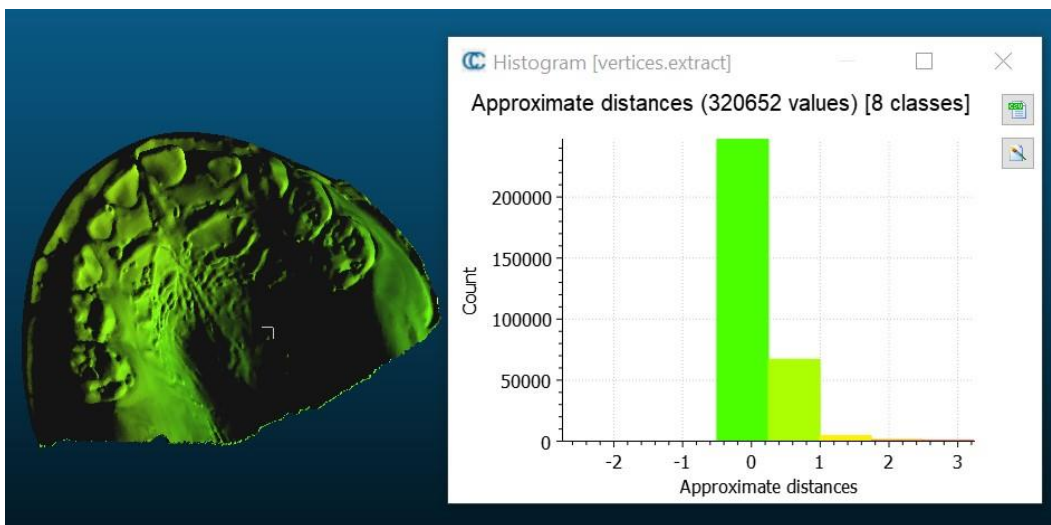

Fig 8: J03 upper jaw .

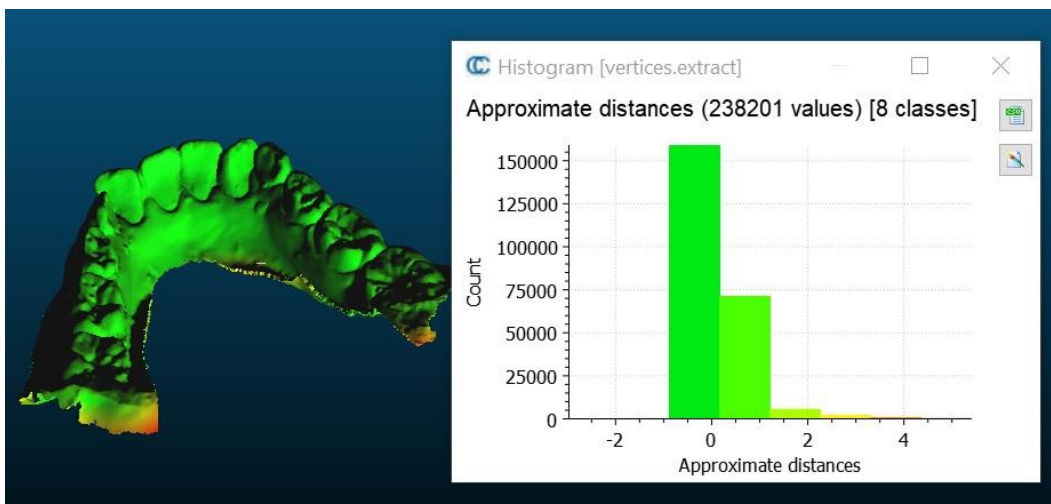

Fig 9: J04 lower jaw .

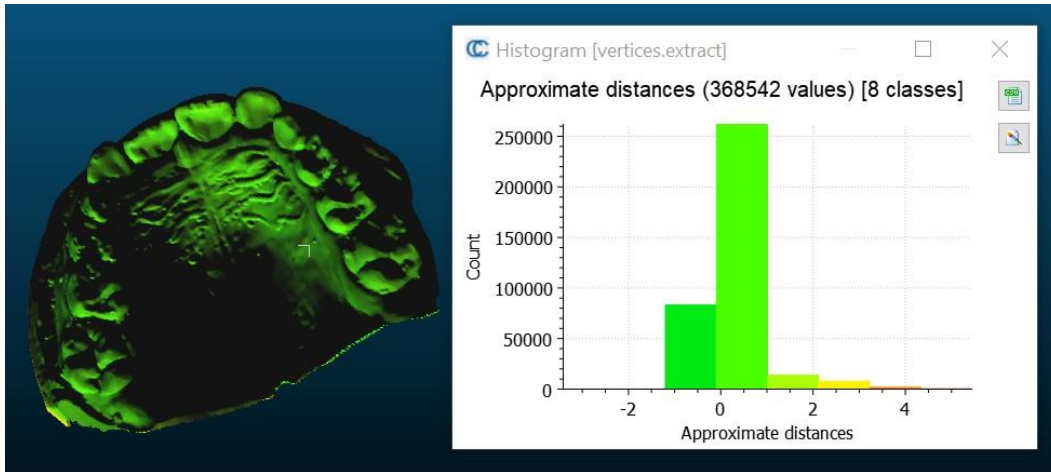

Fig 10: J04 upper jaw .

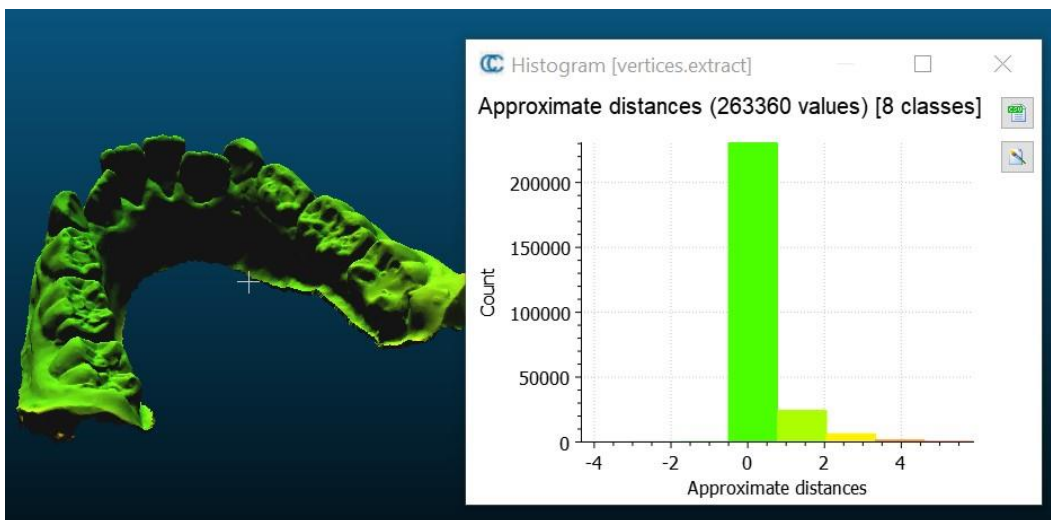

Fig 11: J05 lower jaw .

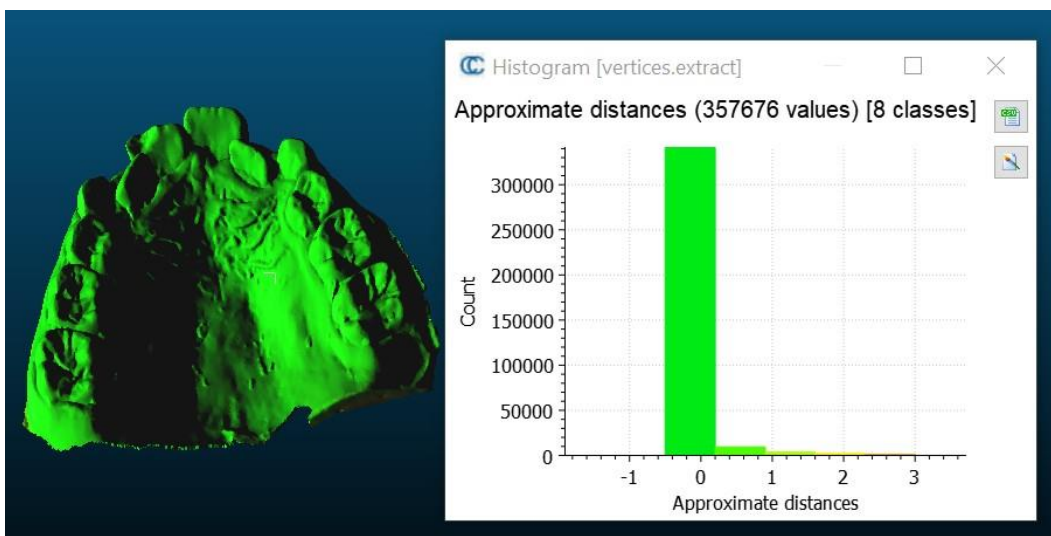

Fig 12: J05 upper jaw .



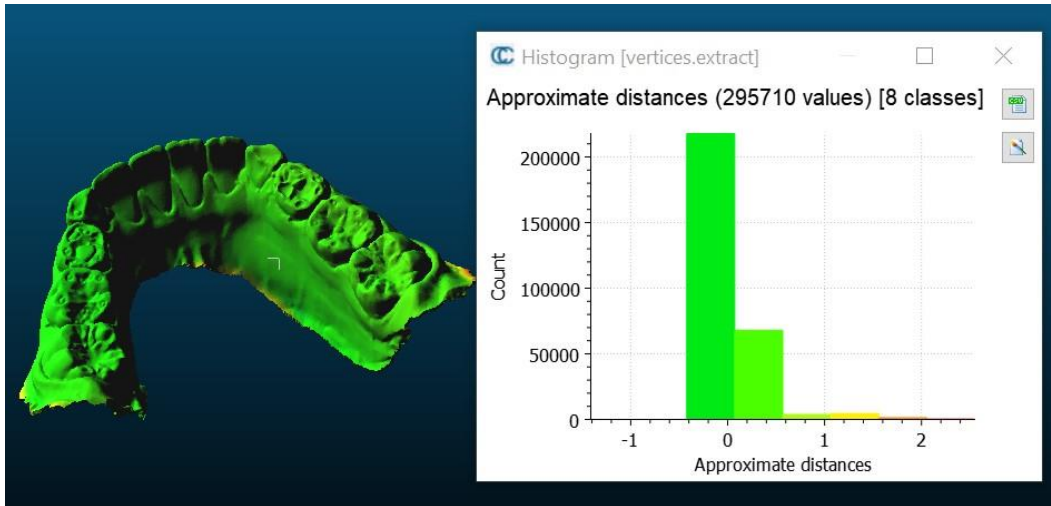

Fig 13: J06 lower jaw .

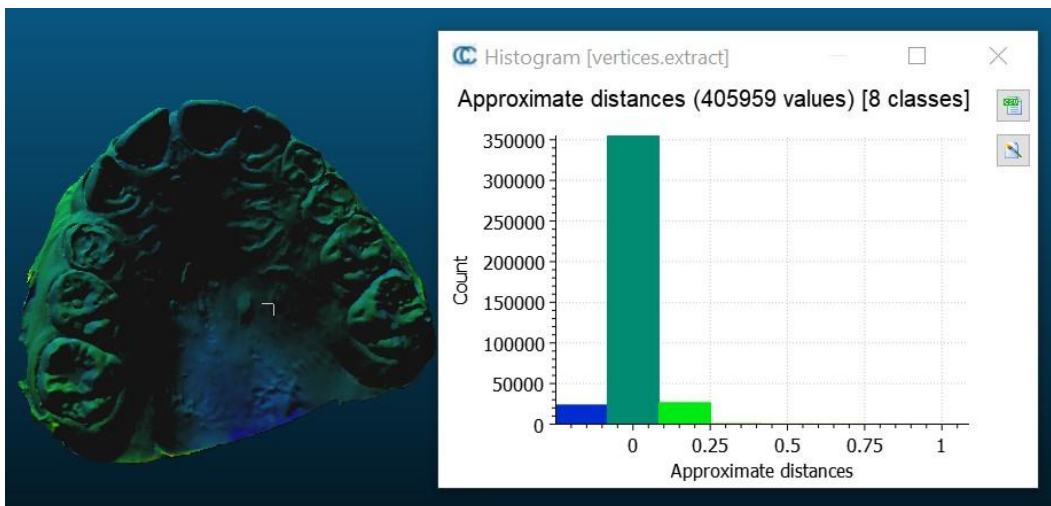

Fig 14: J06 upper jaw .

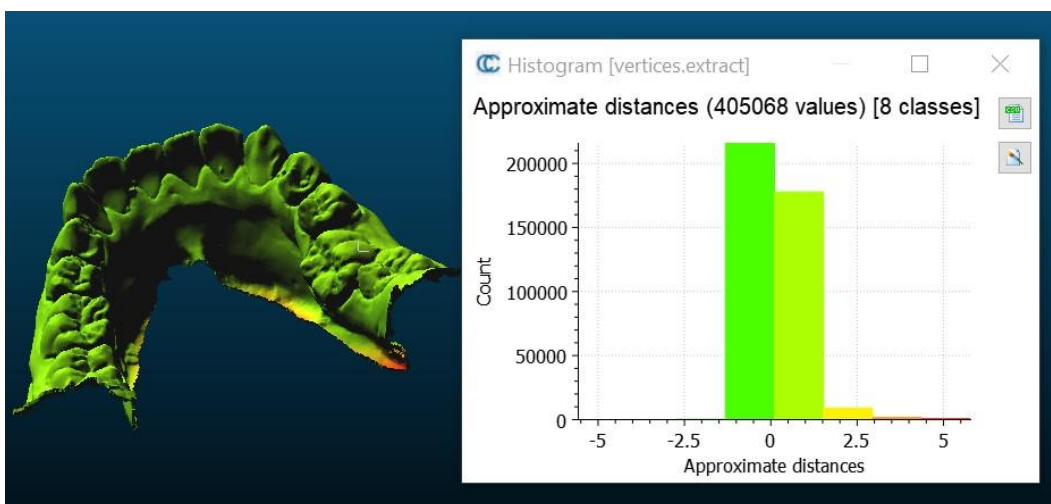

Fig 15: J07 lower jaw .

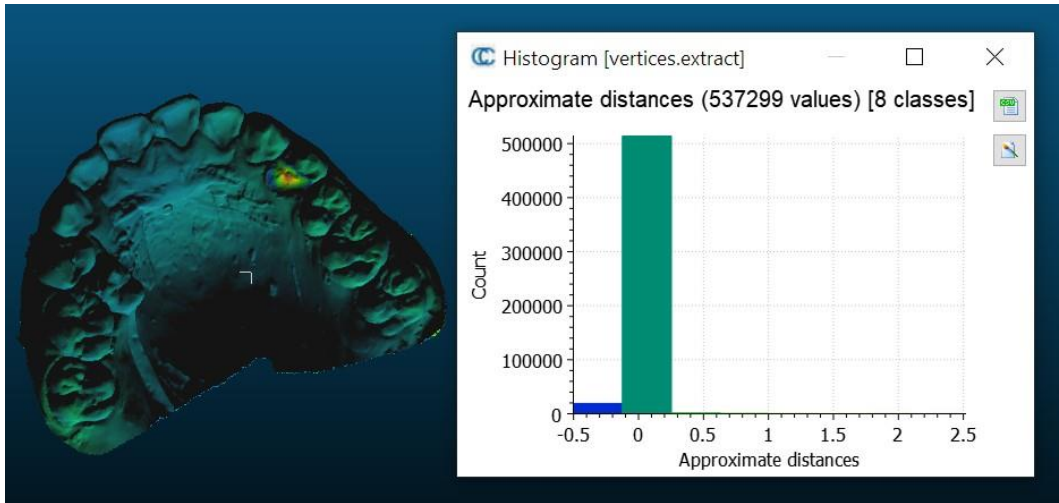

Fig 16: J07 upper jaw .

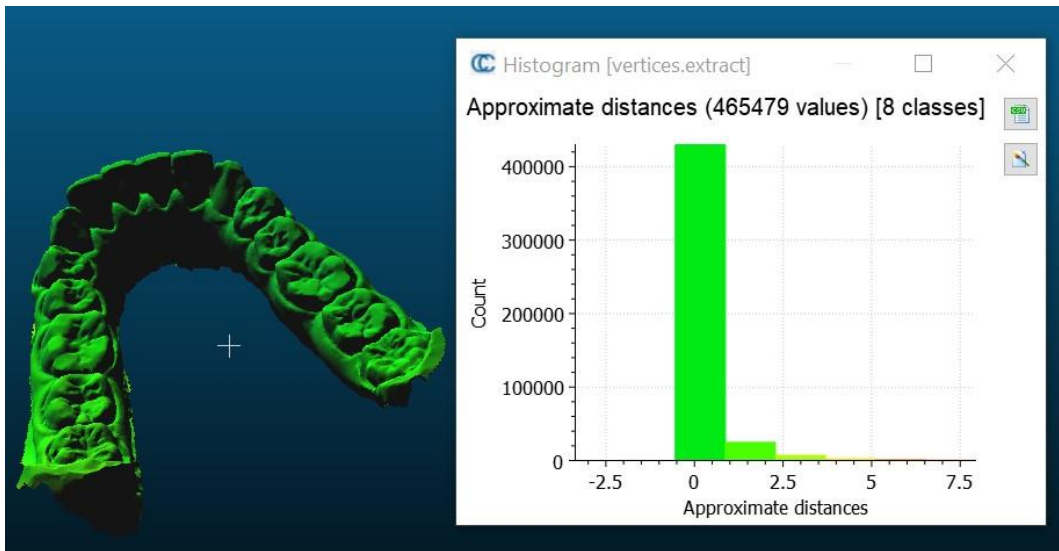

Fig 17: J08 lower jaw .

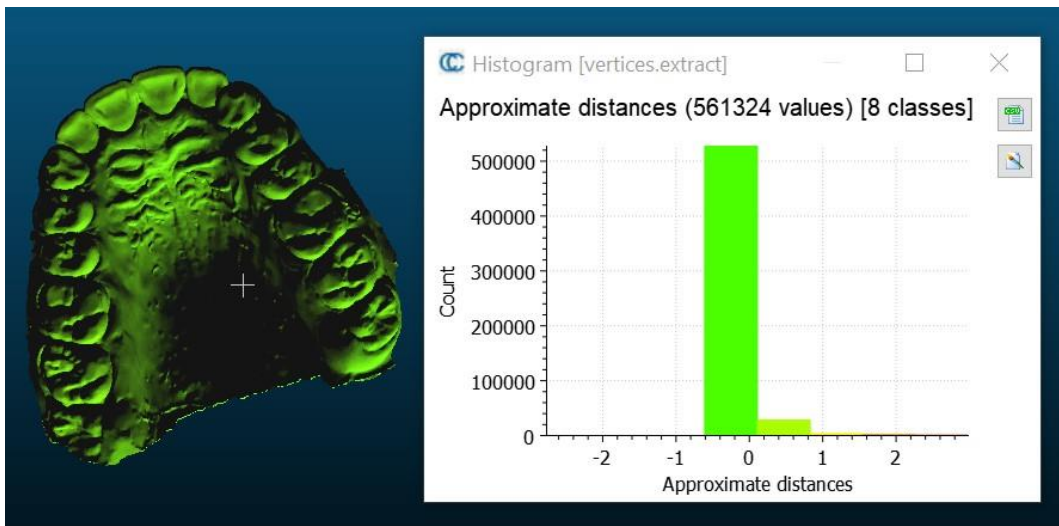

Fig 18: J08 upper jaw .

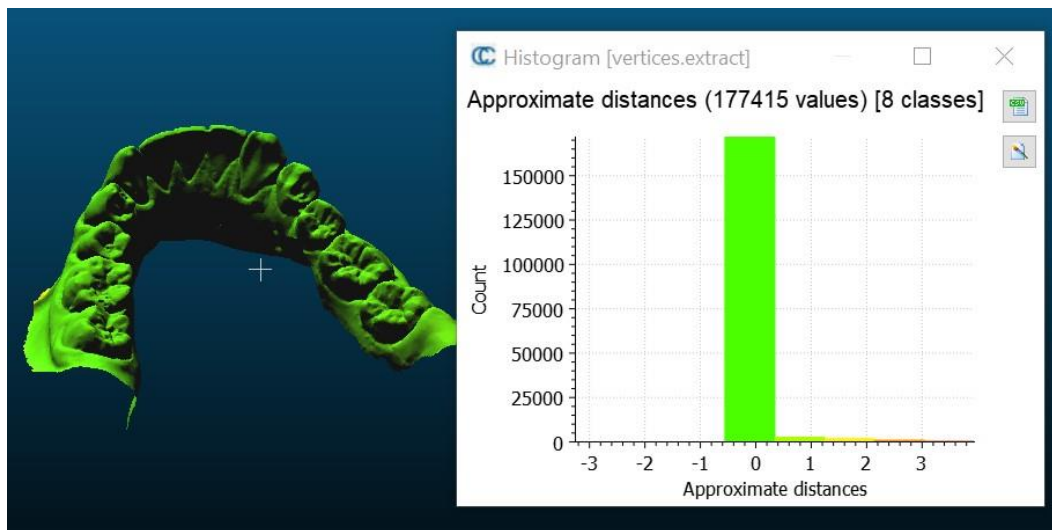

Fig 19: J09 lower jaw .

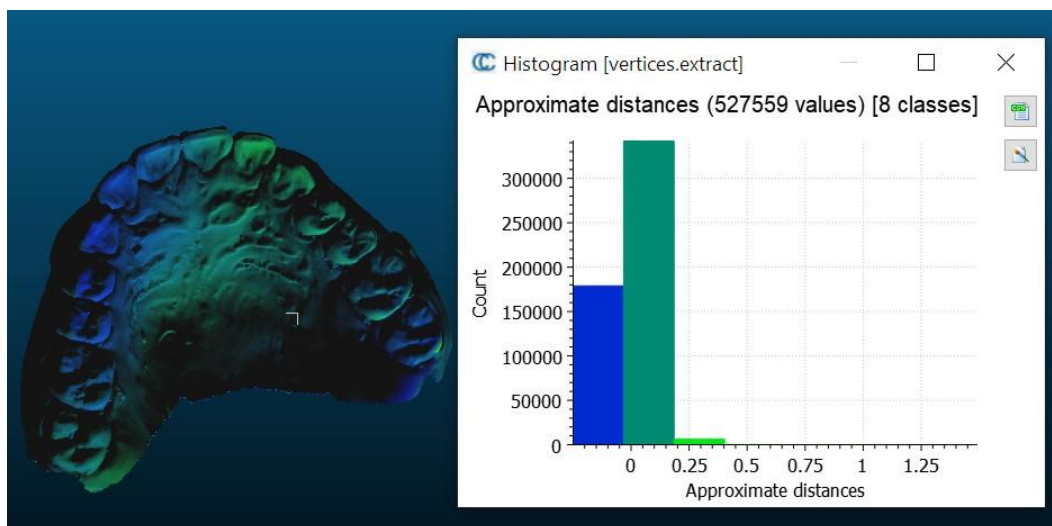

Fig 20: J09 upper jaw .

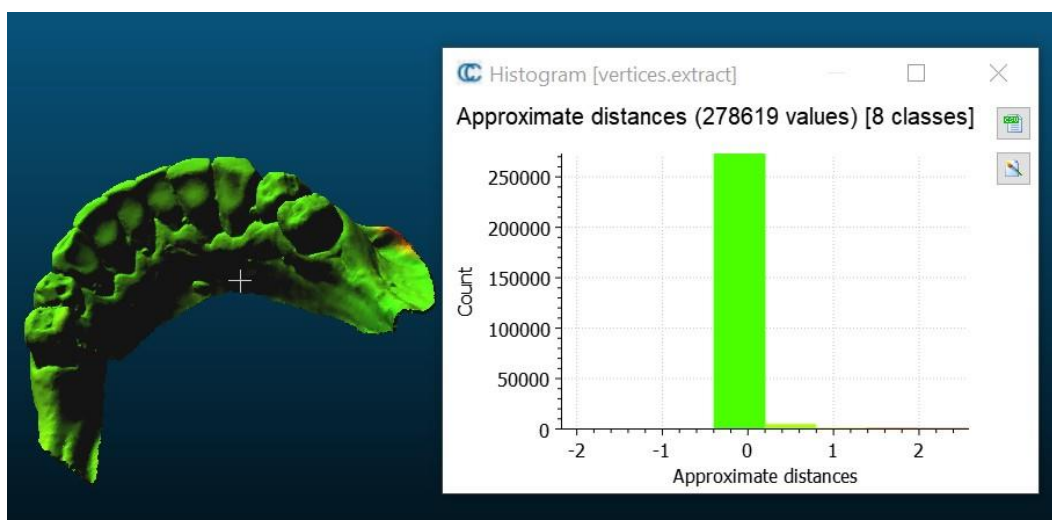

Fig 21: J10 lower jaw .

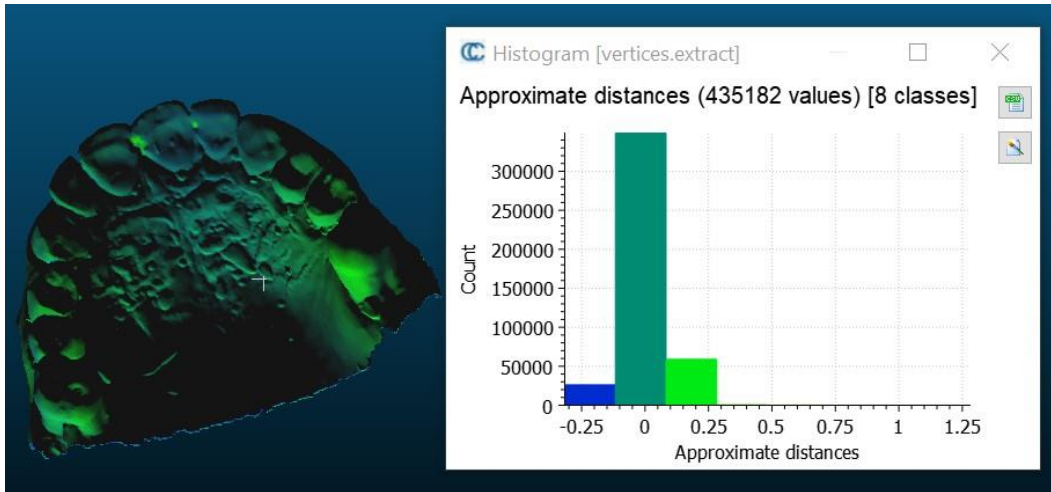

Fig 22: J10 upper jaw .

# IOS2 + OP2

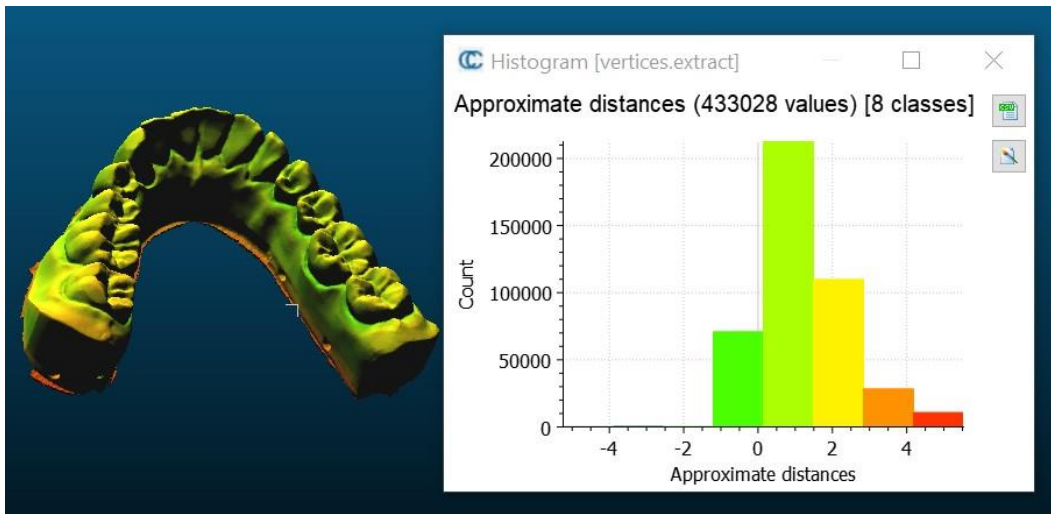

Fig 1: T standard model lower jaw .

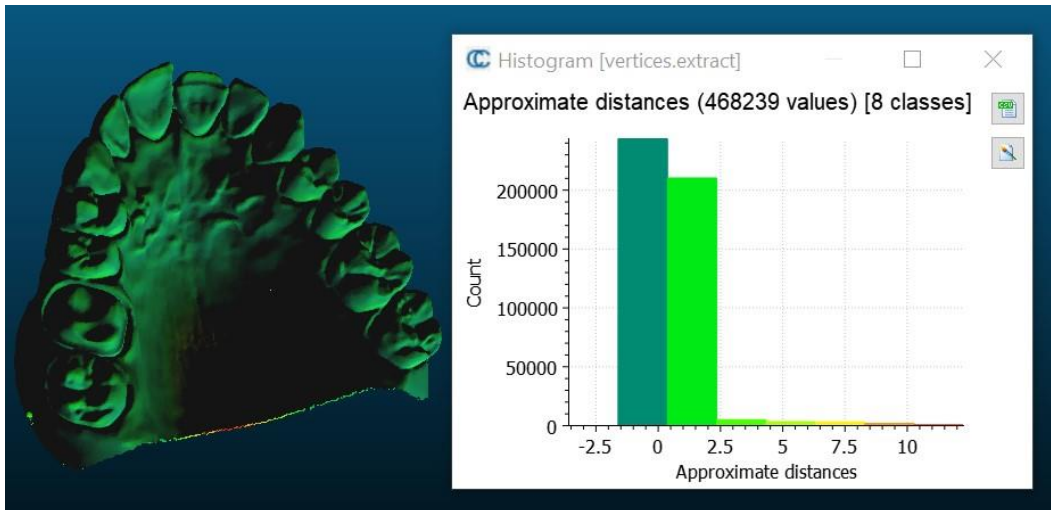

Fig 2: T standard model upper jaw .

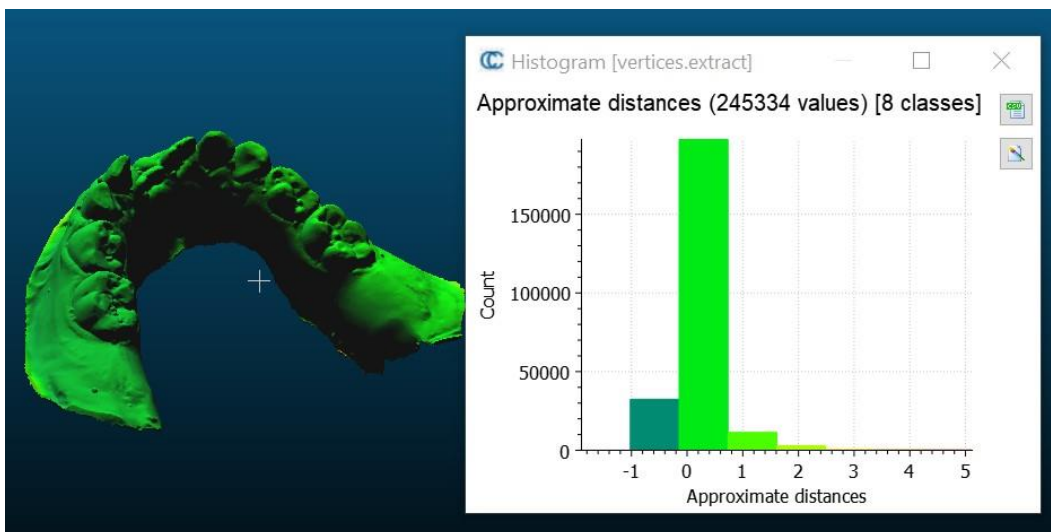



Fig 3: T01 lower jaw .

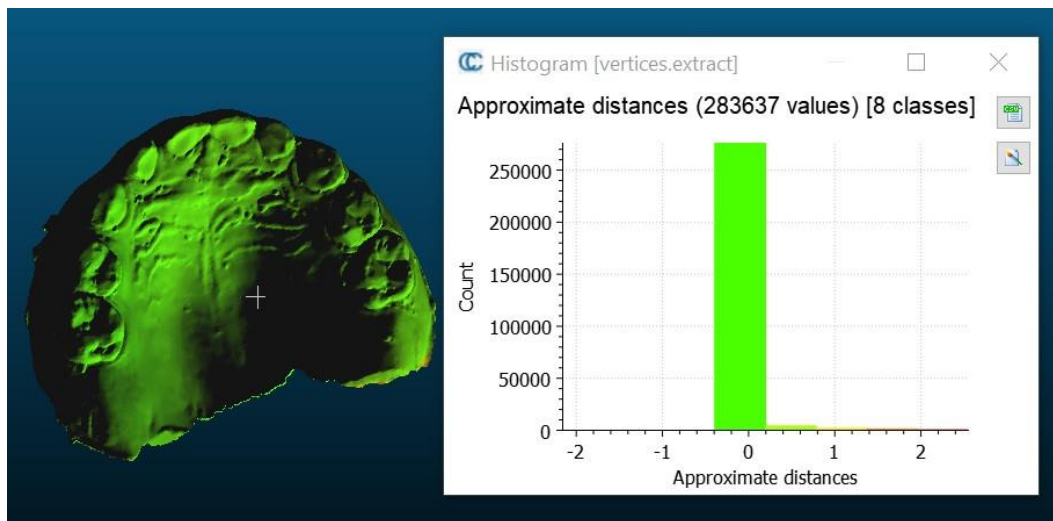

Fig 4: T01 upper jaw .

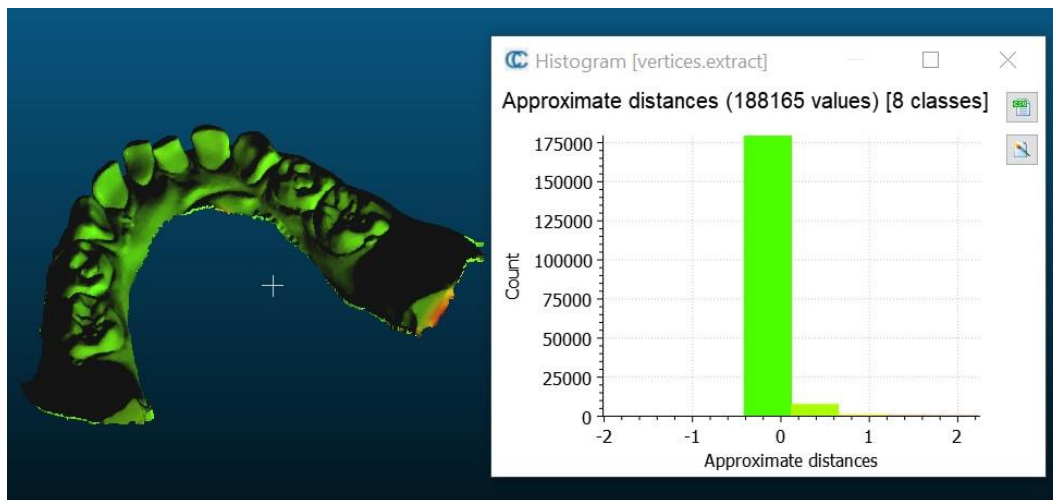

Fig 5: T02 lower jaw .

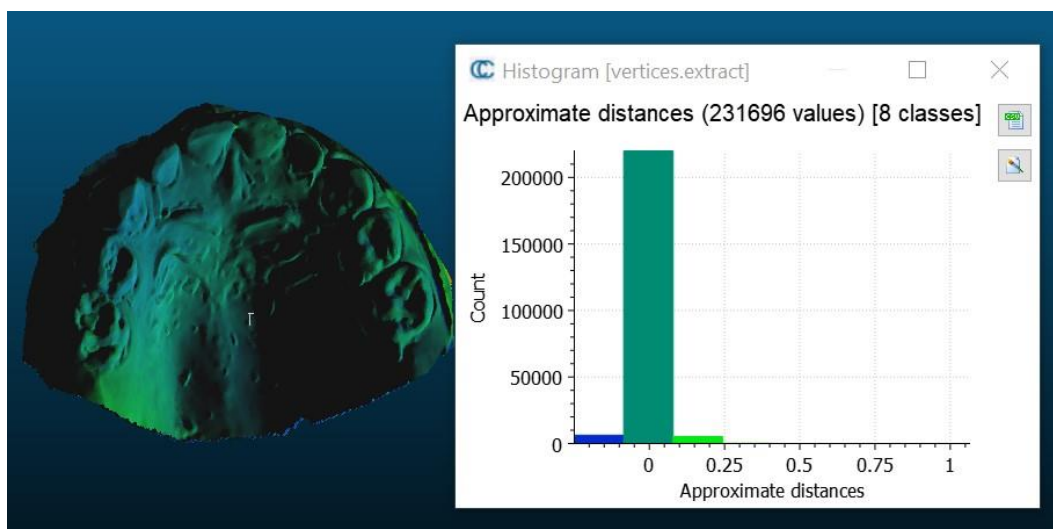

Fig 6: T02 upper jaw .

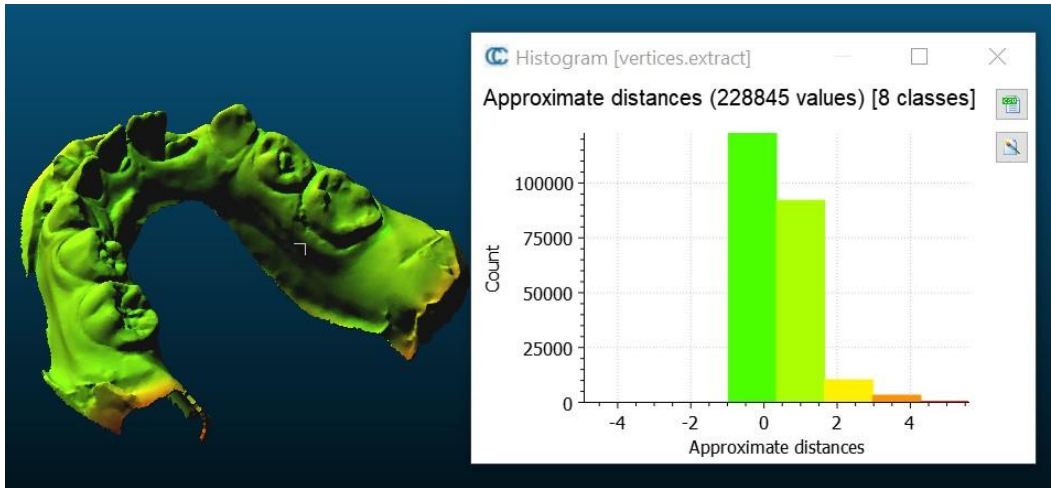

Fig 7: T03 lower jaw .

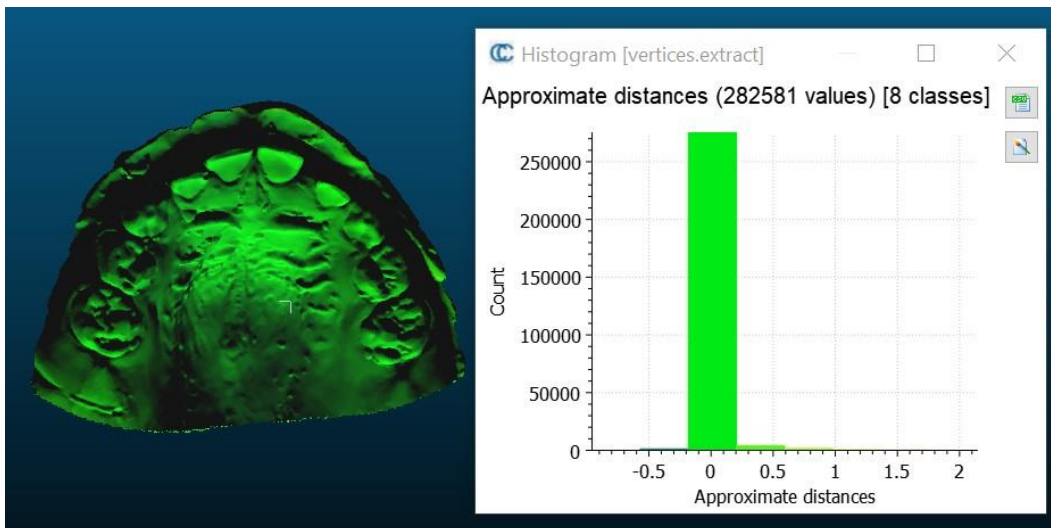

Fig 8: T03 upper jaw .

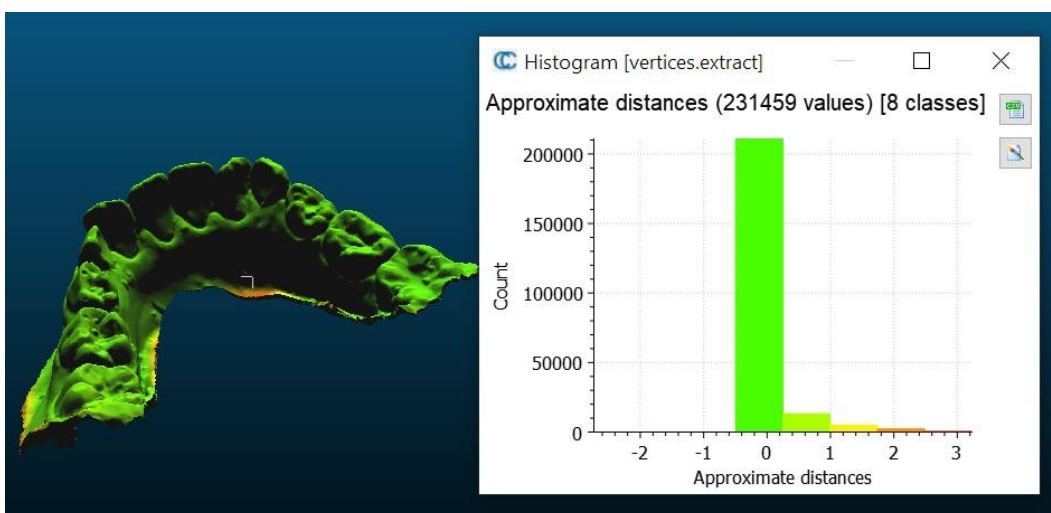

Fig 9: T04 lower jaw .

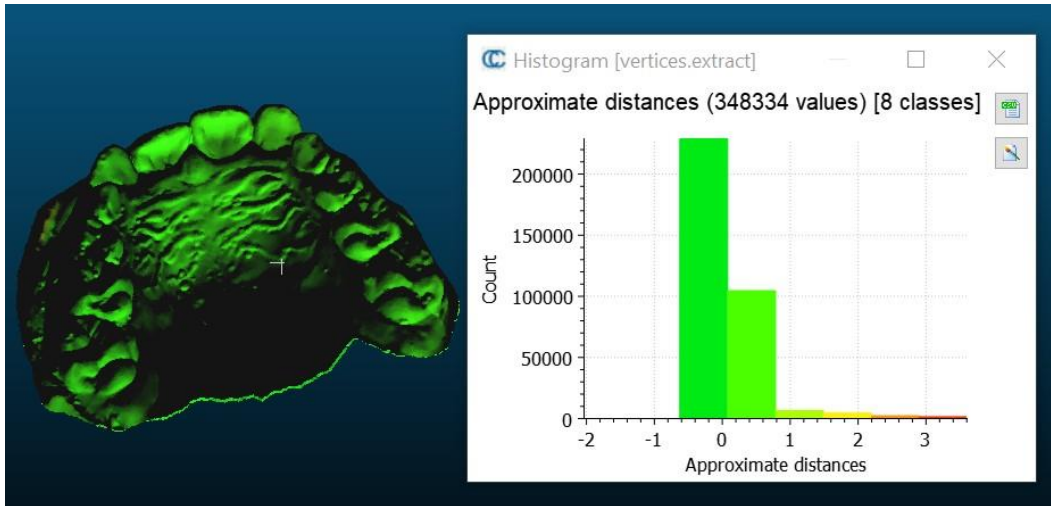

Fig 10: T04 upper jaw .

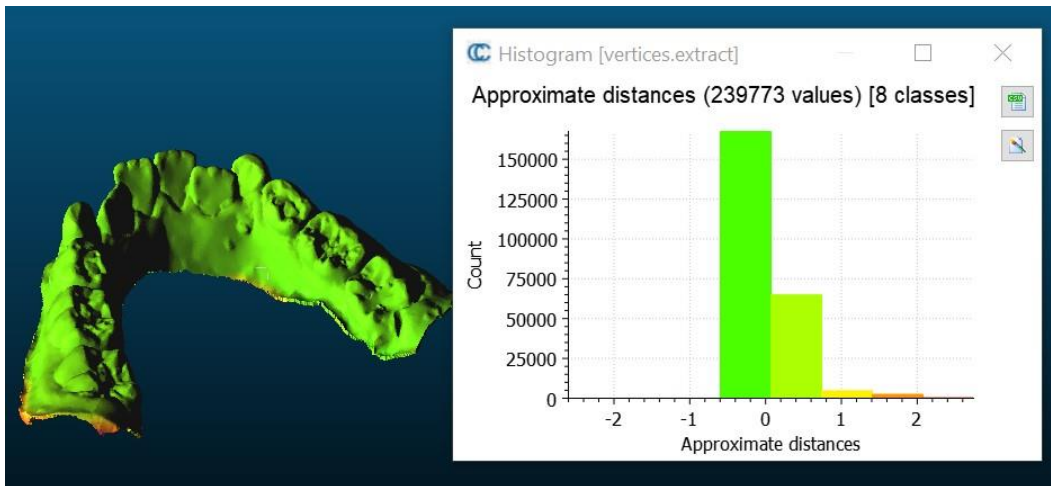

Fig 11: T05 lower jaw .

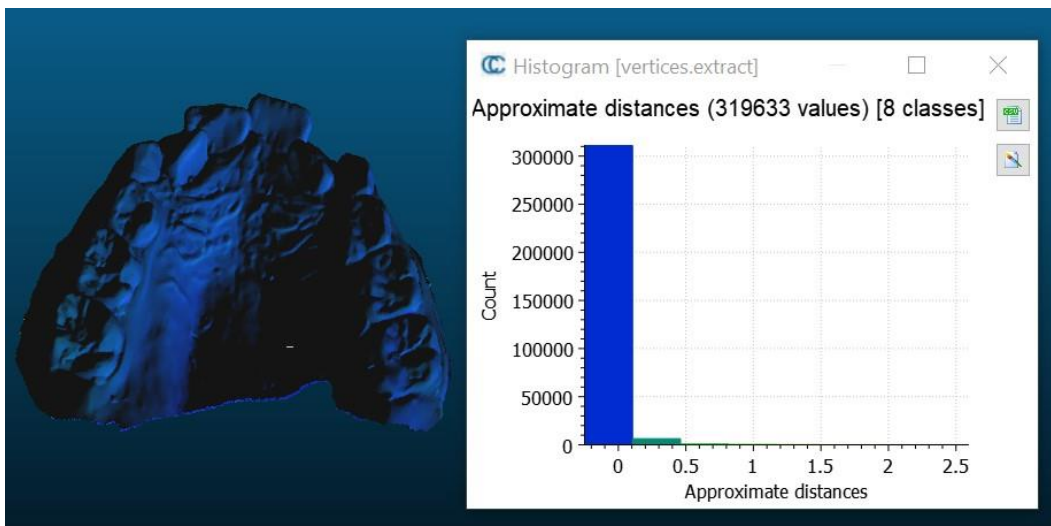

Fig 12: T05 upper jaw .

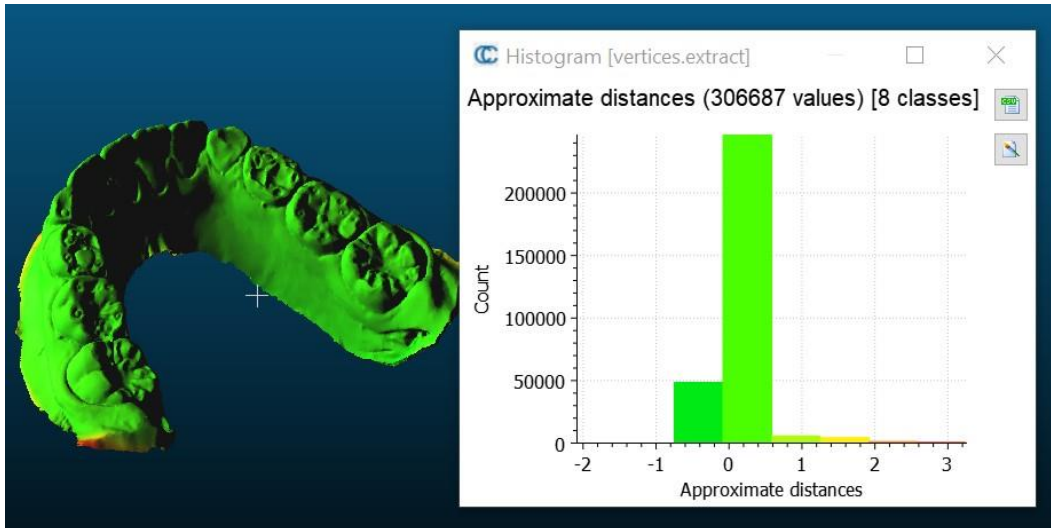

Fig 13: T06 lower jaw .

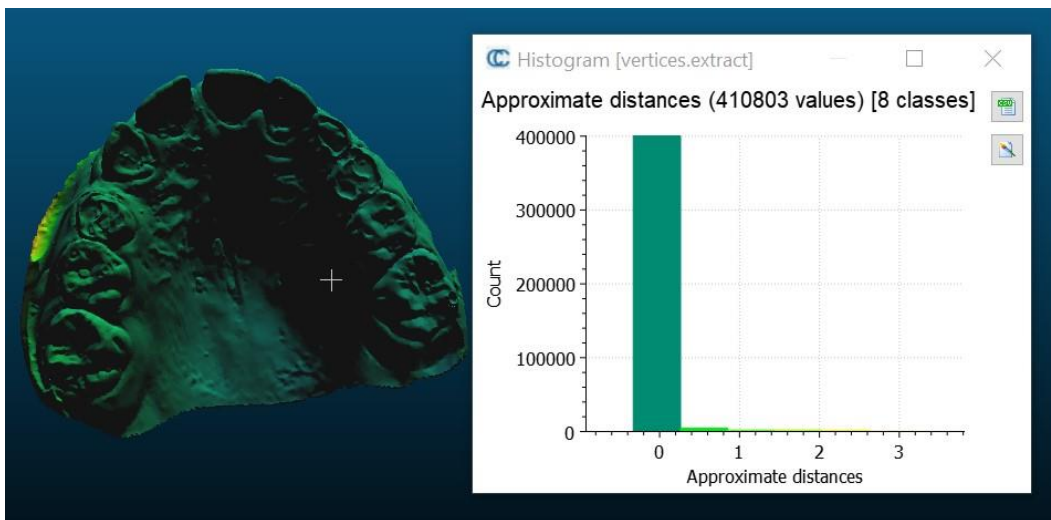

Fig 14: T06 upper jaw .

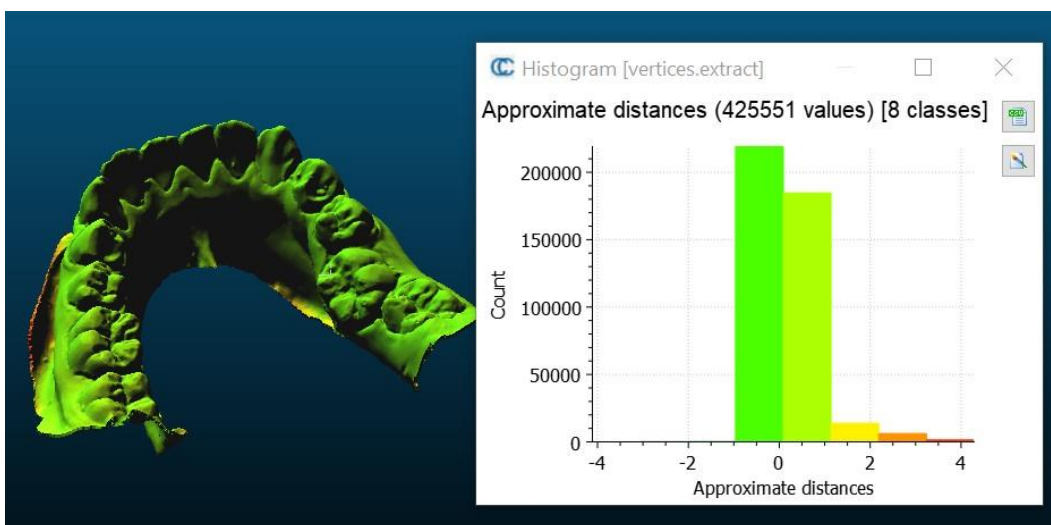

Fig 15: T07 lower jaw .



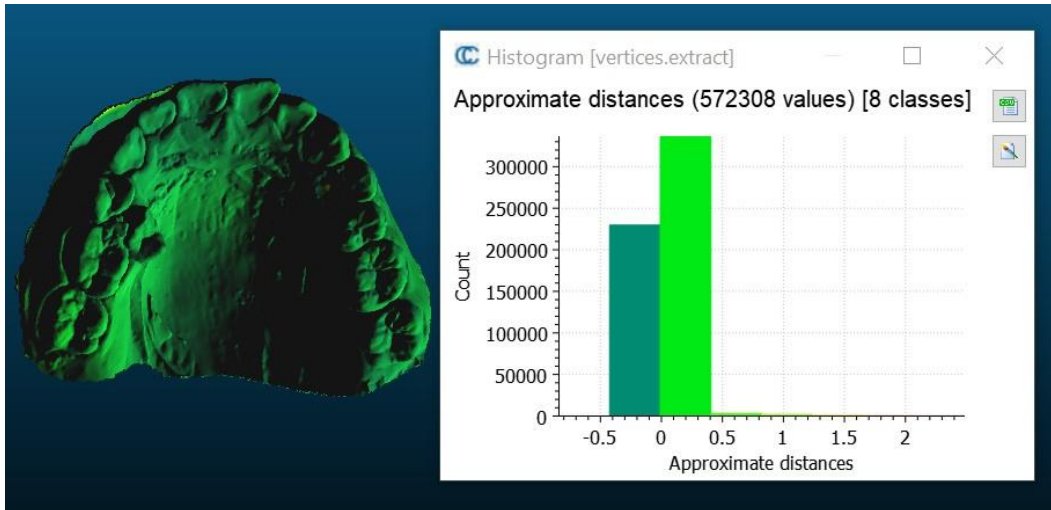

Fig 16: T07 upper jaw .

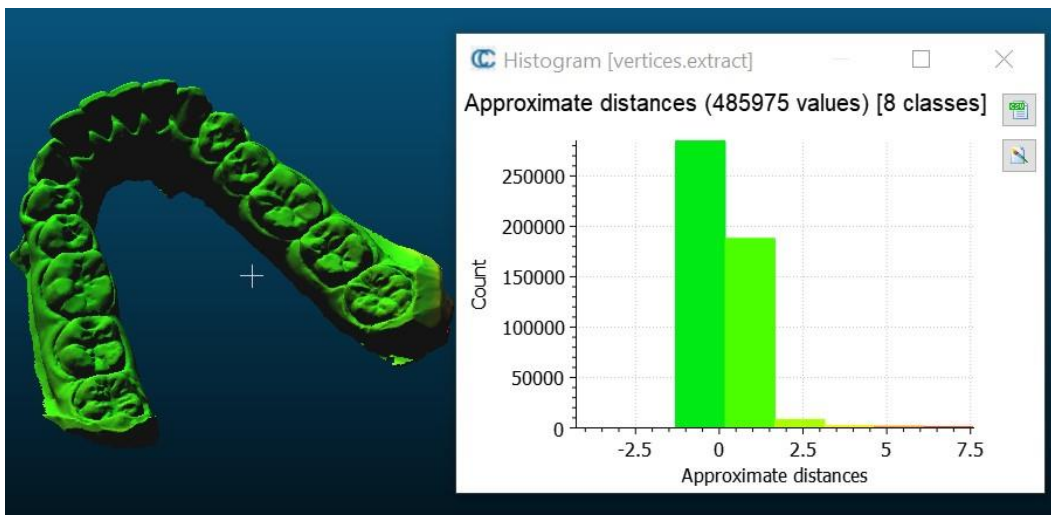

Fig 17: T08 lower jaw .

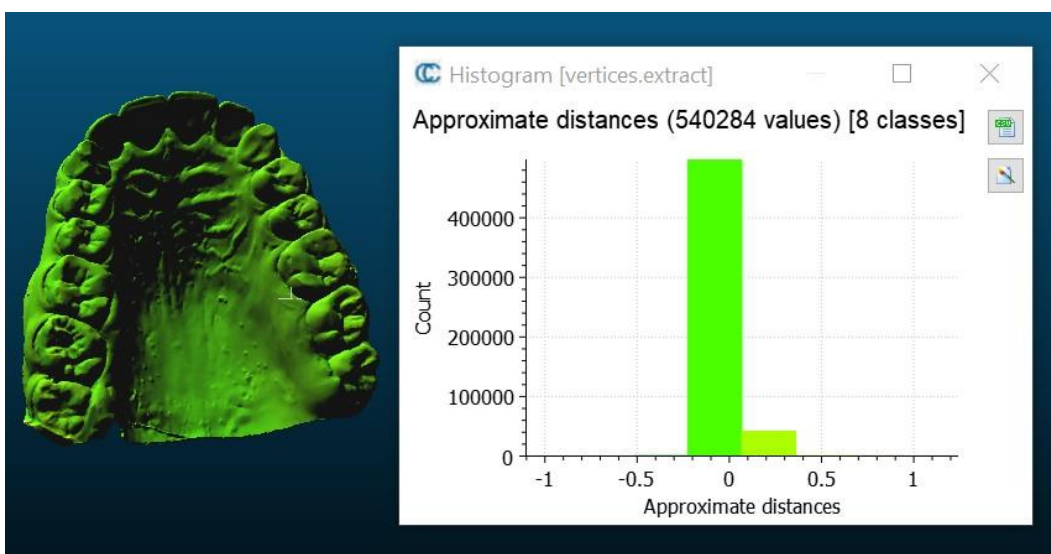

Fig 18: T08 upper jaw .



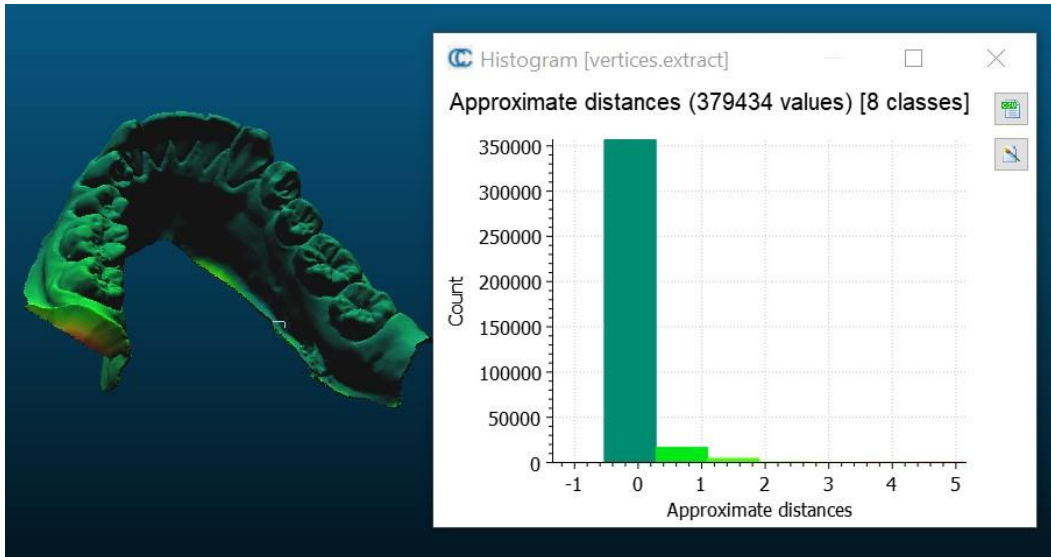

Fig 19: T09 lower jaw .

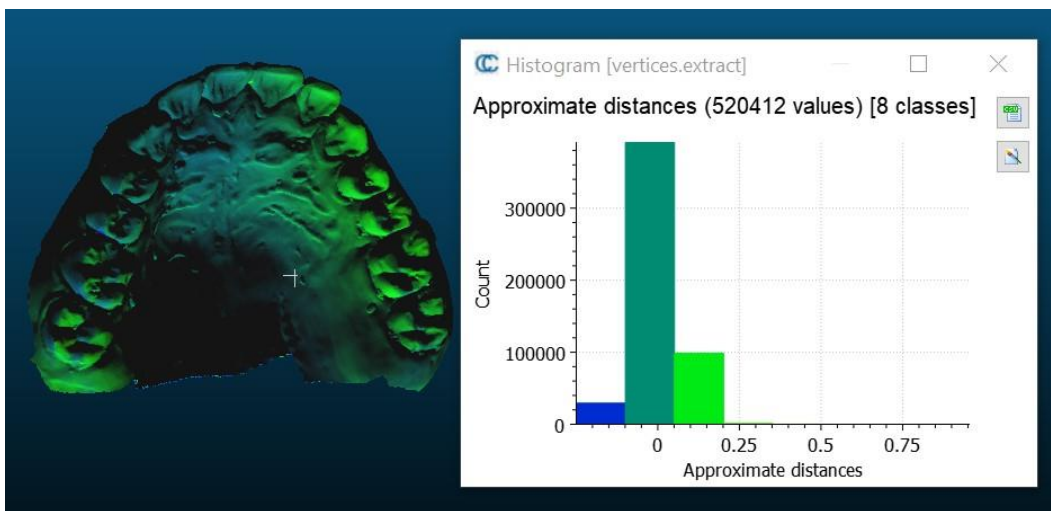

Fig 20: T09 upper jaw .

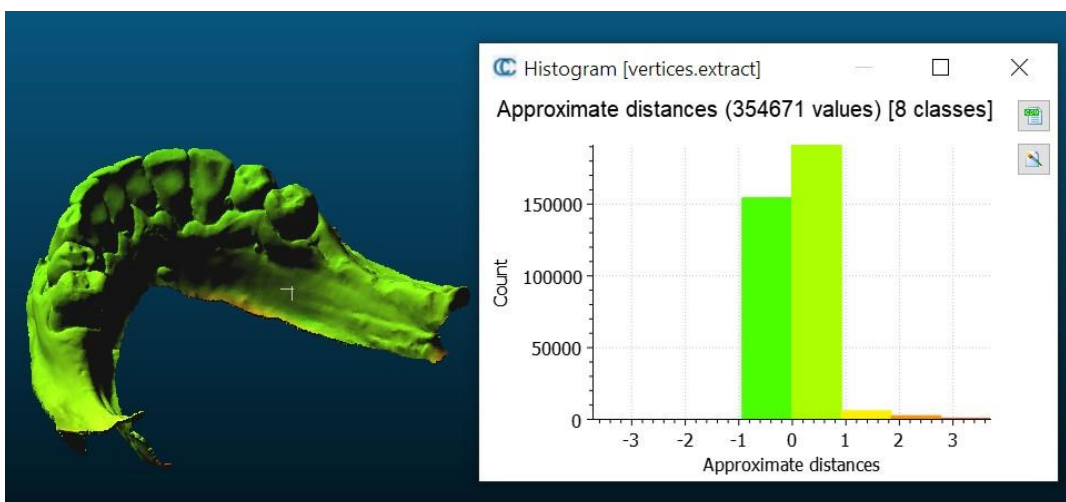

Fig 21: T10 lower jaw .

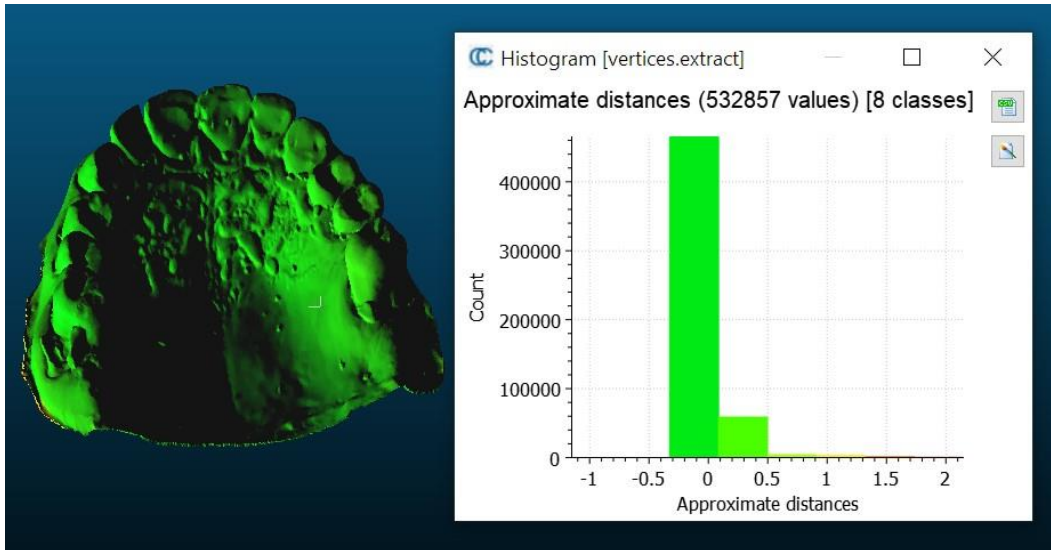

Fig 22: T10 upper jaw .

Table S6. Validation Accuracy outcomes from 3DVIT

|                  | IOS1                                |                                     | IOS2                                |                                     |
|------------------|-------------------------------------|-------------------------------------|-------------------------------------|-------------------------------------|
|                  | OP1                                 | OP2                                 | OP1                                 | OP2                                 |
| 3D printed lower |                                     |                                     |                                     |                                     |
| 3D printed upper |                                     |                                     |                                     |                                     |
| 01 Lower         |                                     |                                     |                                     |                                     |
| 01 Upper         | <input checked="" type="checkbox"/> | <input type="checkbox"/>            | <input checked="" type="checkbox"/> | <input checked="" type="checkbox"/> |
| 02 Lower         | <input checked="" type="checkbox"/> | <input checked="" type="checkbox"/> | <input checked="" type="checkbox"/> | <input checked="" type="checkbox"/> |
| 02 Upper         |                                     |                                     |                                     |                                     |
| 03 Lower         |                                     |                                     |                                     |                                     |
| 03 Upper         | <input checked="" type="checkbox"/> | <input checked="" type="checkbox"/> | <input checked="" type="checkbox"/> | <input checked="" type="checkbox"/> |
| 04 Lower         | <input checked="" type="checkbox"/> | <input checked="" type="checkbox"/> | <input checked="" type="checkbox"/> | <input type="checkbox"/>            |
| 04 Upper         |                                     |                                     |                                     |                                     |
| 05 Lower         | <input checked="" type="checkbox"/> | <input checked="" type="checkbox"/> | <input checked="" type="checkbox"/> | <input checked="" type="checkbox"/> |
| 05 Upper         |                                     |                                     |                                     |                                     |
| 06 Lower         |                                     |                                     |                                     |                                     |
| 06 Upper         | <input checked="" type="checkbox"/> | <input checked="" type="checkbox"/> | <input checked="" type="checkbox"/> | <input checked="" type="checkbox"/> |
| 07 Lower         | <input checked="" type="checkbox"/> | <input checked="" type="checkbox"/> | <input type="checkbox"/>            | <input checked="" type="checkbox"/> |
| 07 Upper         |                                     |                                     |                                     |                                     |
| 08 Lower         |                                     |                                     |                                     |                                     |
| 08 Upper         | <input checked="" type="checkbox"/> | <input checked="" type="checkbox"/> | <input checked="" type="checkbox"/> | <input checked="" type="checkbox"/> |
| 09 Lower         | <input checked="" type="checkbox"/> | <input checked="" type="checkbox"/> | <input type="checkbox"/>            | <input checked="" type="checkbox"/> |
| 09 Upper         |                                     |                                     |                                     |                                     |
| 10 Lower         |                                     |                                     |                                     |                                     |
| 10 Upper         | <input checked="" type="checkbox"/> | <input checked="" type="checkbox"/> | <input checked="" type="checkbox"/> | <input checked="" type="checkbox"/> |
|                  | <b>10</b>                           | <b>9</b>                            | <b>8</b>                            | <b>9</b>                            |

## Additional References

---

- <sup>i</sup> Ranftl R, Bochkovskiy A, Koltun V. Vision transformers for dense prediction. In Proceedings of the IEEE/CVF International Conference on Computer Vision 2021 (pp. 12179-12188).
- <sup>ii</sup> Liu AT, Li SW, Lee HY. Tera: Self-supervised learning of transformer encoder representation for speech. *IEEE/ACM Transactions on Audio, Speech, and Language Processing*. 2021 Jul 8;29:2351-66.
- <sup>iii</sup> Gardner MW, Dorling SR. Artificial neural networks (the multilayer perceptron)—a review of applications in the atmospheric sciences. *Atmospheric environment*. 1998 Aug 1;32(14-15):2627-36.
- <sup>iv</sup> Niu Z, Zhong G, Yu H. A review on the attention mechanism of deep learning. *Neurocomputing*. 2021 Sep 10;452:48-62.
- <sup>v</sup> Pedamonti D. Comparison of non-linear activation functions for deep neural networks on MNIST classification task. *arXiv preprint arXiv:1804.02763*. 2018 Apr 8.
- <sup>vi</sup> Nitta T. Orthogonality of decision boundaries in complex-valued neural networks. *Neural computation*. 2004 Jan 1;16(1):73-97.
- <sup>vii</sup> Liu Y, Wang T, Zhang X, Sun J. Petr: Position embedding transformation for multi-view 3d object detection. In *Computer Vision—ECCV 2022: 17th European Conference, Tel Aviv, Israel, October 23–27, 2022, Proceedings, Part XXVII 2022 Oct 30* (pp. 531-548). Cham: Springer Nature Switzerland.
- <sup>viii</sup> Raghu M, Unterthiner T, Kornblith S, Zhang C, Dosovitskiy A. Do vision transformers see like convolutional neural networks?. *Advances in Neural Information Processing Systems*. 2021 Dec 6;34:12116-28.
